# Supplementary material
Source: PubMed Central journal article supplement (PMC2823435)

# Supplemental Figure 1

(56 MS/MS spectra)

SUPPLEMENTAL FIGURE 1. MS/MS spectra for all the peptides identified and analyzed in the study. For those peptides that cannot be resolved from the MS/MS data alone (with superscript <sup>b</sup> in Sup. Table 1), a representative MS/MS spectrum for one of the possible peptides is provided.

prKpr,me1:1STGAAKR

H1.4K25me1:1

#8326-8326 RT:59.05-59.05 NL: 4.02E5

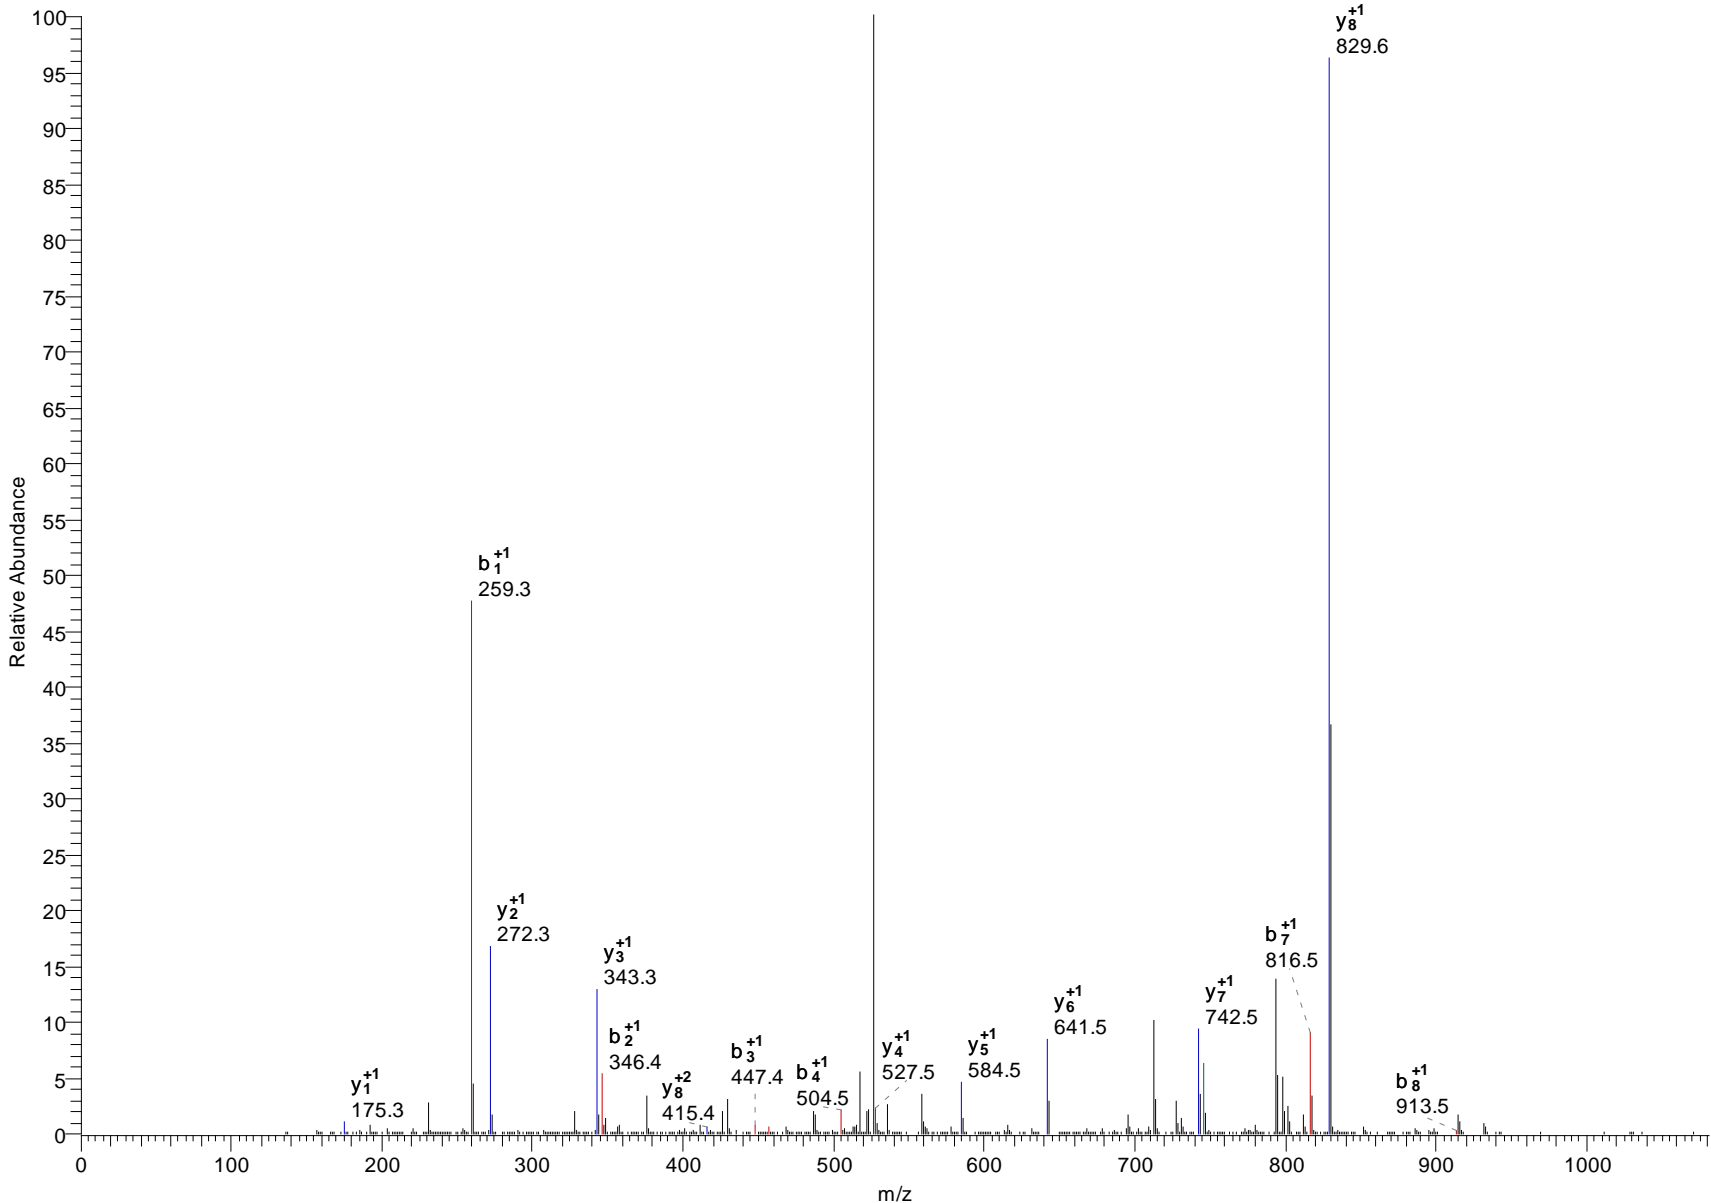

TKpr,me1:1QTAR

H3K4me1:1

#6739-6739 RT:47.95-47.95 NL: 2.09E4

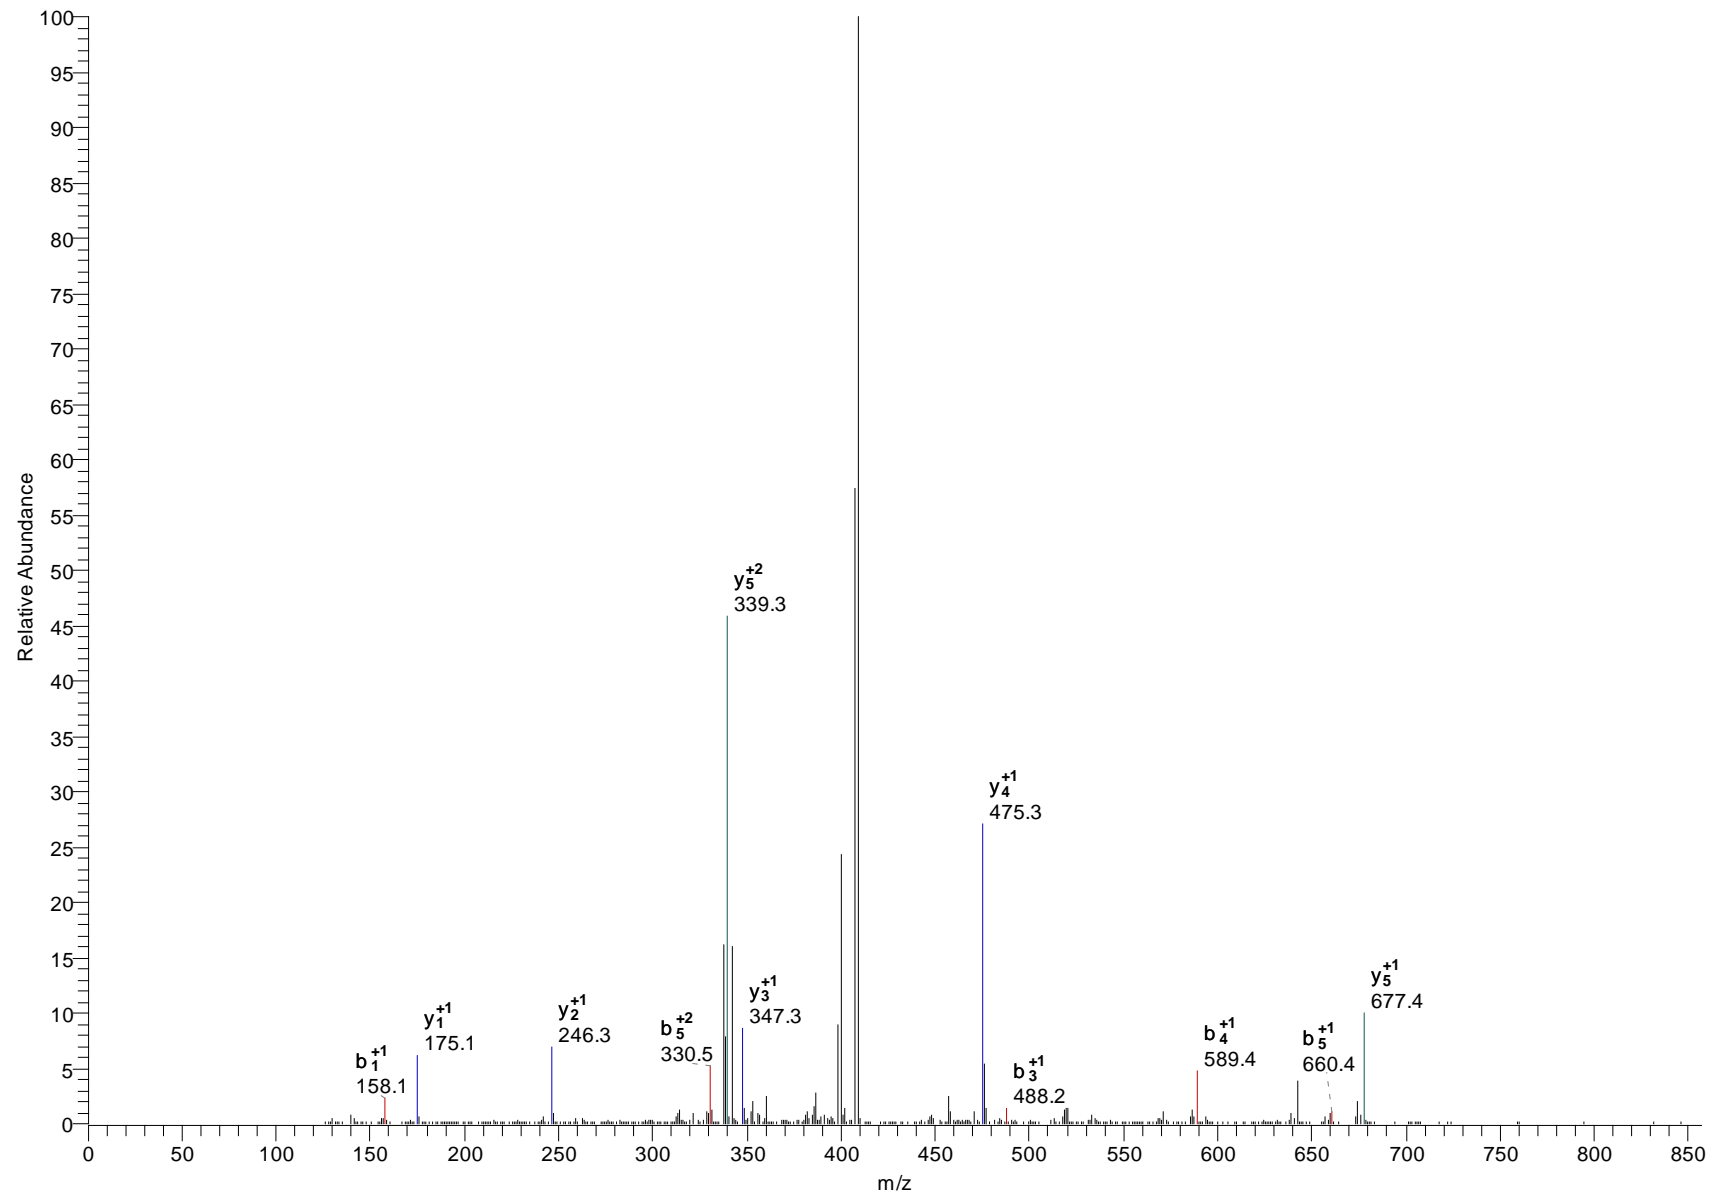

prKpr,me1:1STGGKprAPR

H3K9me1:1

#8710-8710 RT:59.52-59.52 NL: 4.34E5

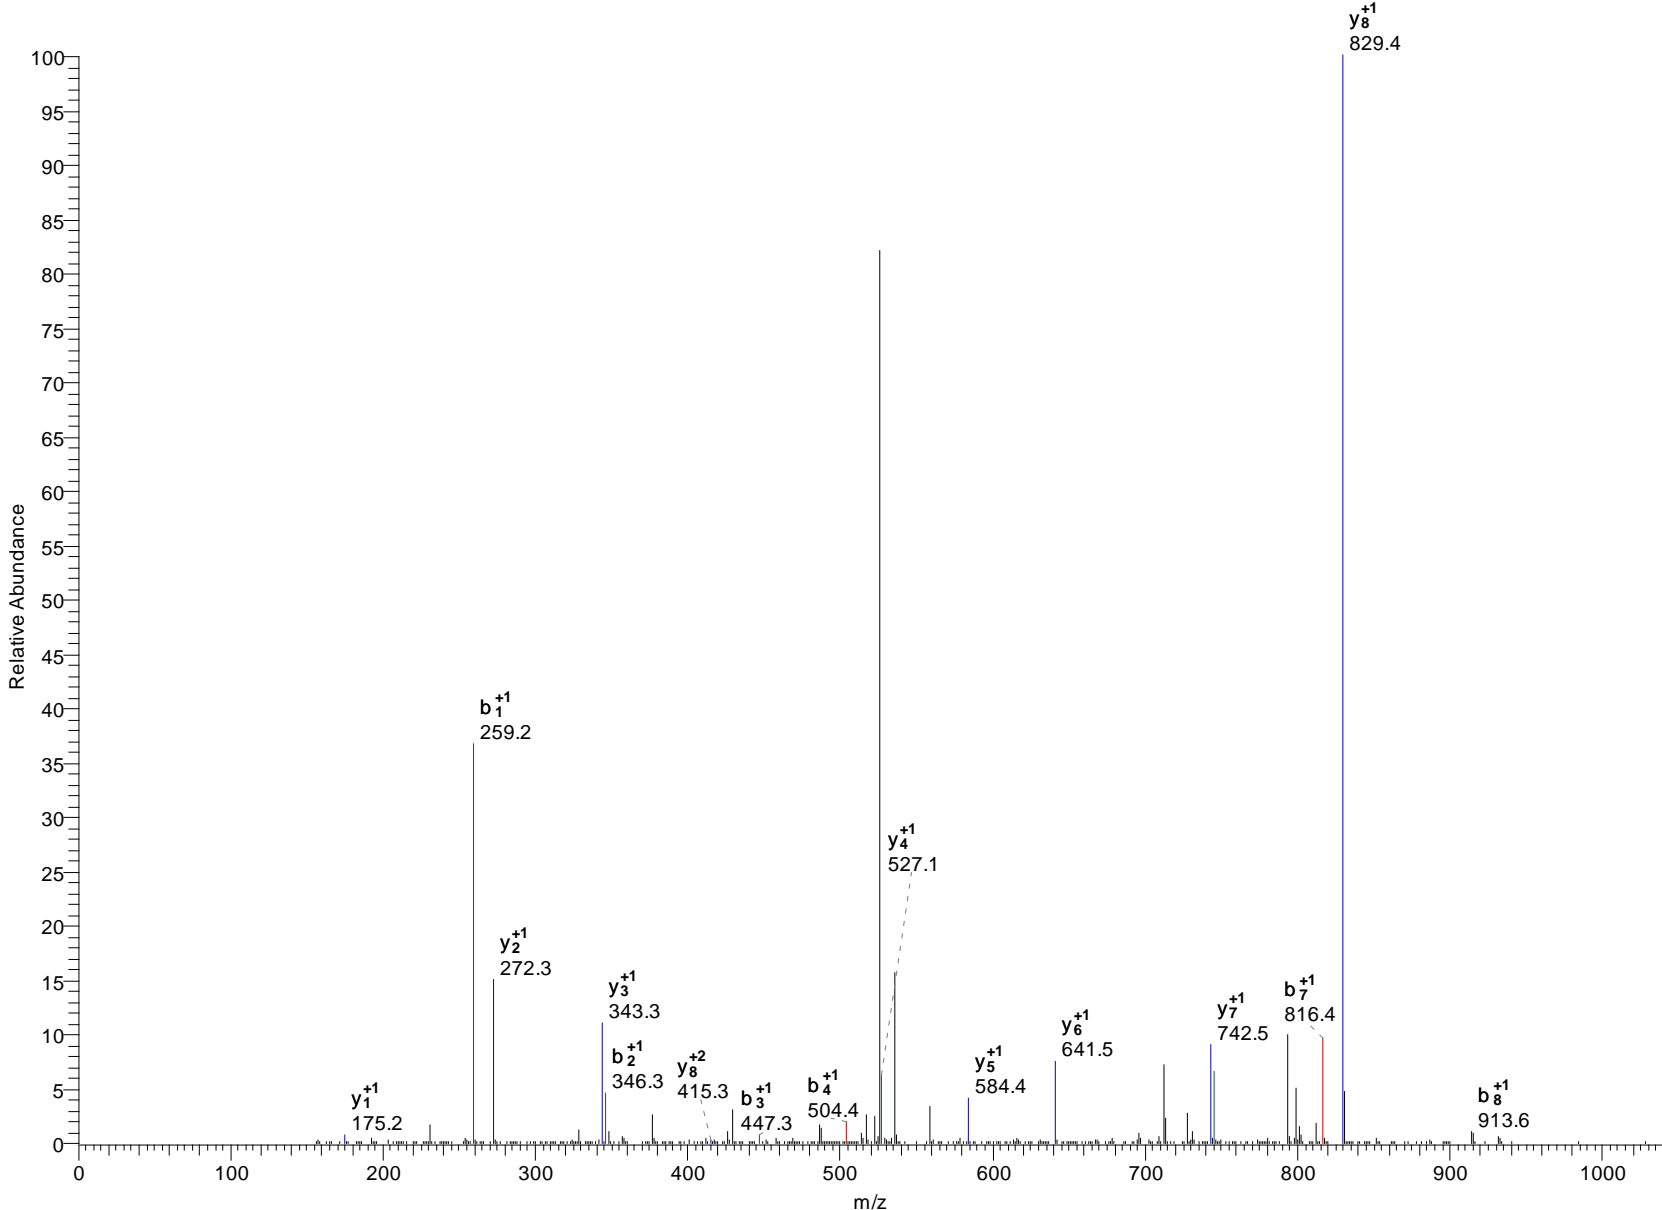

prKme2:1STGGKprAPR

H3K9me2:1

#2906-2906 RT:25.20-25.20 NL: 5.79E2

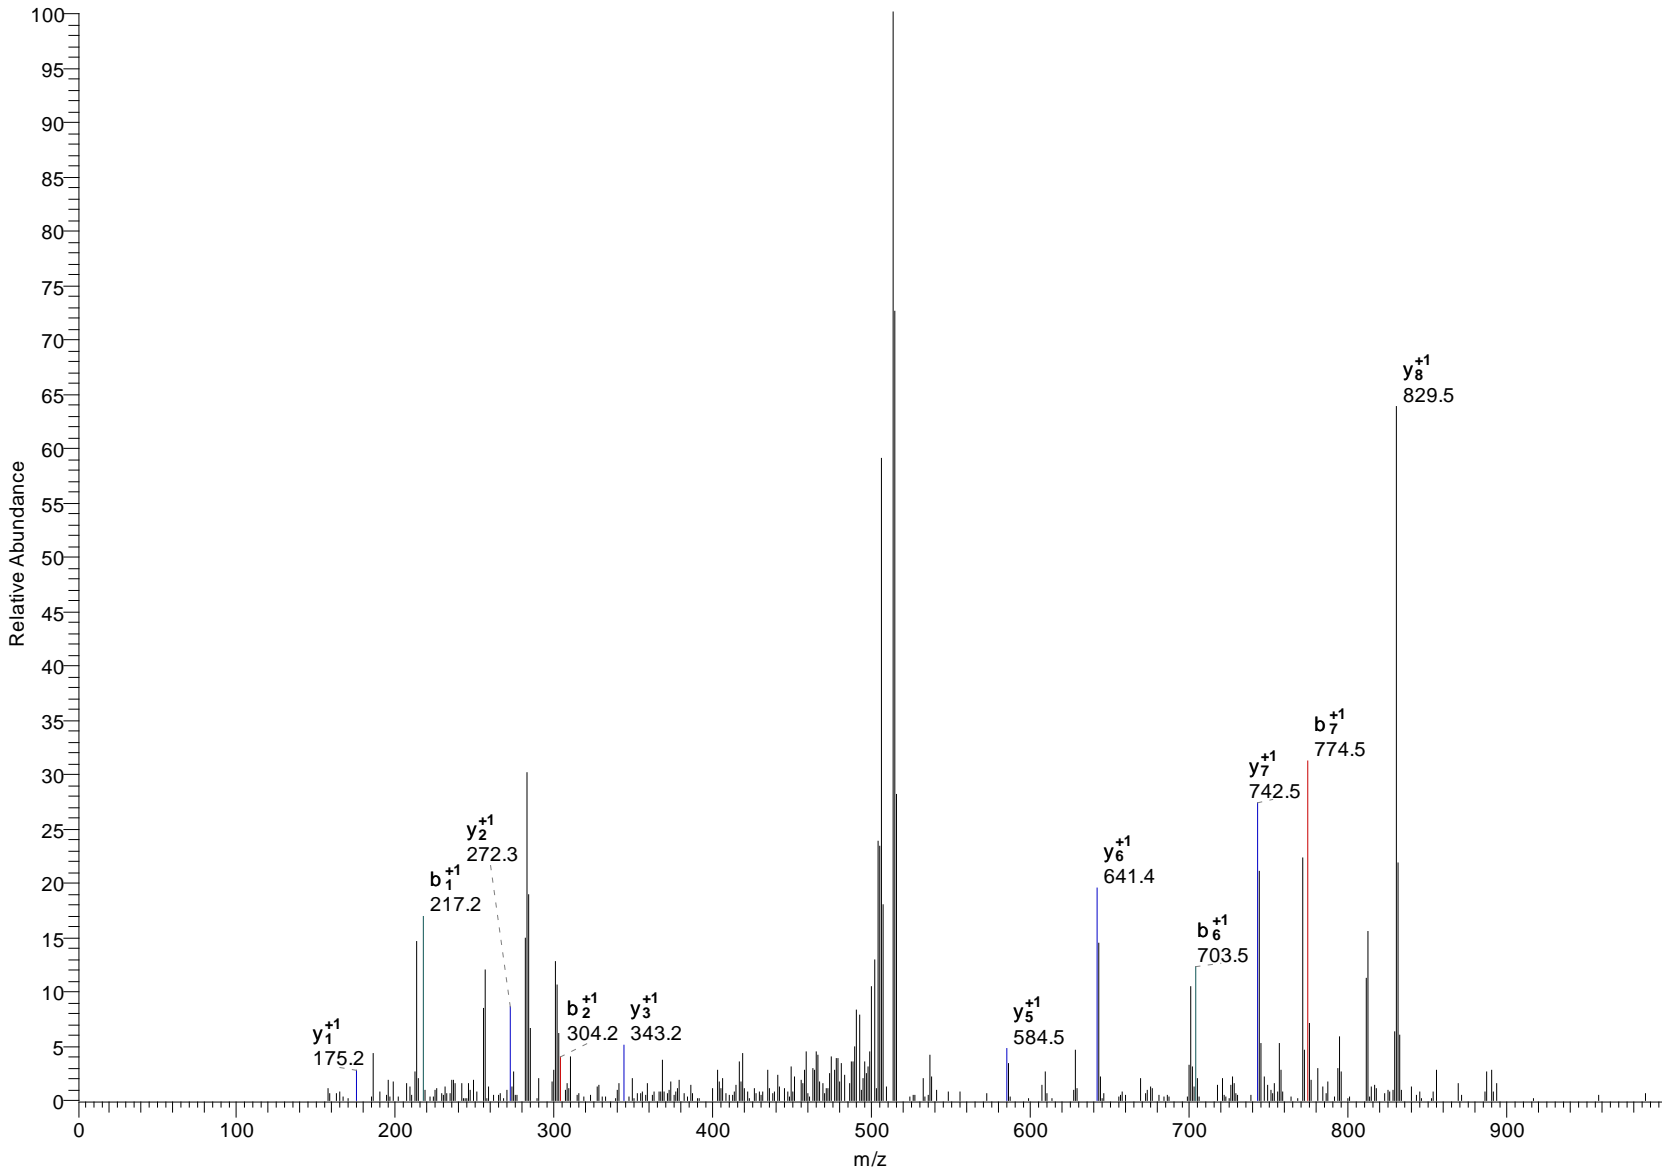

prKme2:2STGGKprAPR

H3K9me2:2

#5729-5729 RT:42.28-42.28 NL: 8.92E4

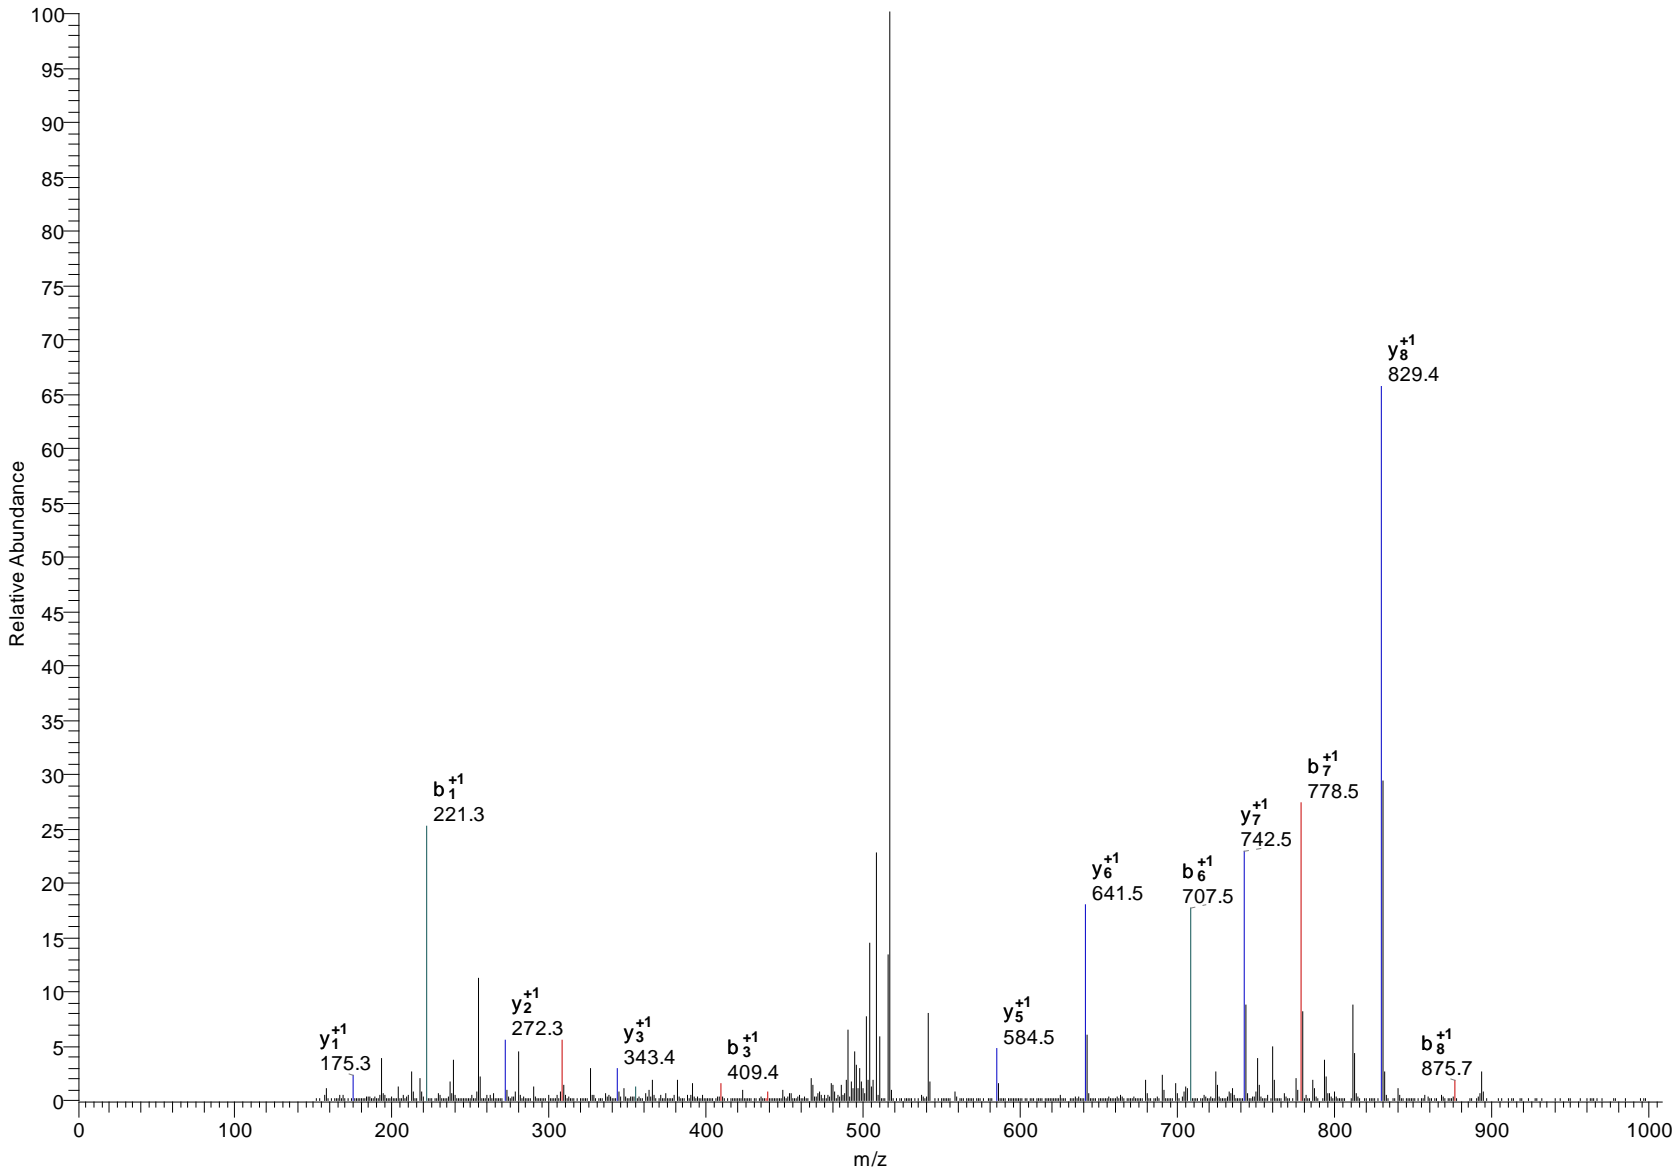

prKme3:1STGGKprAPR

H3K9me3:1

#3134-3134 RT:26.63-26.63 NL: 1.04E2

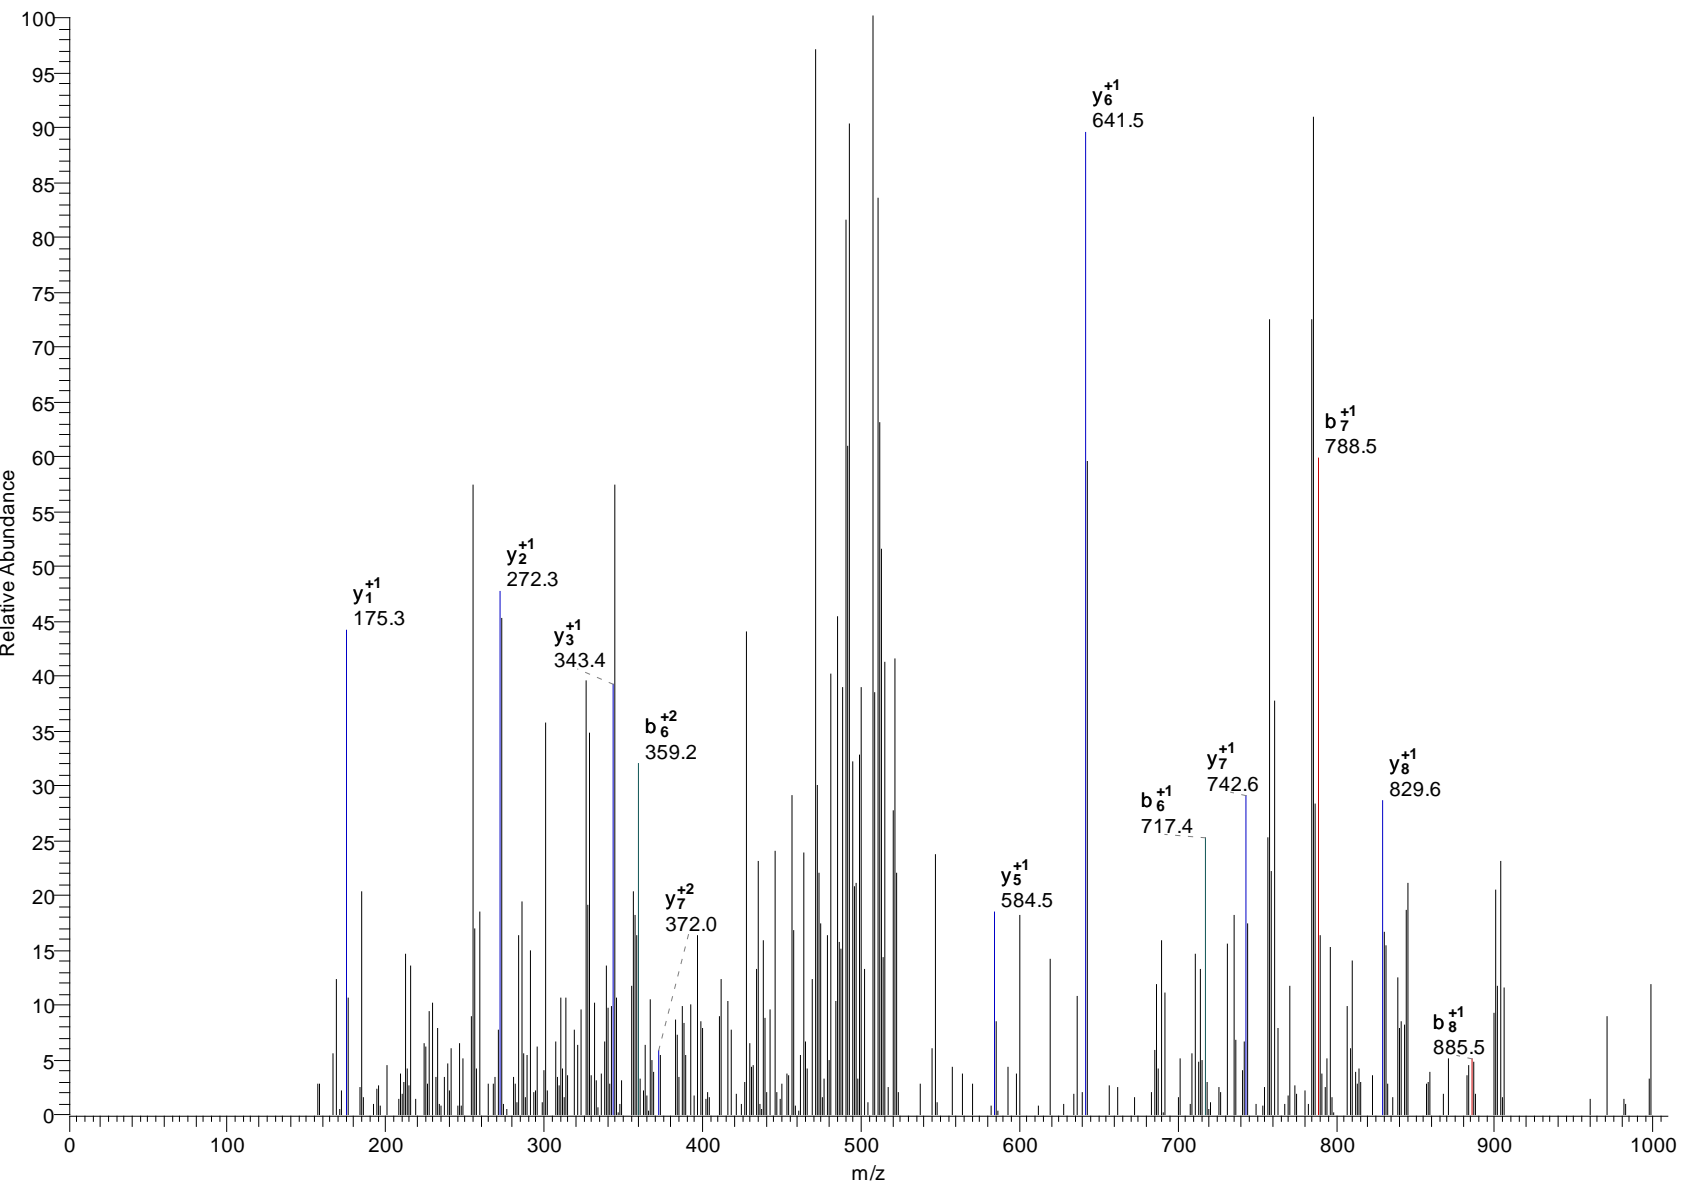

prKme3:2STGGKprAPR

H3K9me3:2

#5365-5365 RT:40.01-40.01 NL: 1.46E3

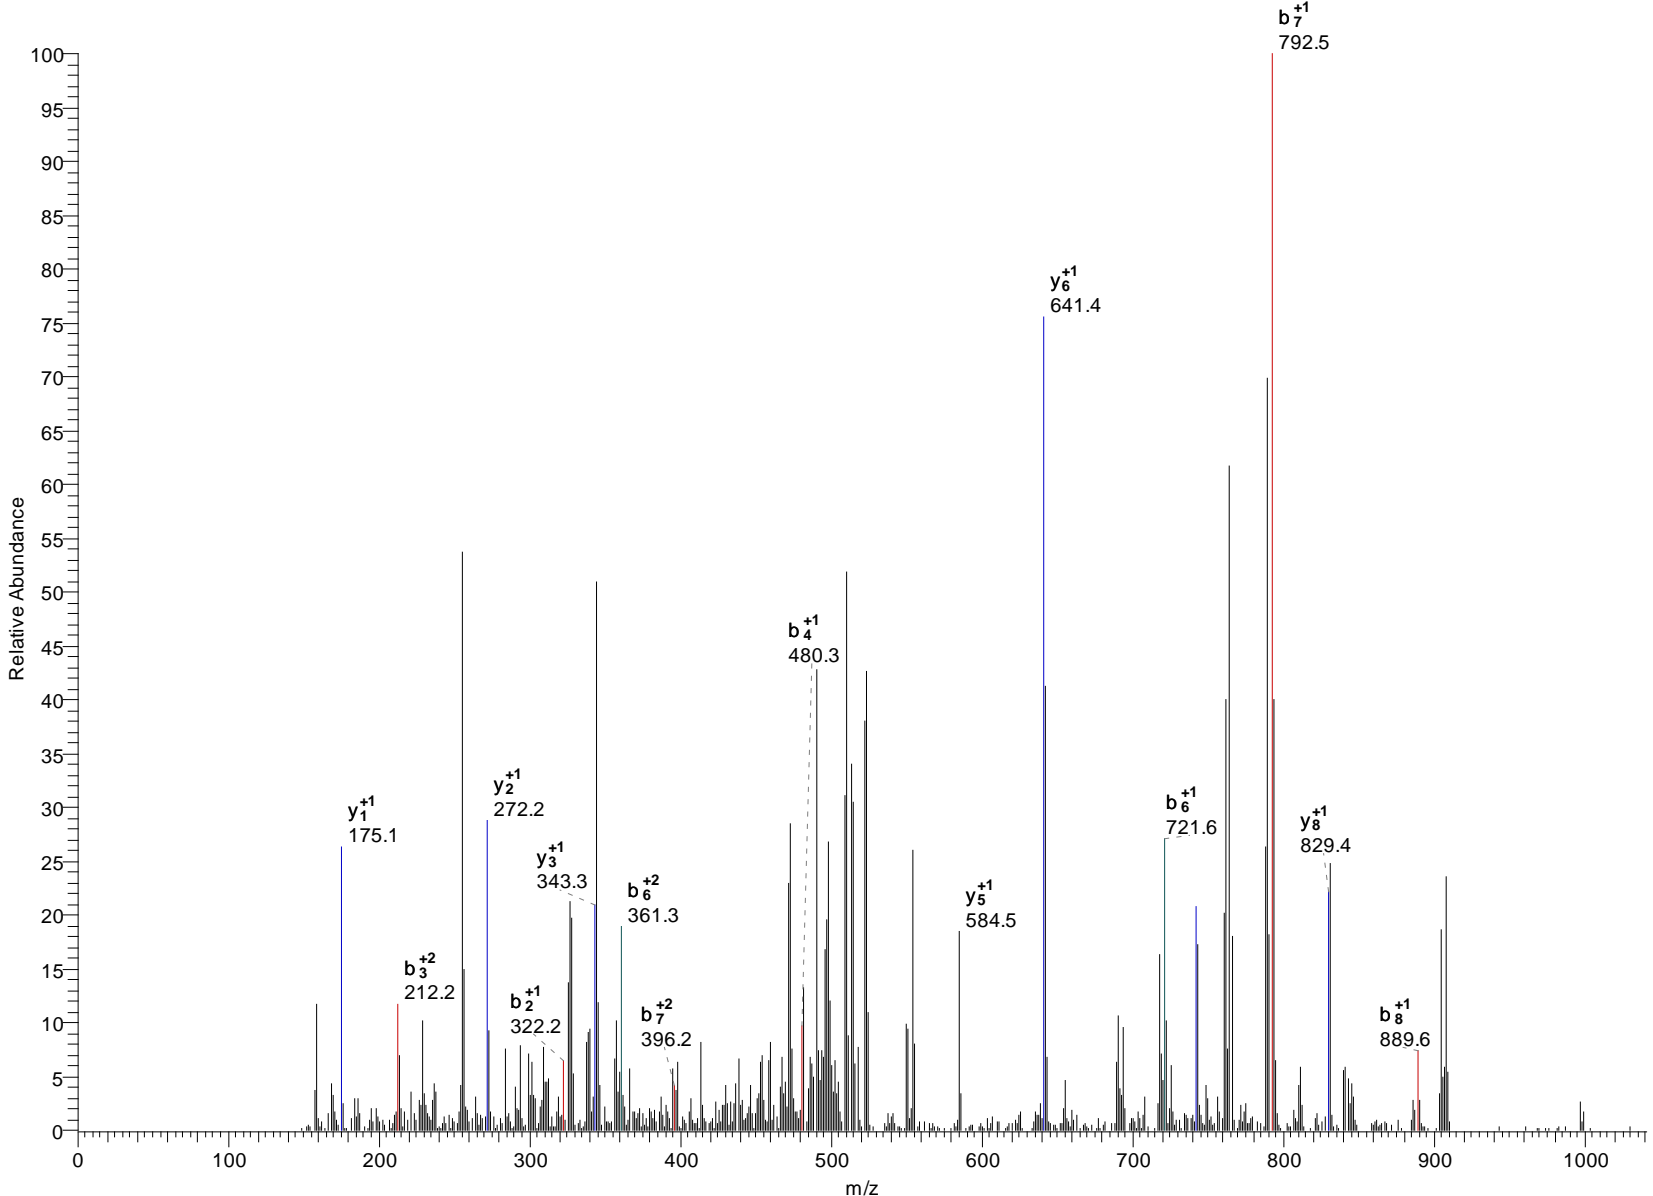



prKme3:3STGGKprAPR

H3K9me3:3

#5660-5660 RT:41.89-41.89 NL: 2.46E3

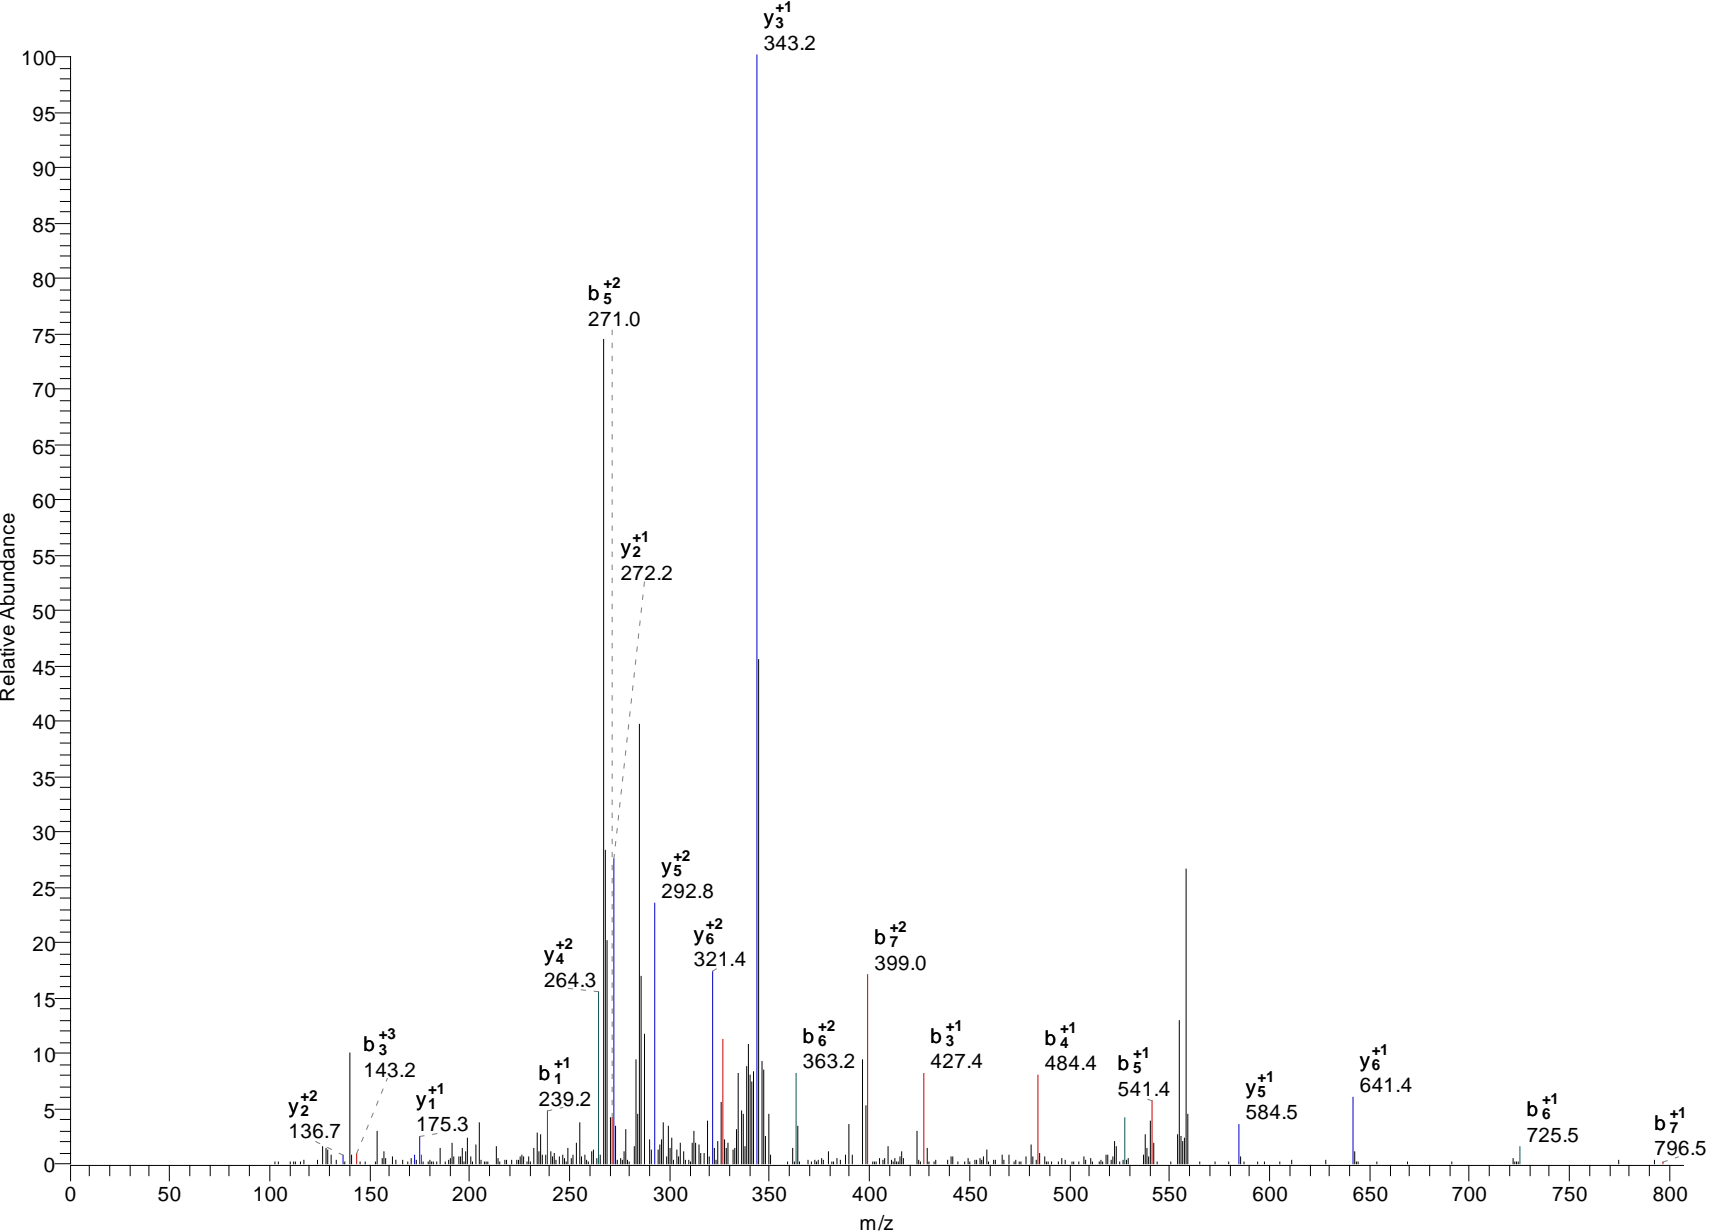

prKpr,me1:1STGGKacAPR

H3K9me1:1K14ac1

#8209-8209 RT:56.59-56.59 NL: 4.27E3

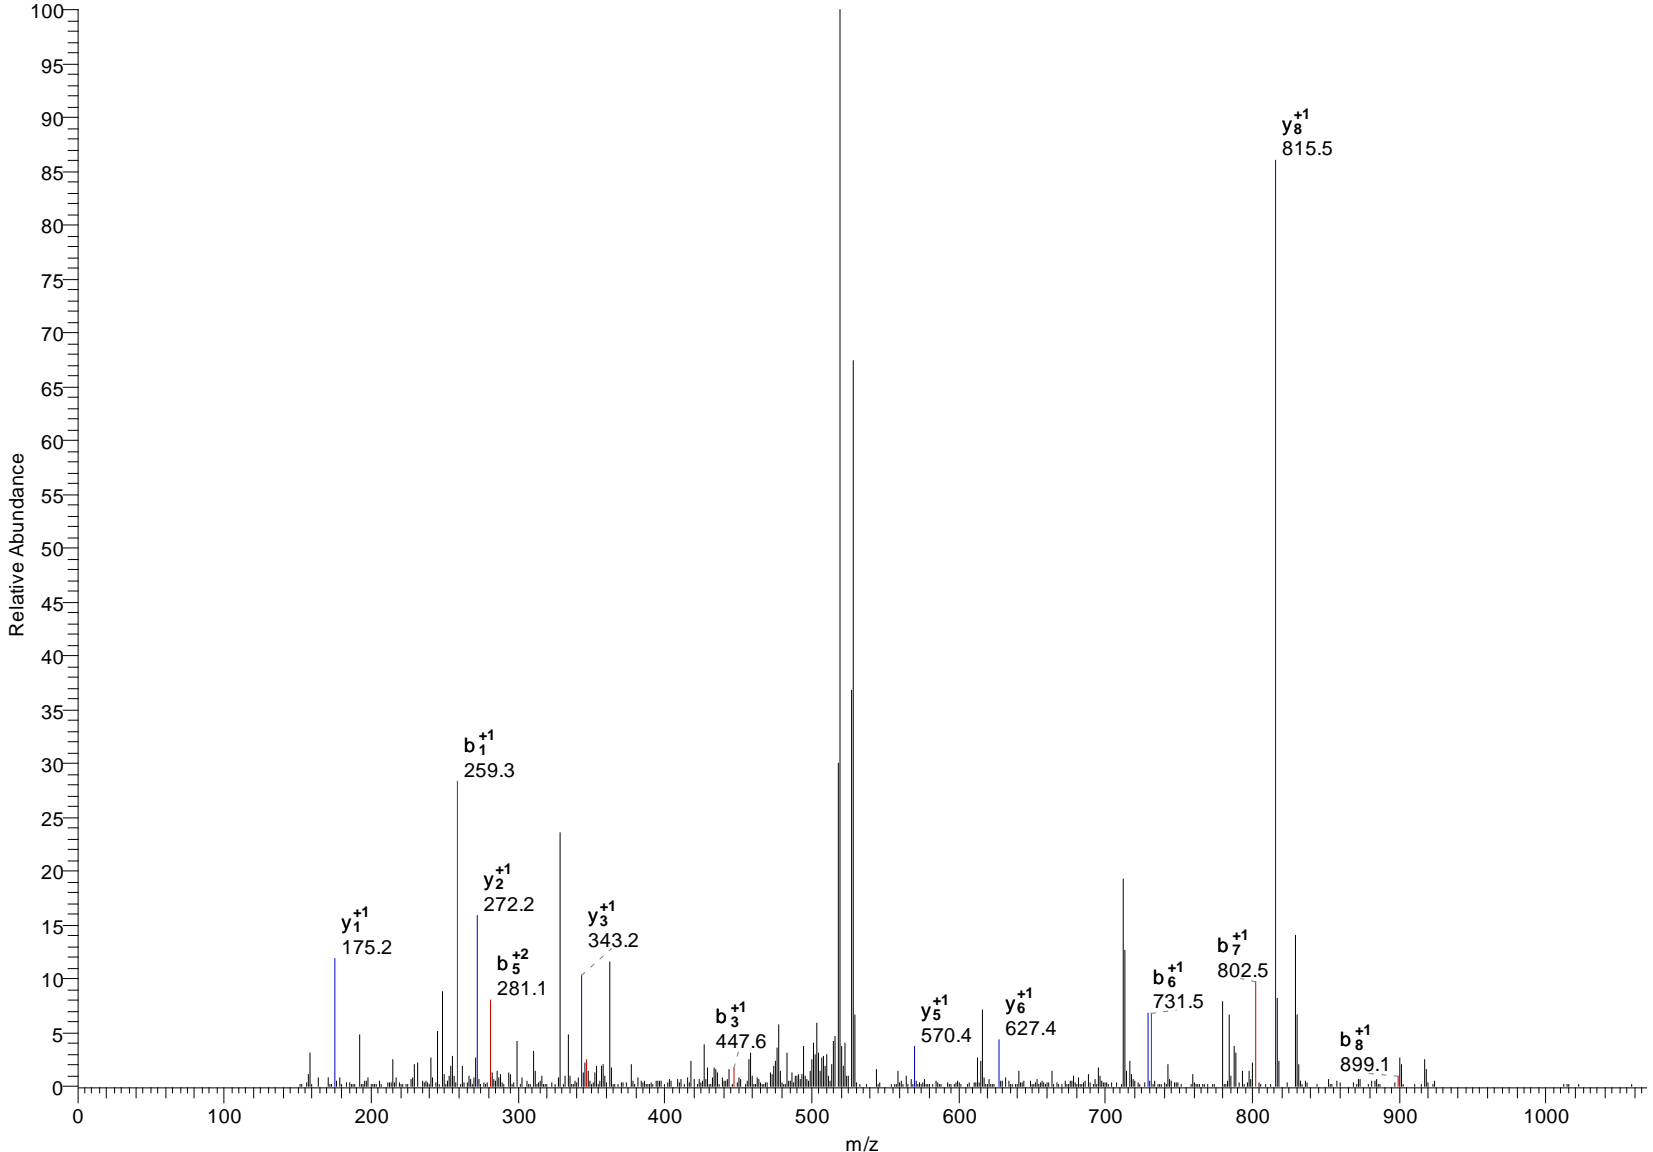

prKme2:1STGGKacAPR

H3K9me2:1K14ac1

#2124-2124 RT:20.78-20.78 NL: 3.31E2

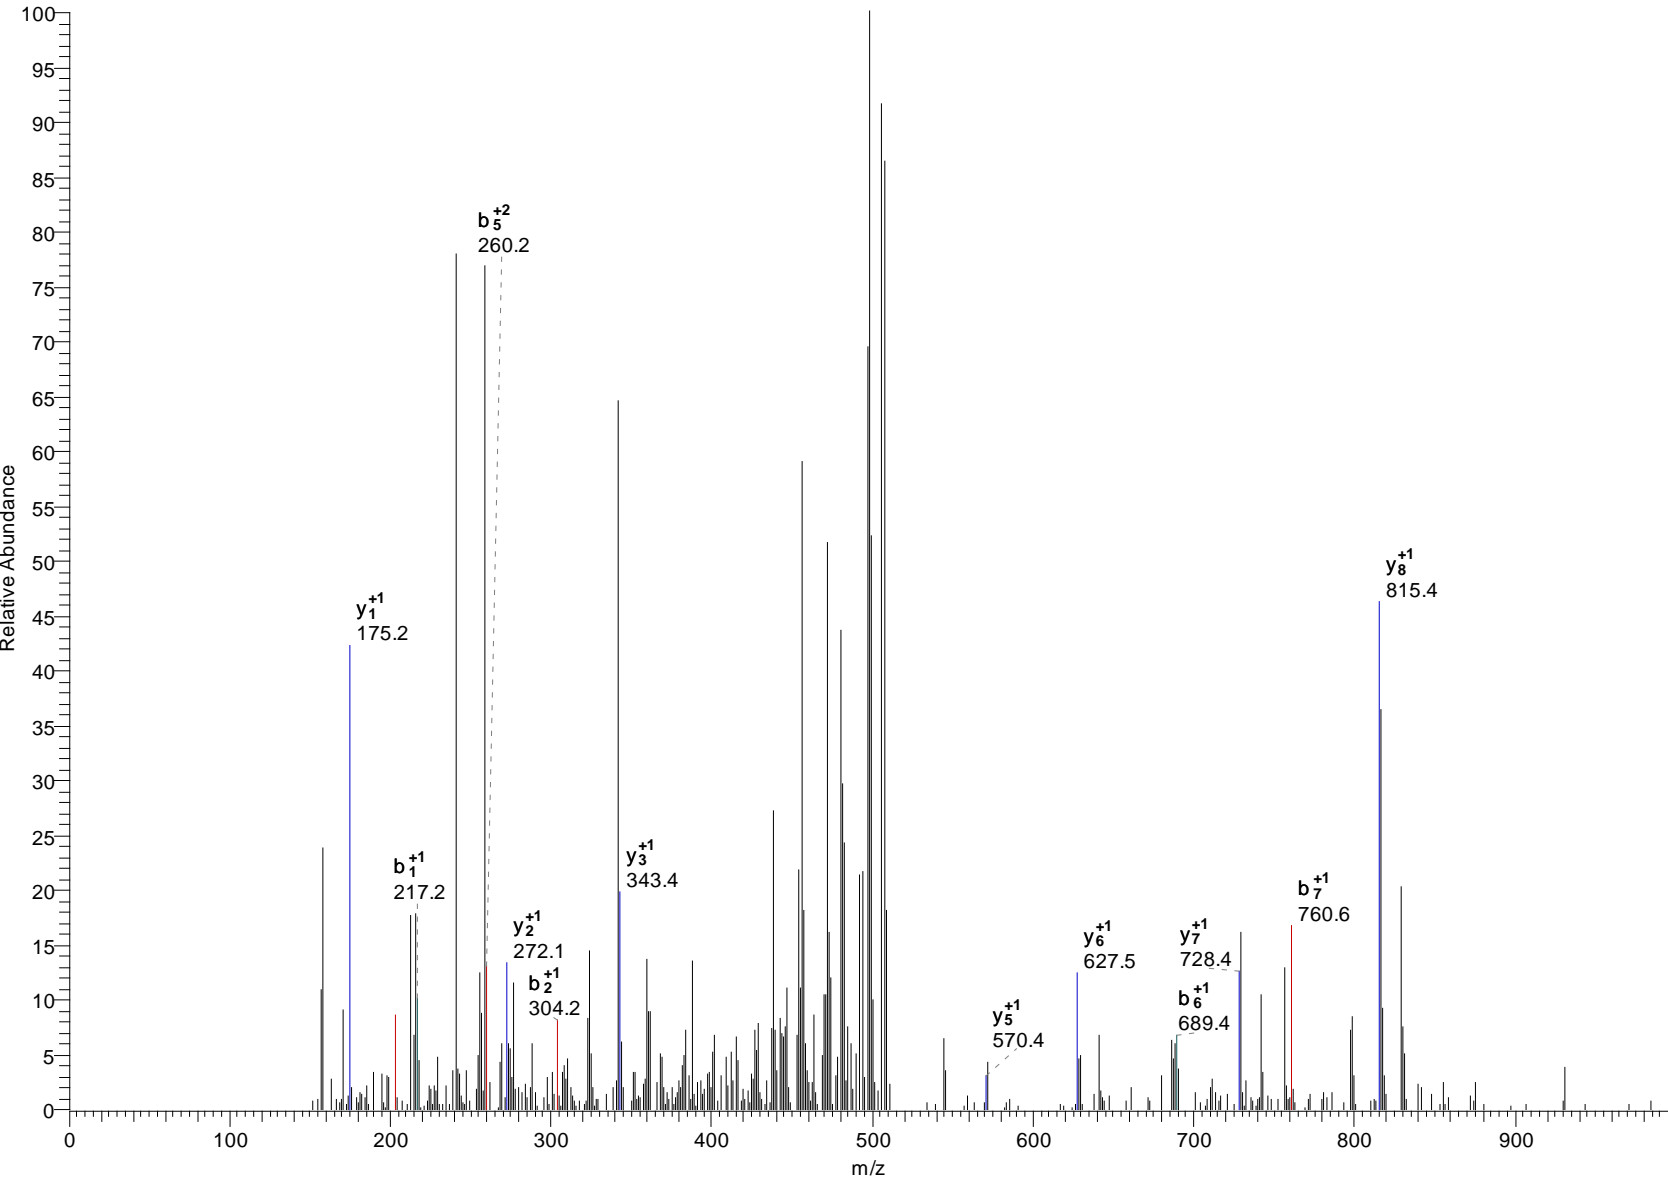

prKme2:2STGGKacAPR

H3K9me2:2K14ac1

#4802-4802 RT:36.99-36.99 NL: 8.66E3

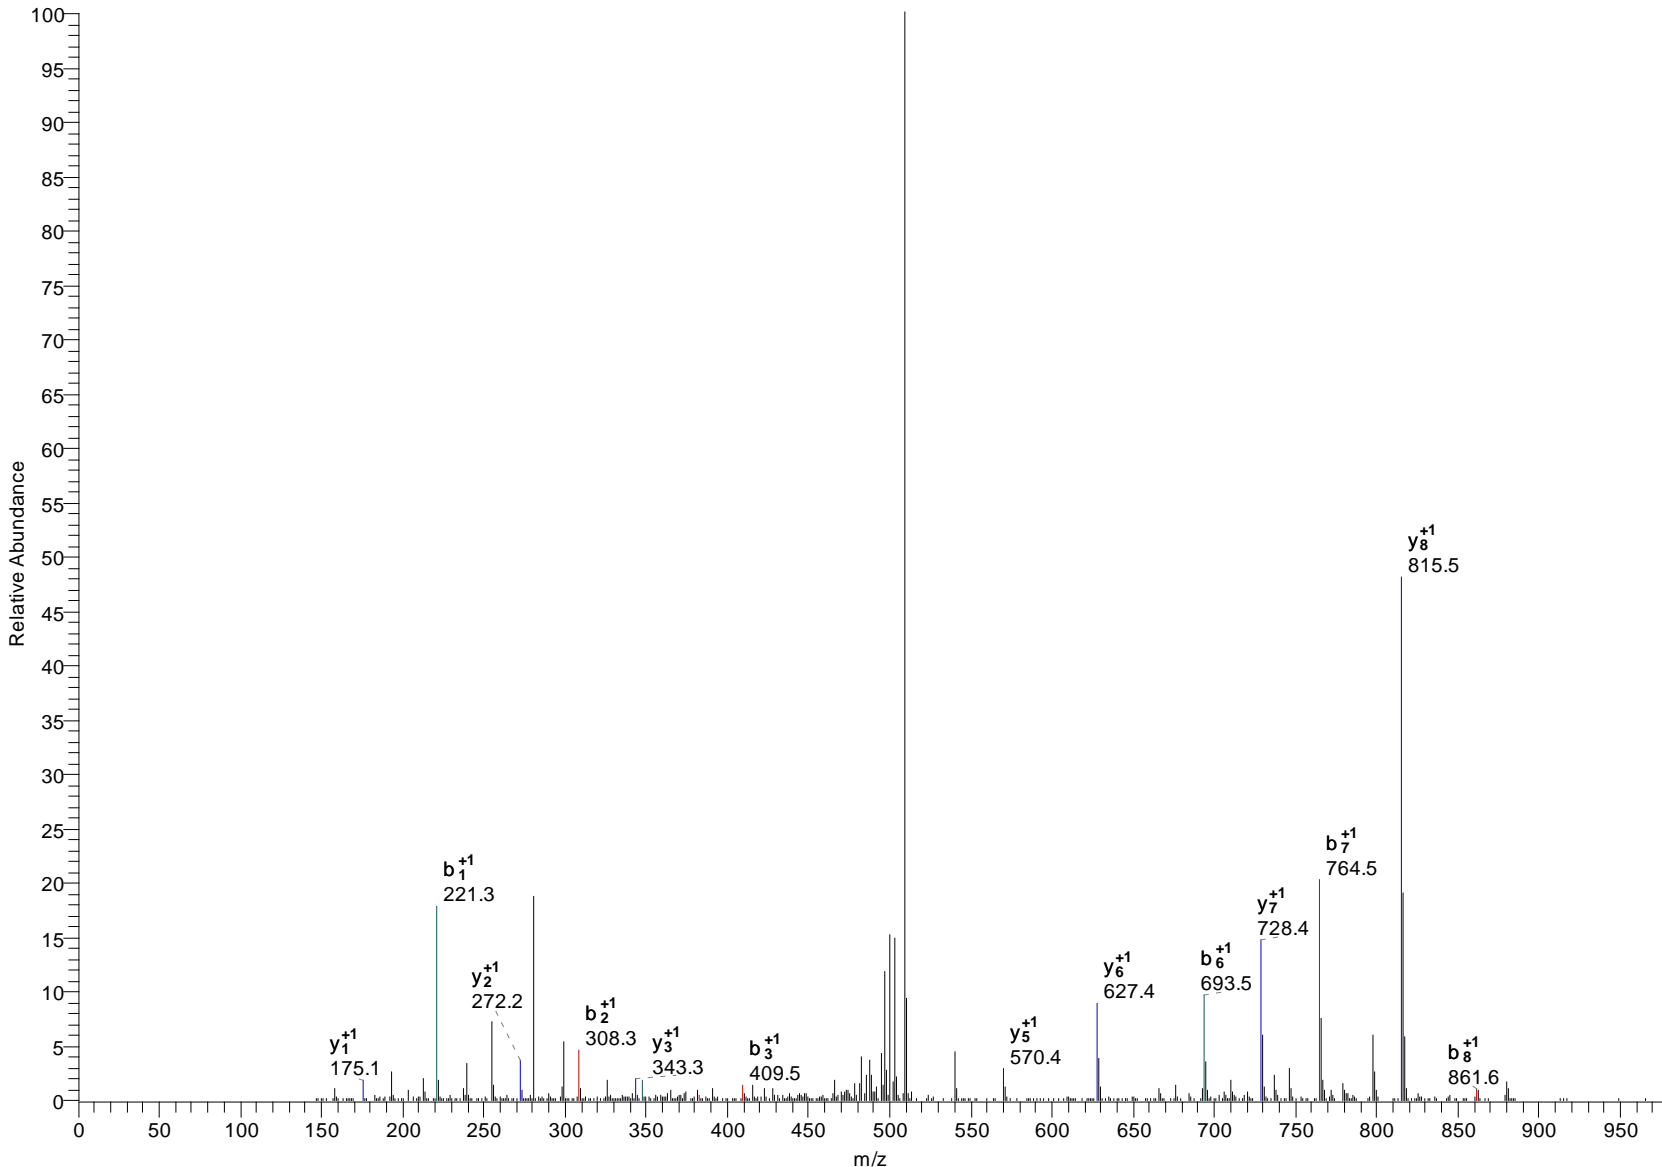

prKpr,me1:1QLATKprAAR

H3K18me1:1

#12492-12492 RT:81.61-81.61 NL: 1.06E4

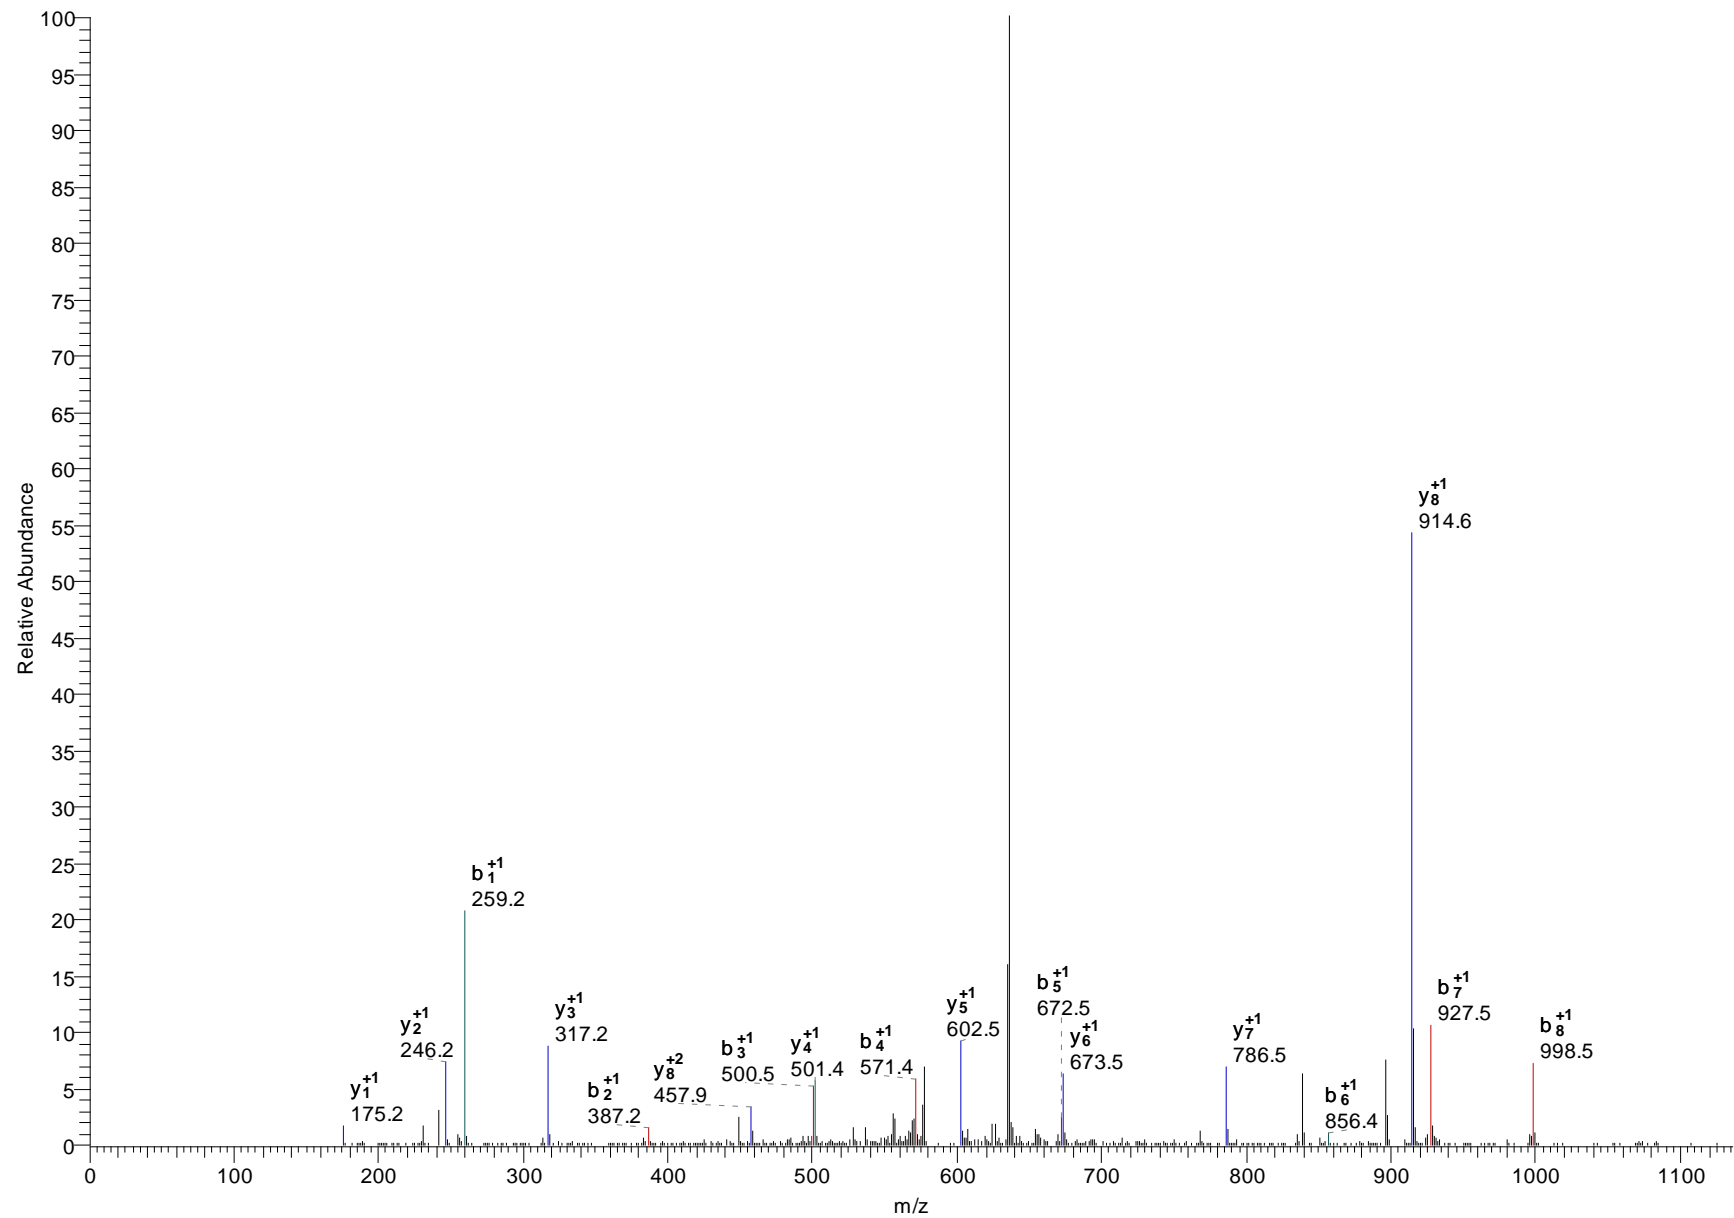

prKprSAPATGGVKpr,me1:1KprPHR

H3K36me1:1

#10093-10093 RT:67.69-67.69 NL: 7.09E3

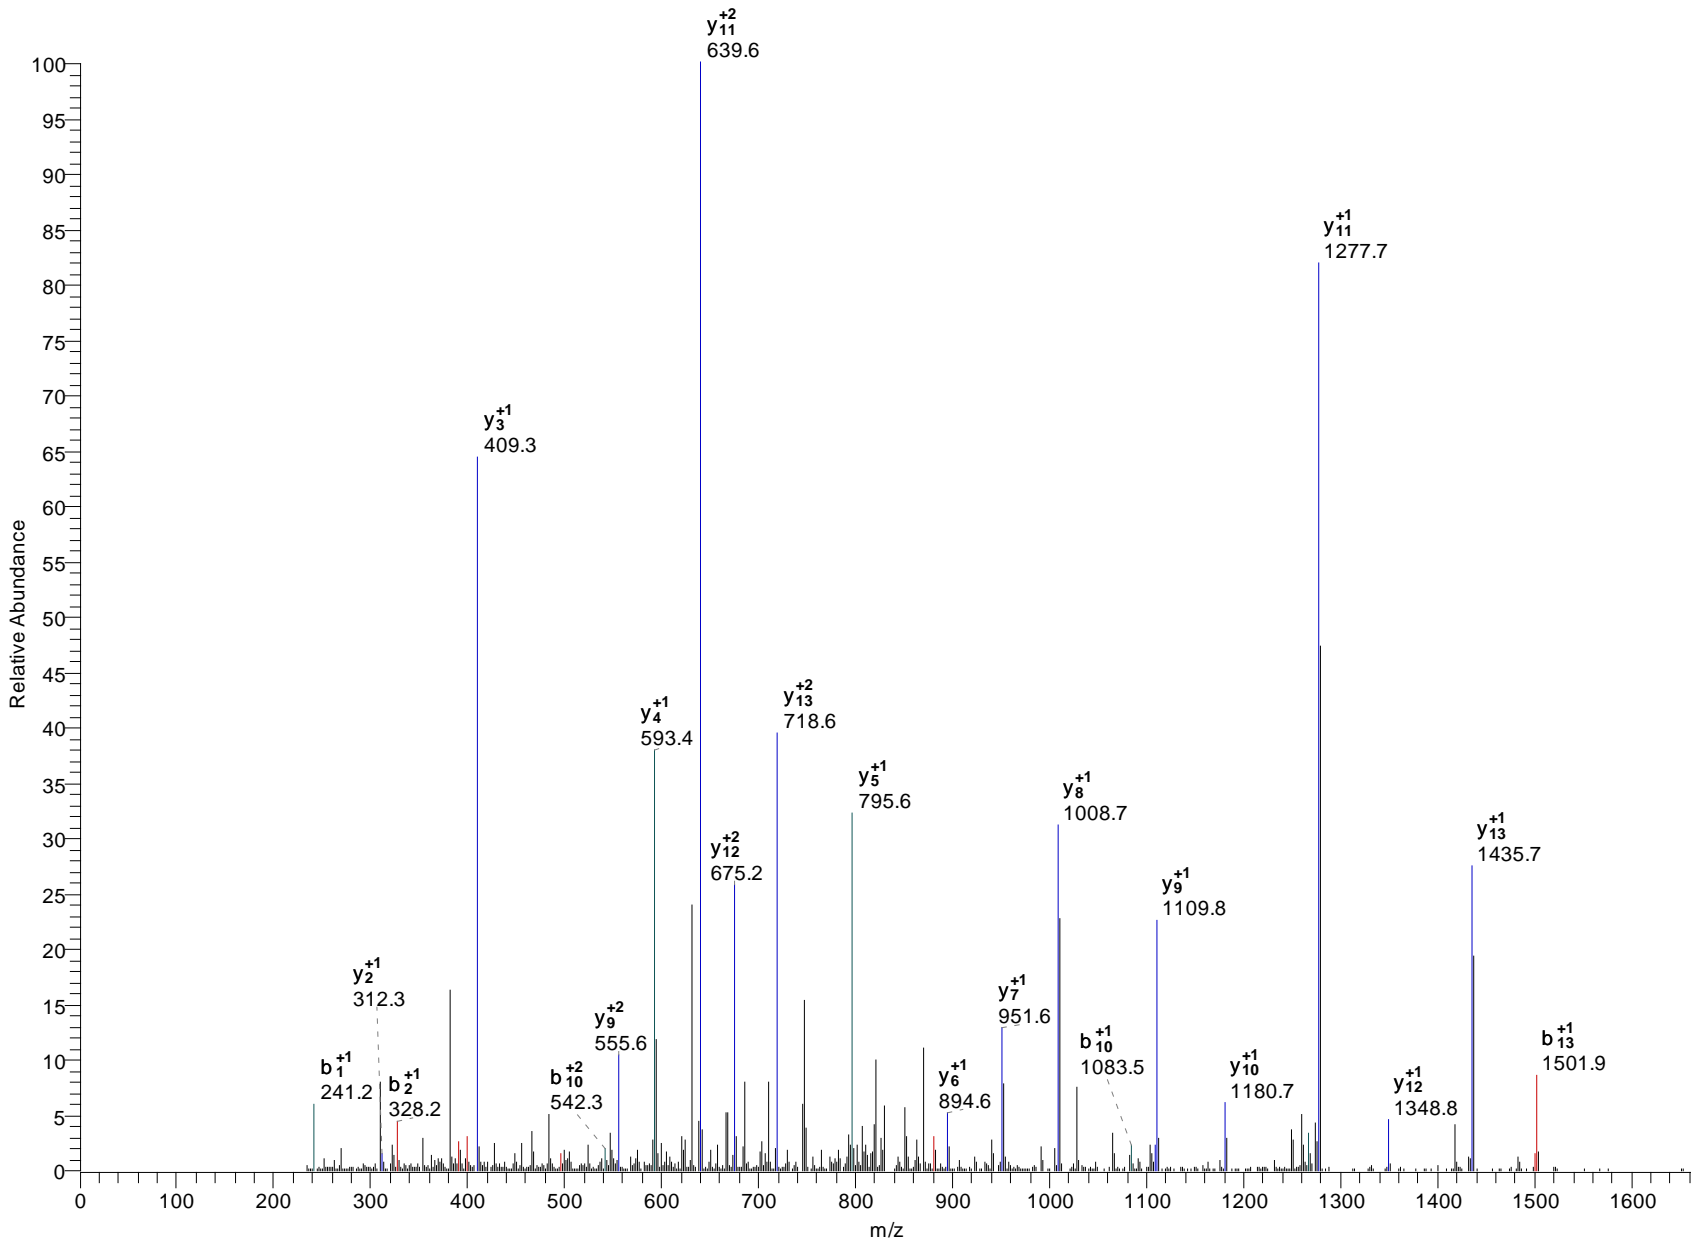

prKpr,me1:1SAPATGGVKprKprPHR

H3K27me1:1

#10688-10688 RT:71.22-71.22 NL: 1.28E4

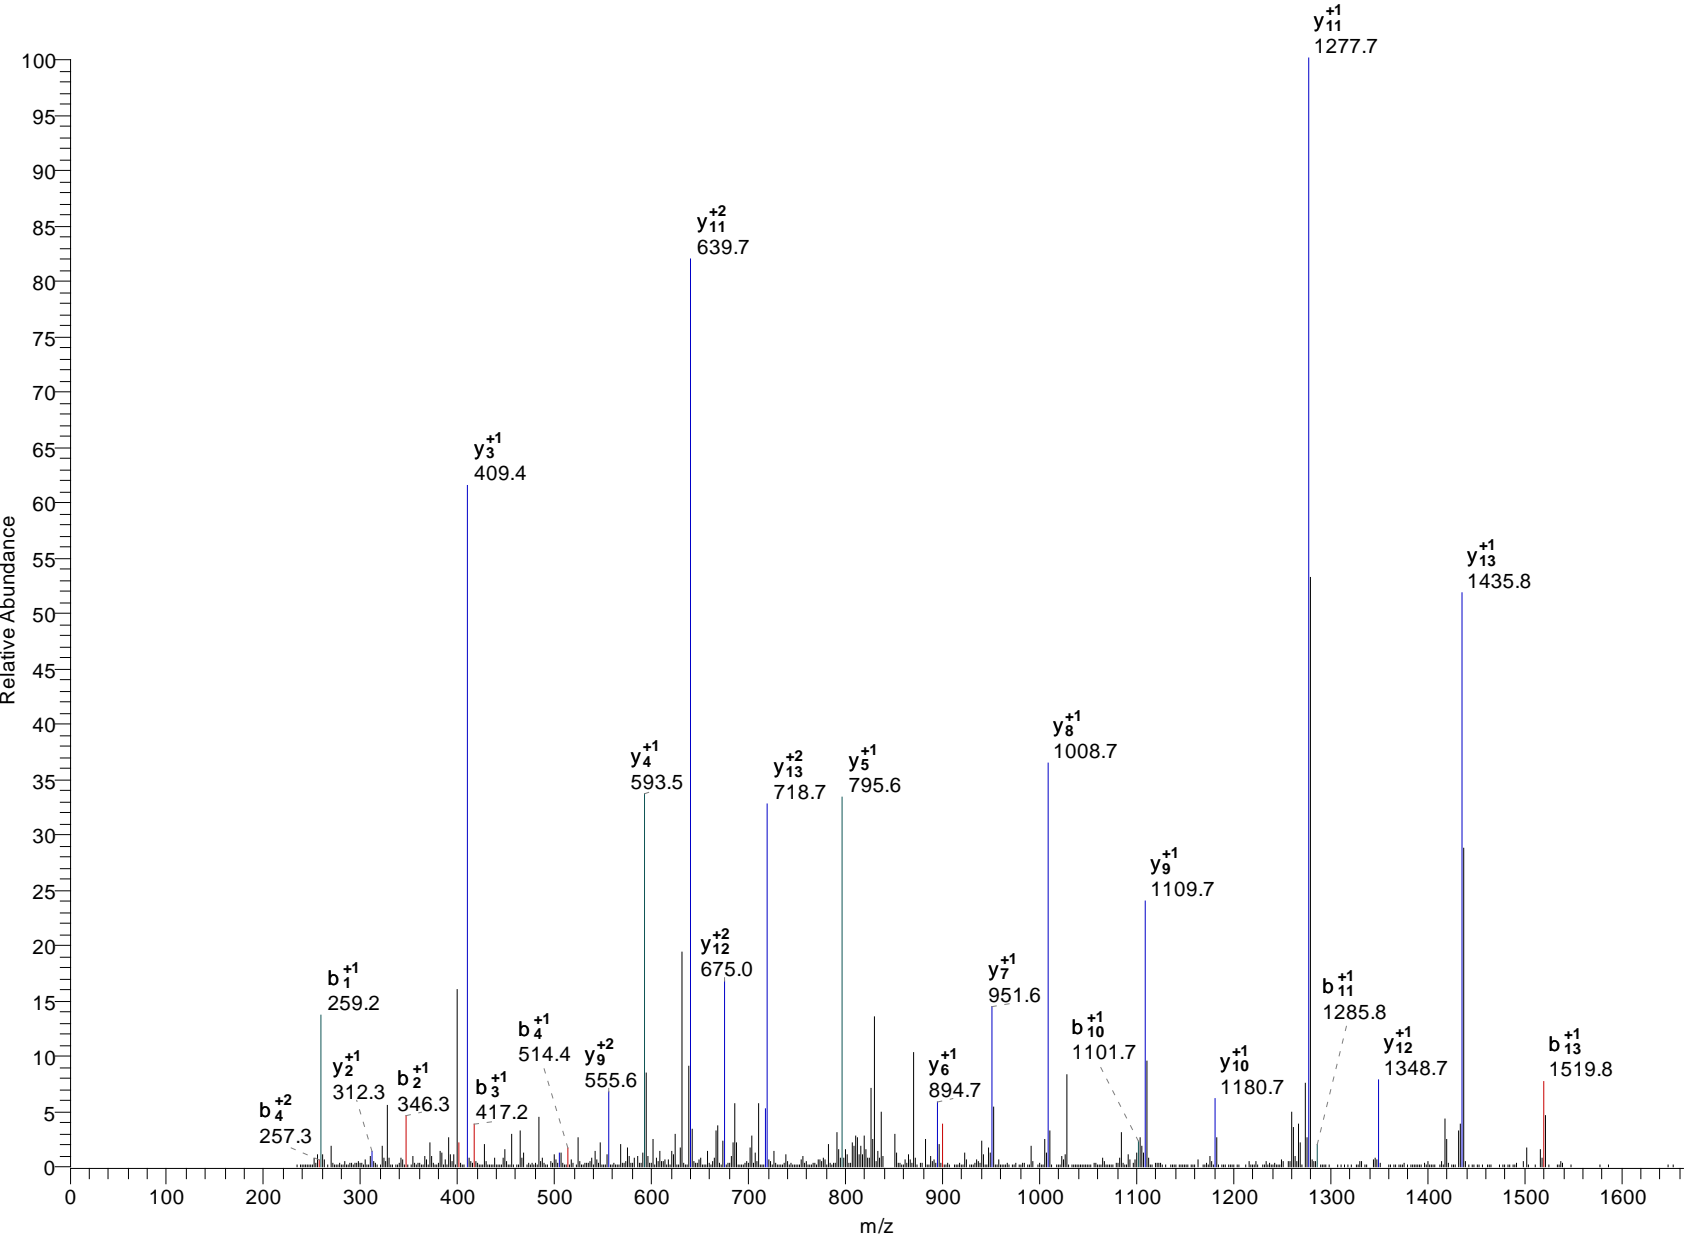

prKme2:1SAPATGGVKprKprPHR

H3K27me2:1

#7752-7752 RT:53.83-53.83 NL: 1.43E4

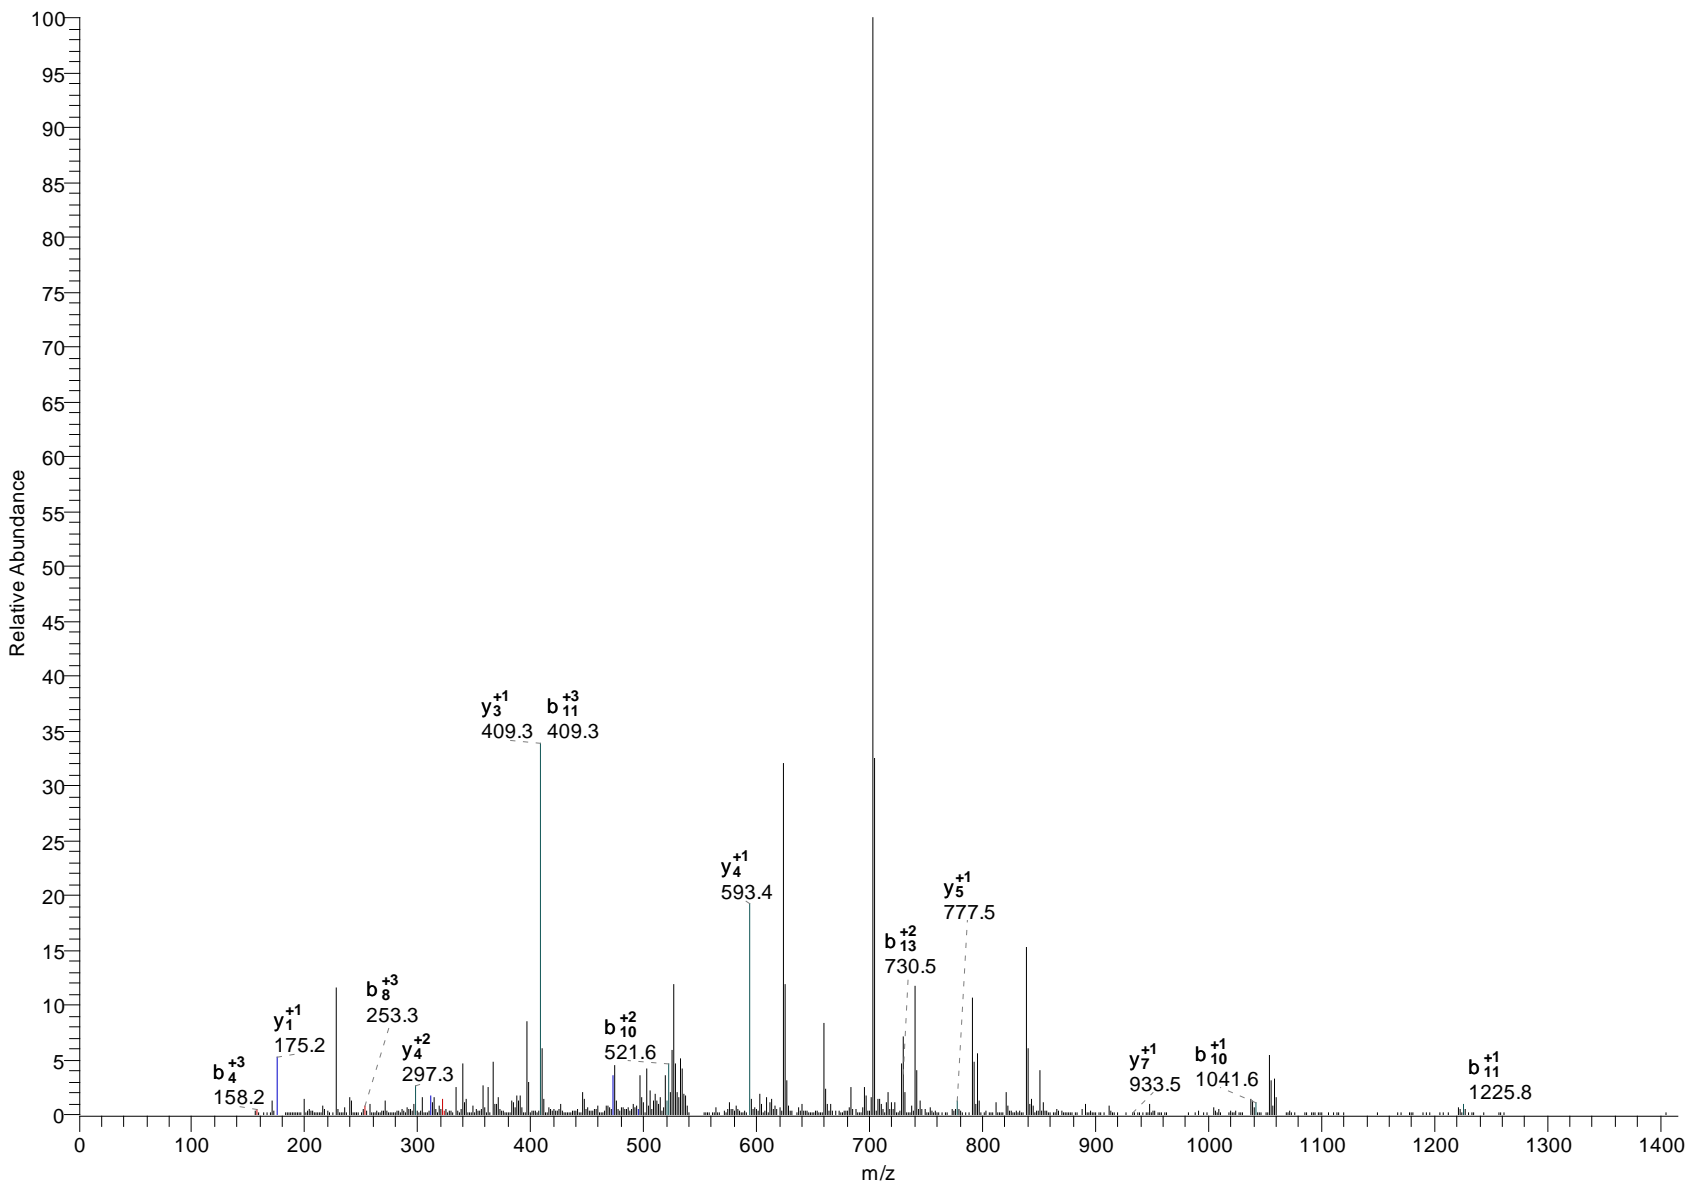



prKme2:2SAPATGGVKprKprPHR

H3K27me2:2

#8320-8320 RT:57.17-57.17 NL: 4.52E3

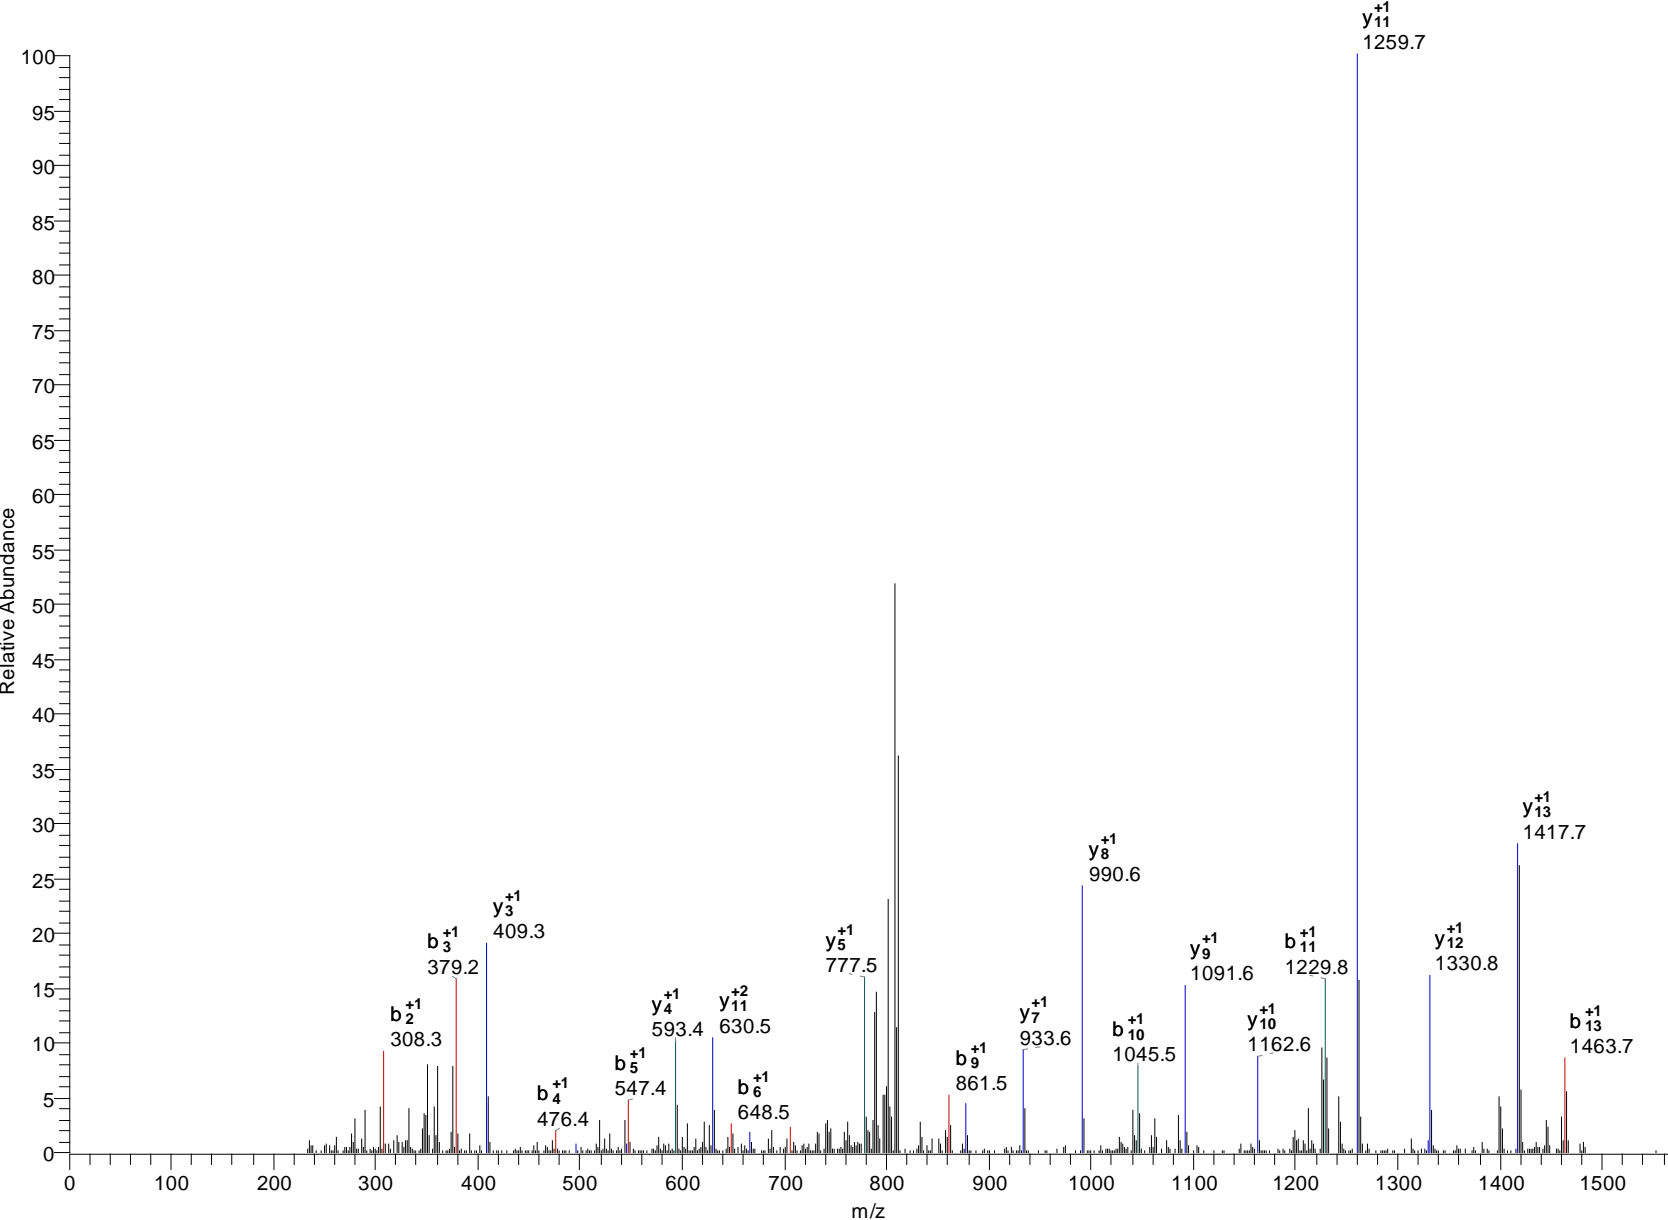

prKprSAPATGGVKme2:1KprPHR

H3K36me2:1

#8415-8415 RT:57.75-57.75 NL: 2.12E4

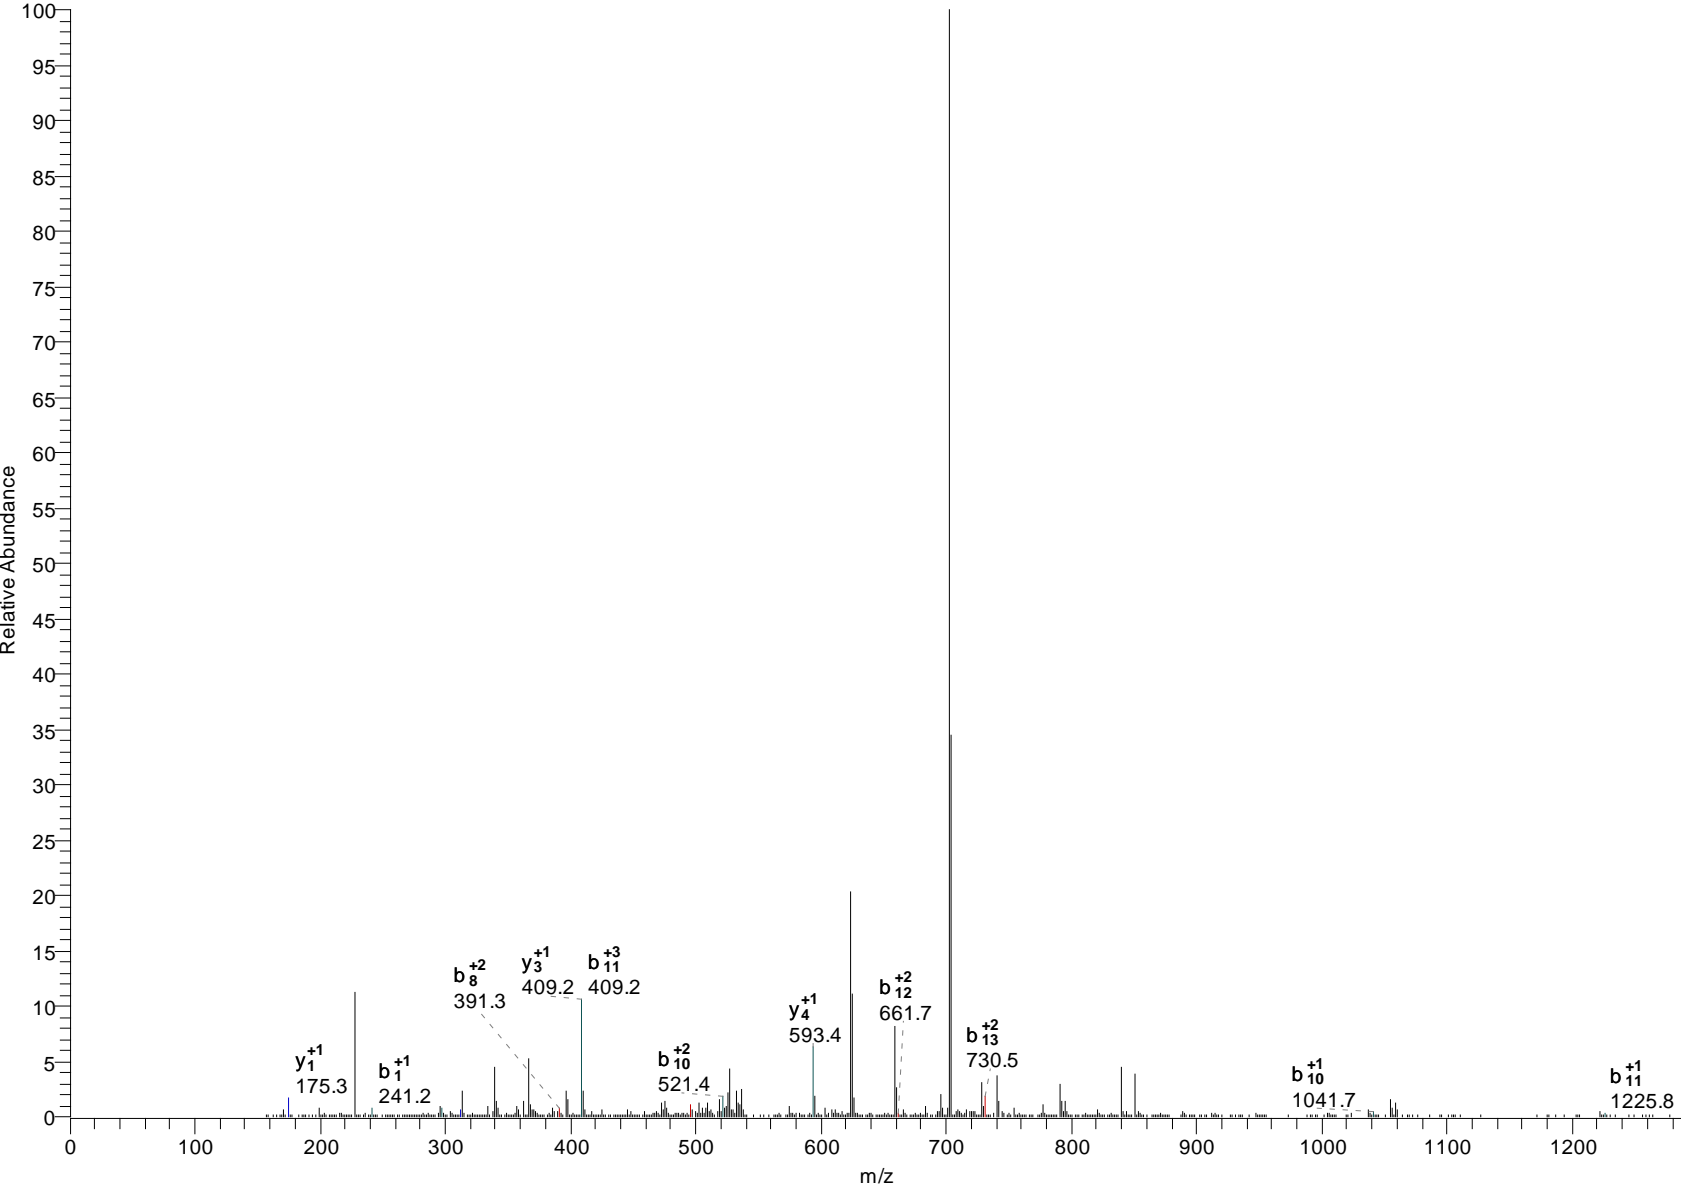

prKprSAPATGGVKme2:2KprPHR

H3K36me2:2

#8054-8054 RT:55.62-55.62 NL: 7.57E3

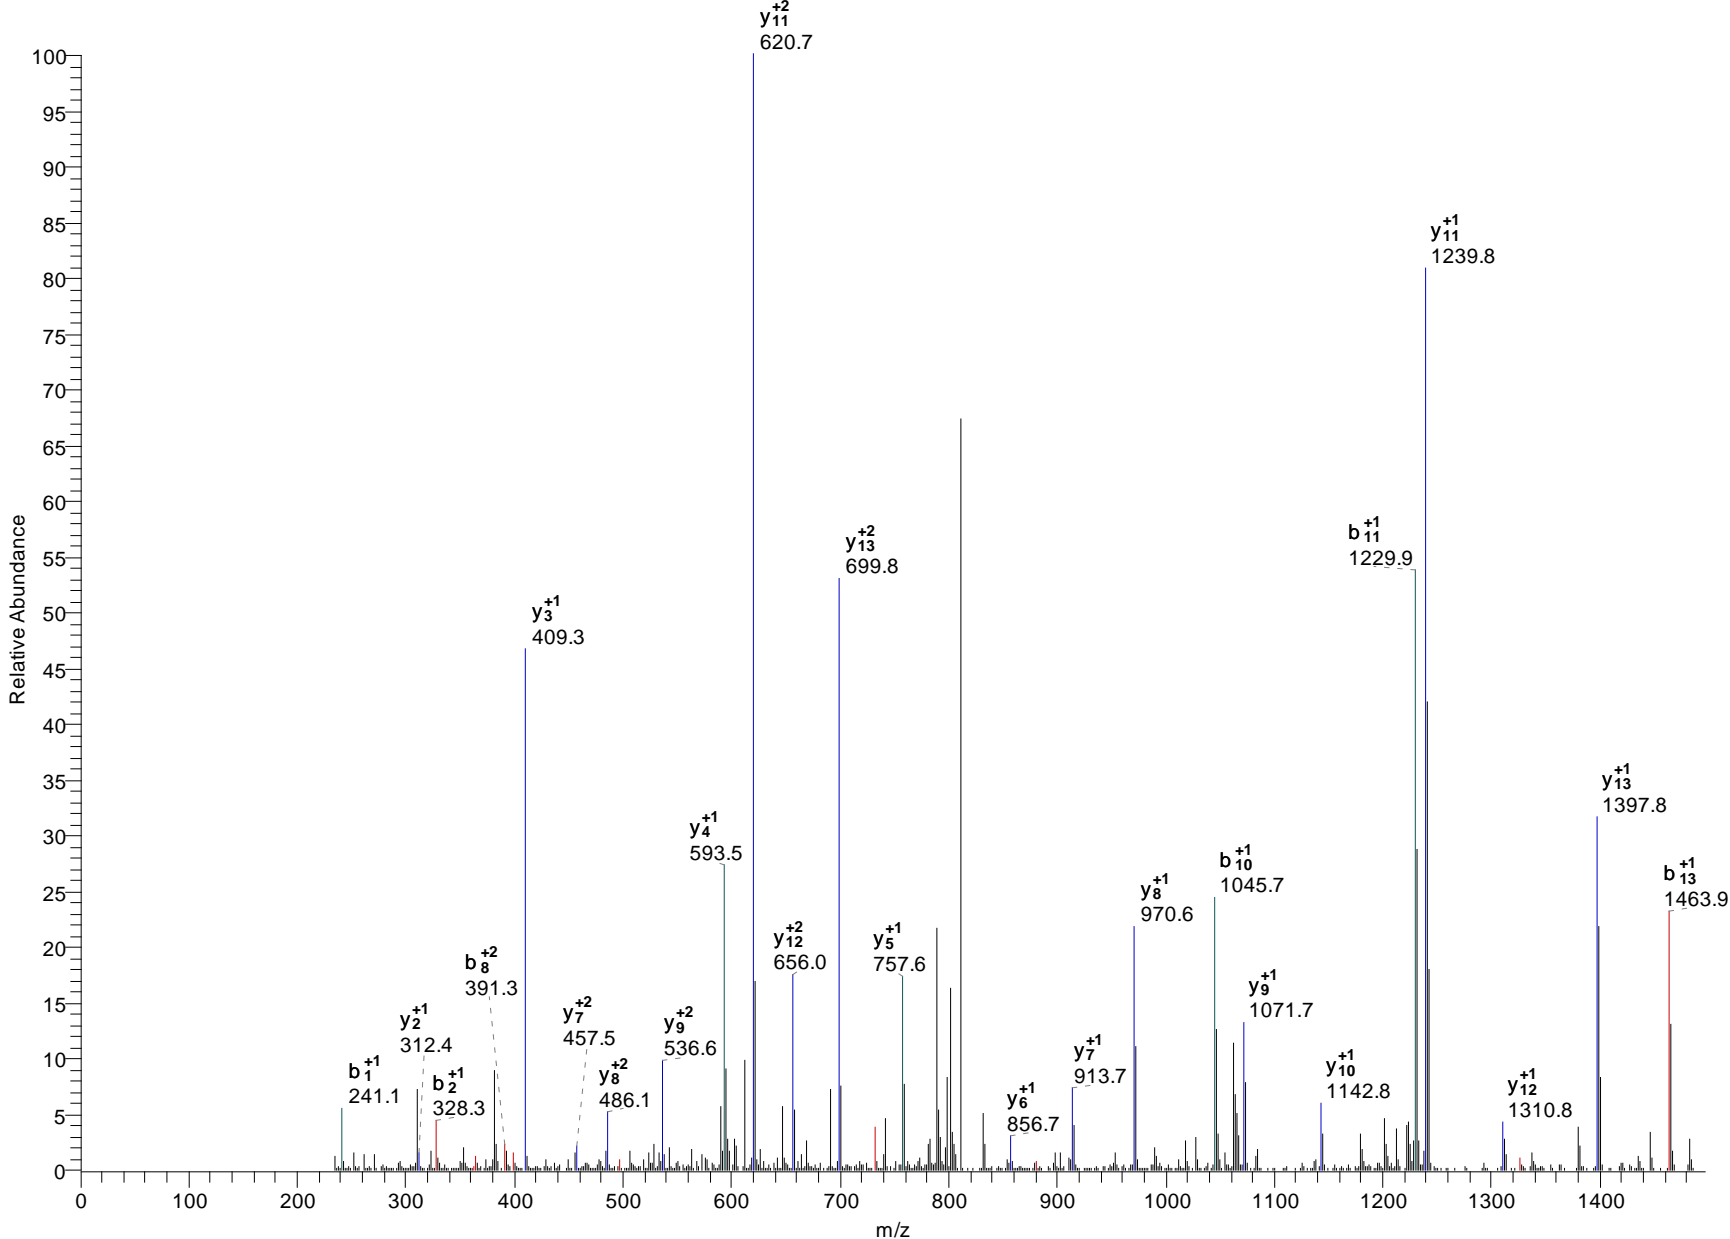

prKpr,me1:1SAPATGGVKpr,me1:0KprPHR

H3K27me1:1K36me1:0

#9492-9492 RT:64.14-64.14 NL: 2.61E3

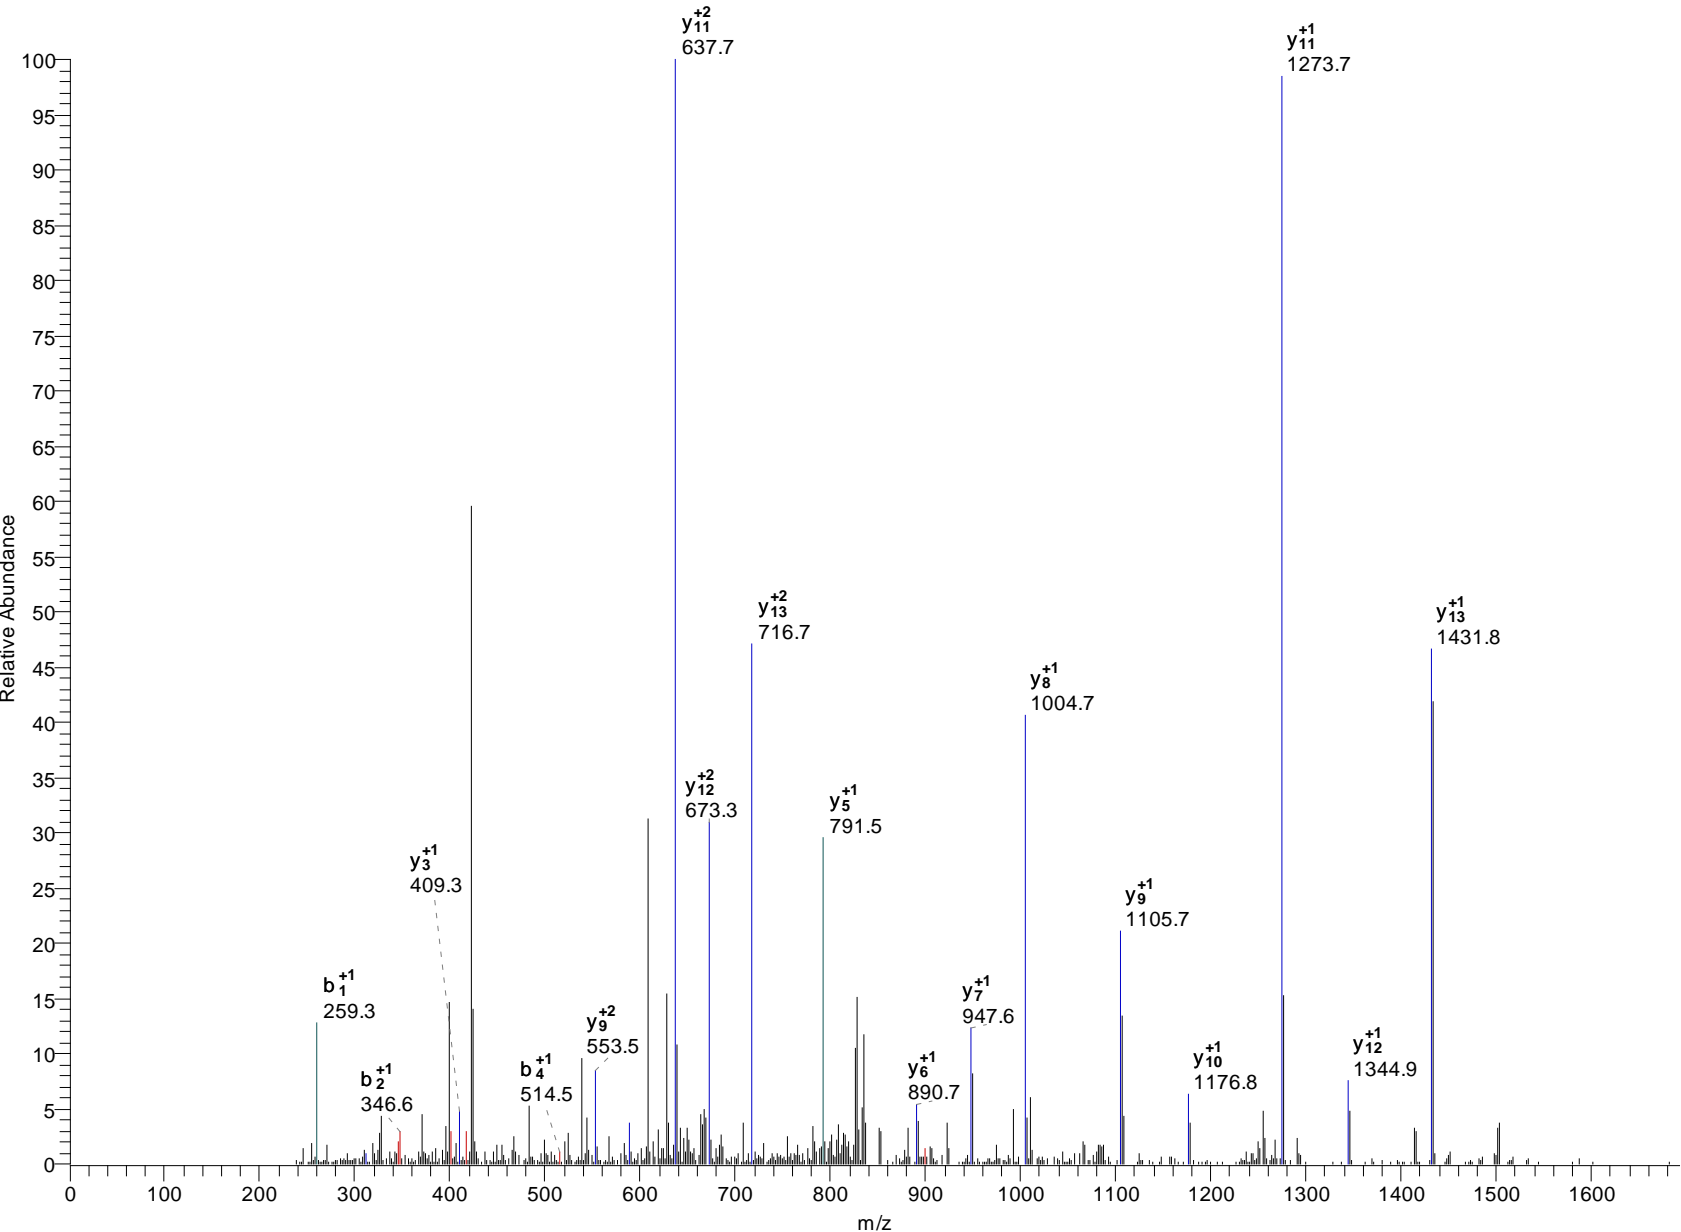

# prKpr,me1:1SAPATGGVKpr,me1:1KprPHR

#10074-10074 RT:67.58-67.58 NL: 7.92E4

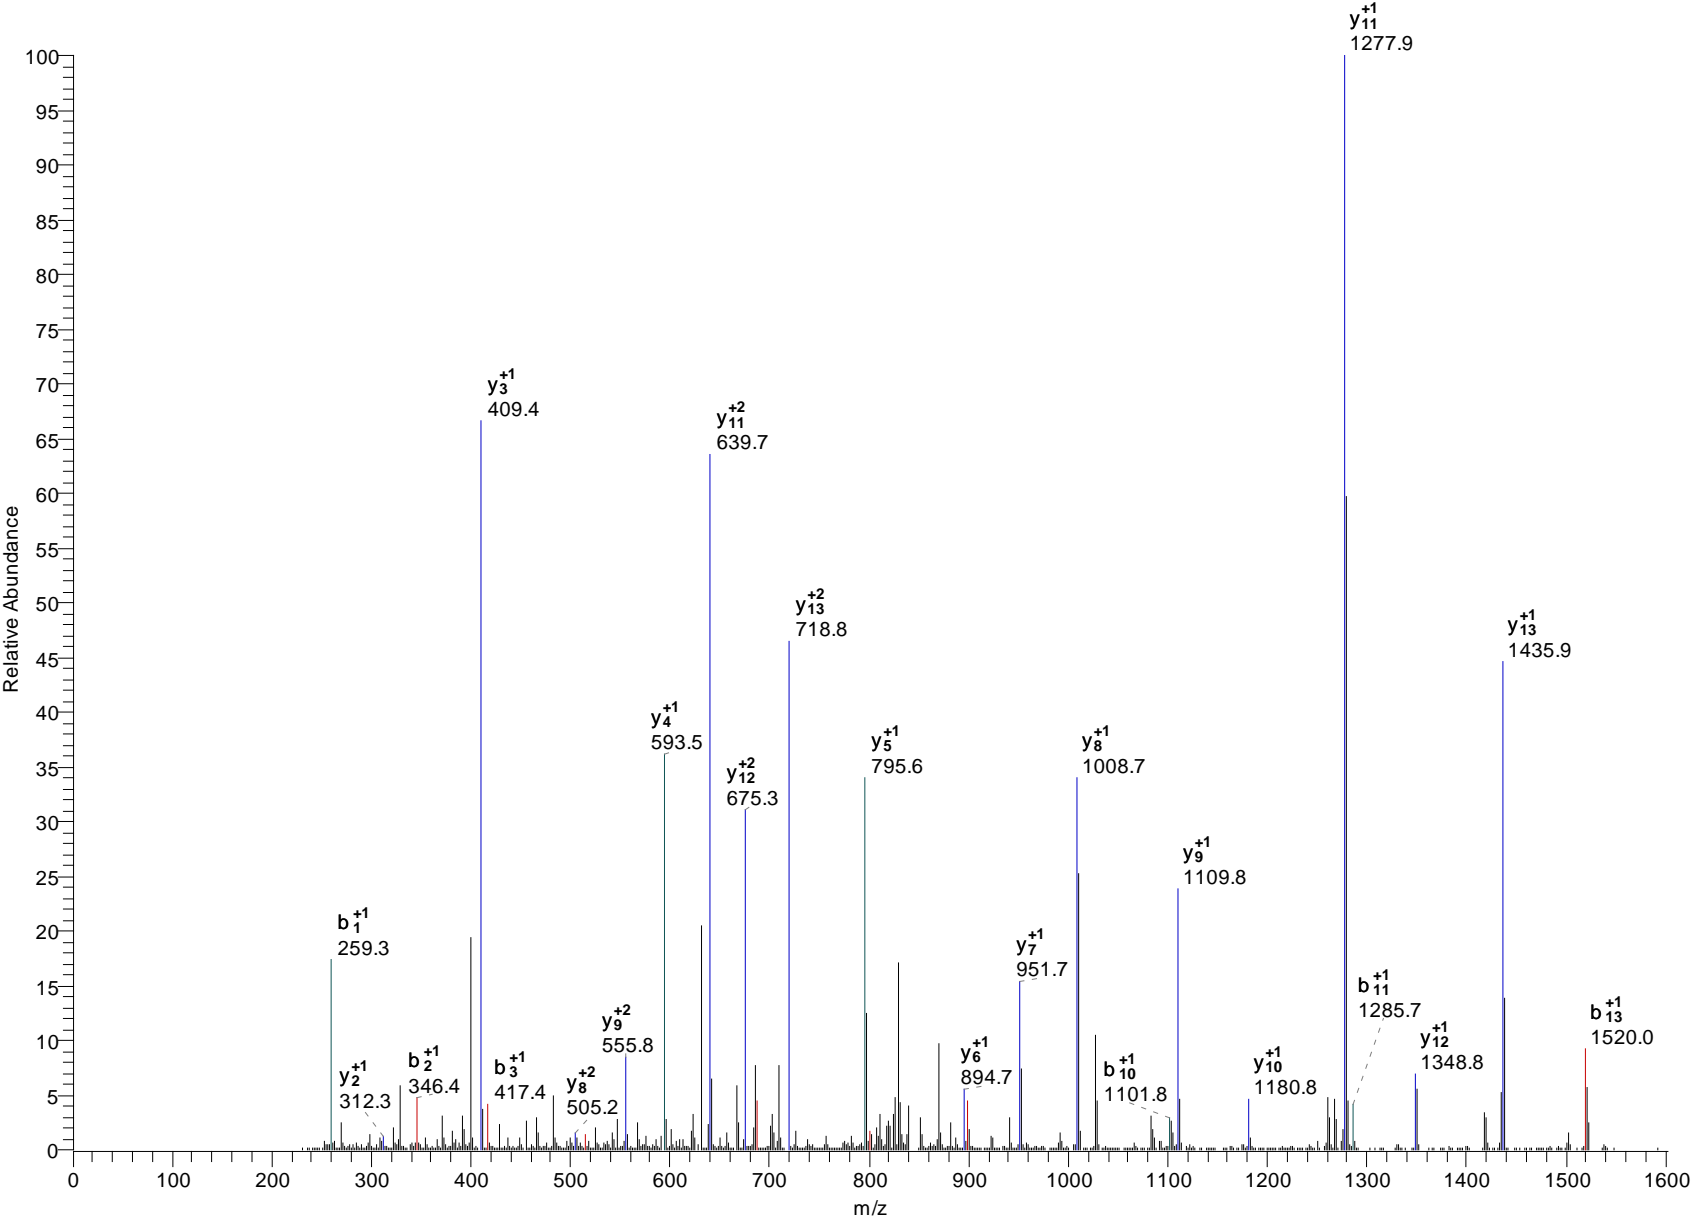

prKme3:1SAPATGGVKprKprPHR

H3K27me3:1

#7598-7598 RT:52.91-52.91 NL: 5.33E4

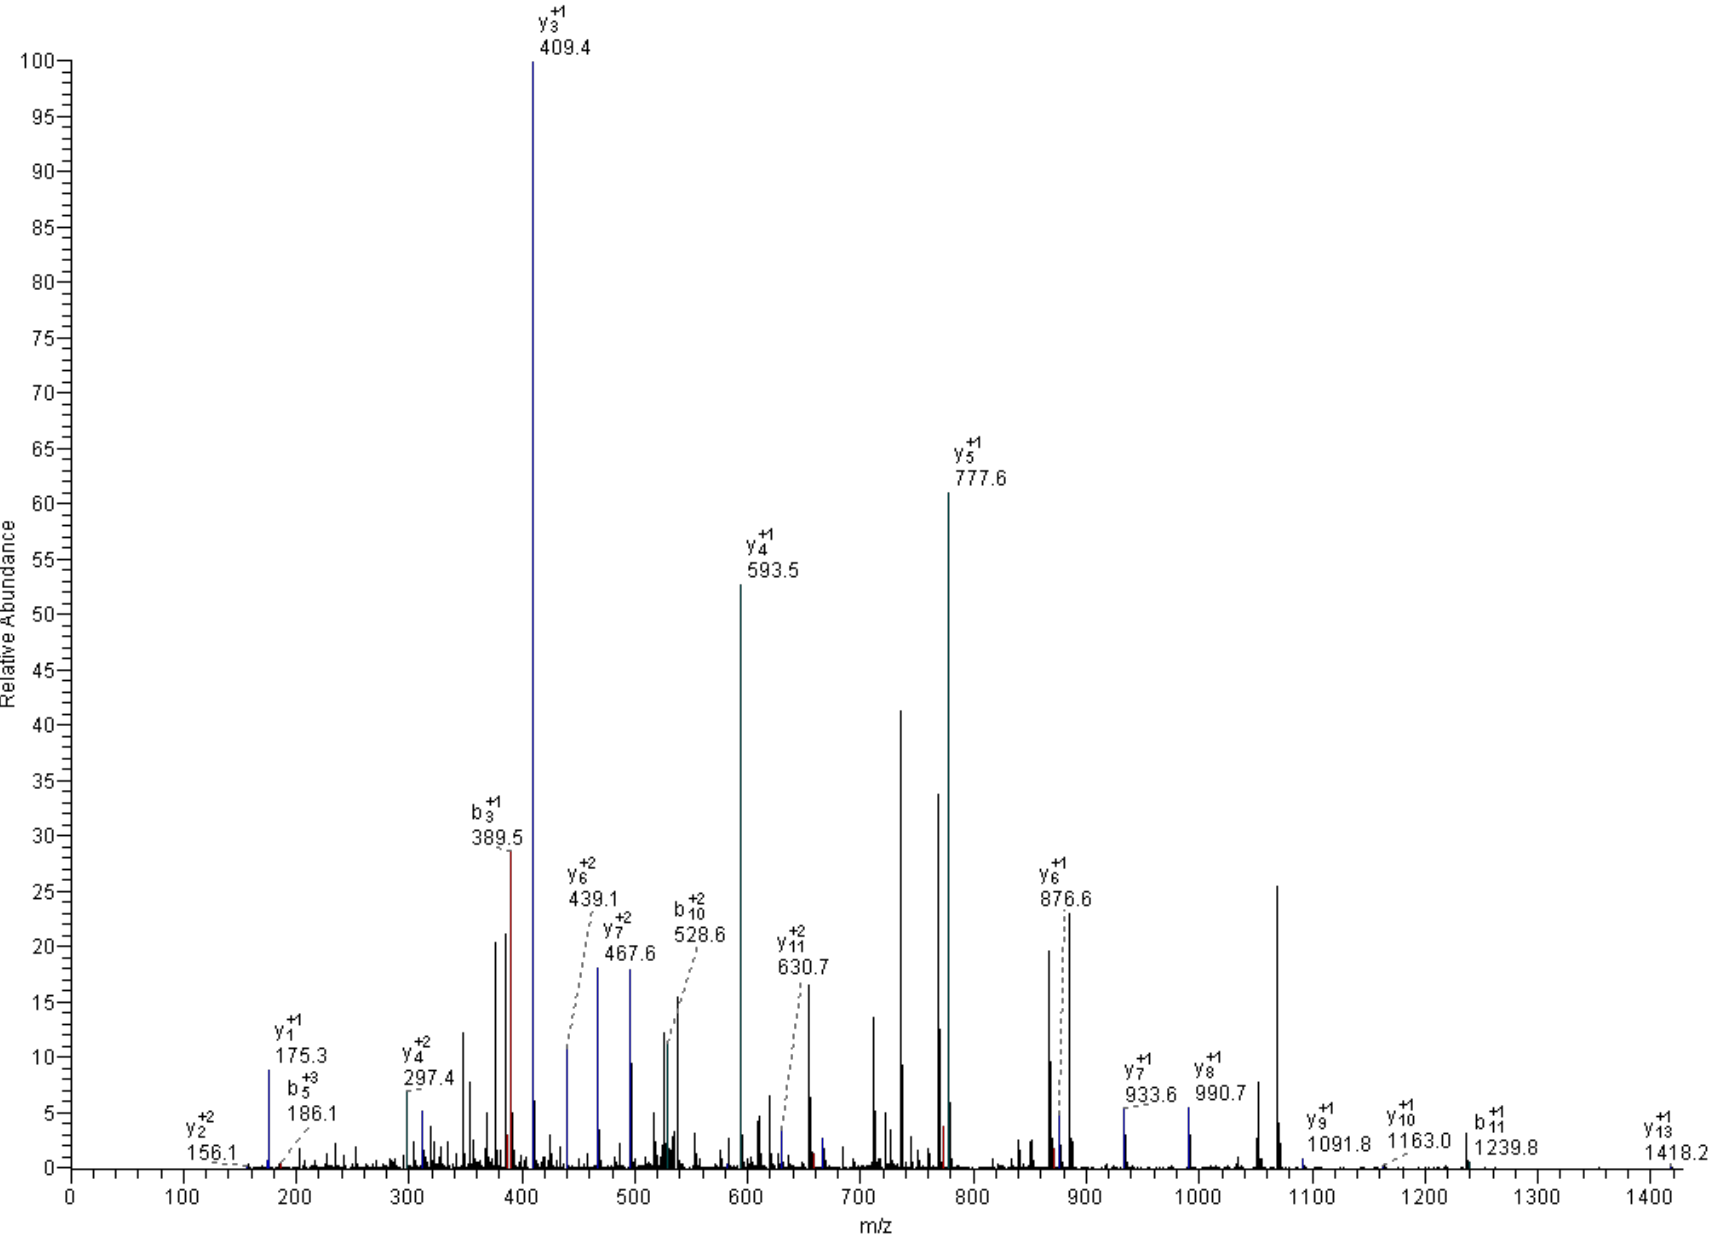

prKme2:0SAPATGGVKpr,me1:1KprPHR H3K27me2:0K36me1:1

#8620-8620 RT:58.97-58.97 NL: 6.47E3

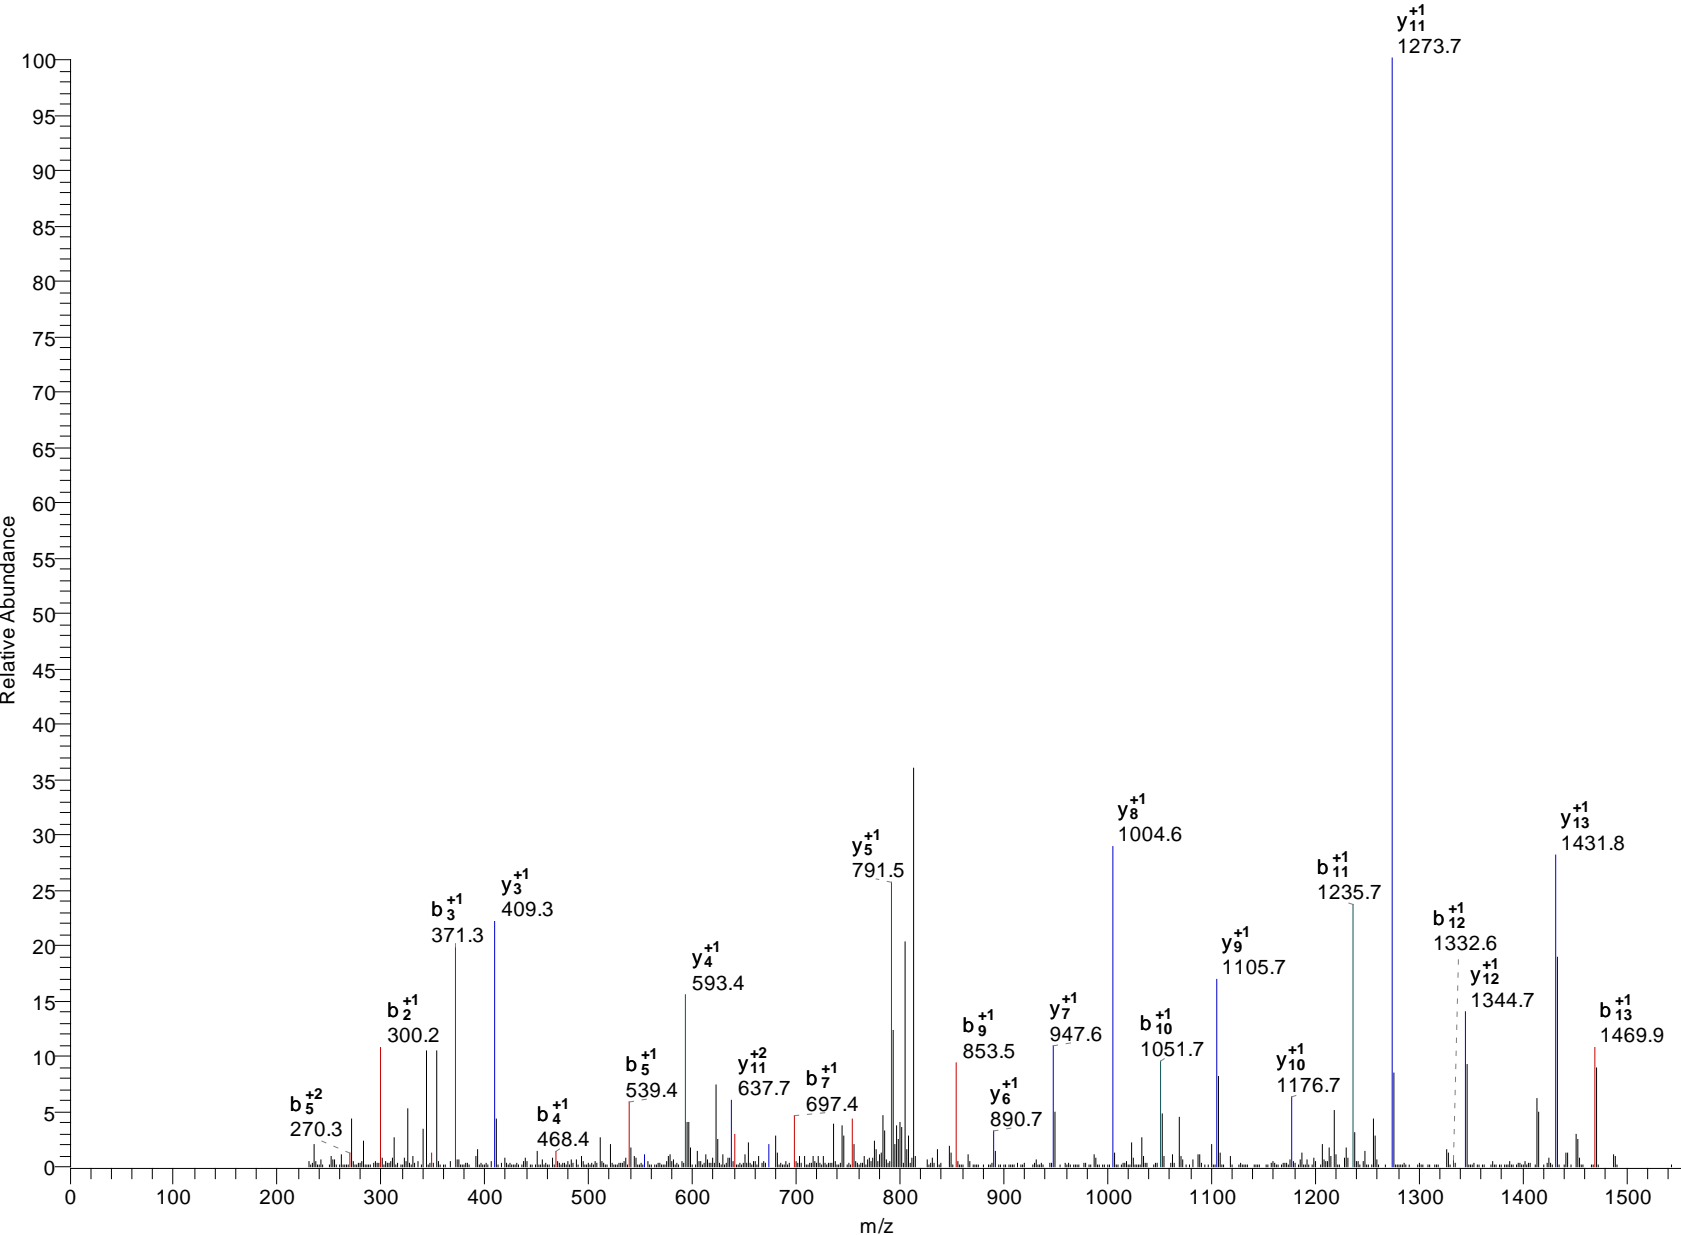

prKpr,me1:1SAPATGGVKme2:0KprPHR H3K27me1:1K36me2:0

#9190-9190 RT:62.34-62.34 NL: 3.71E3

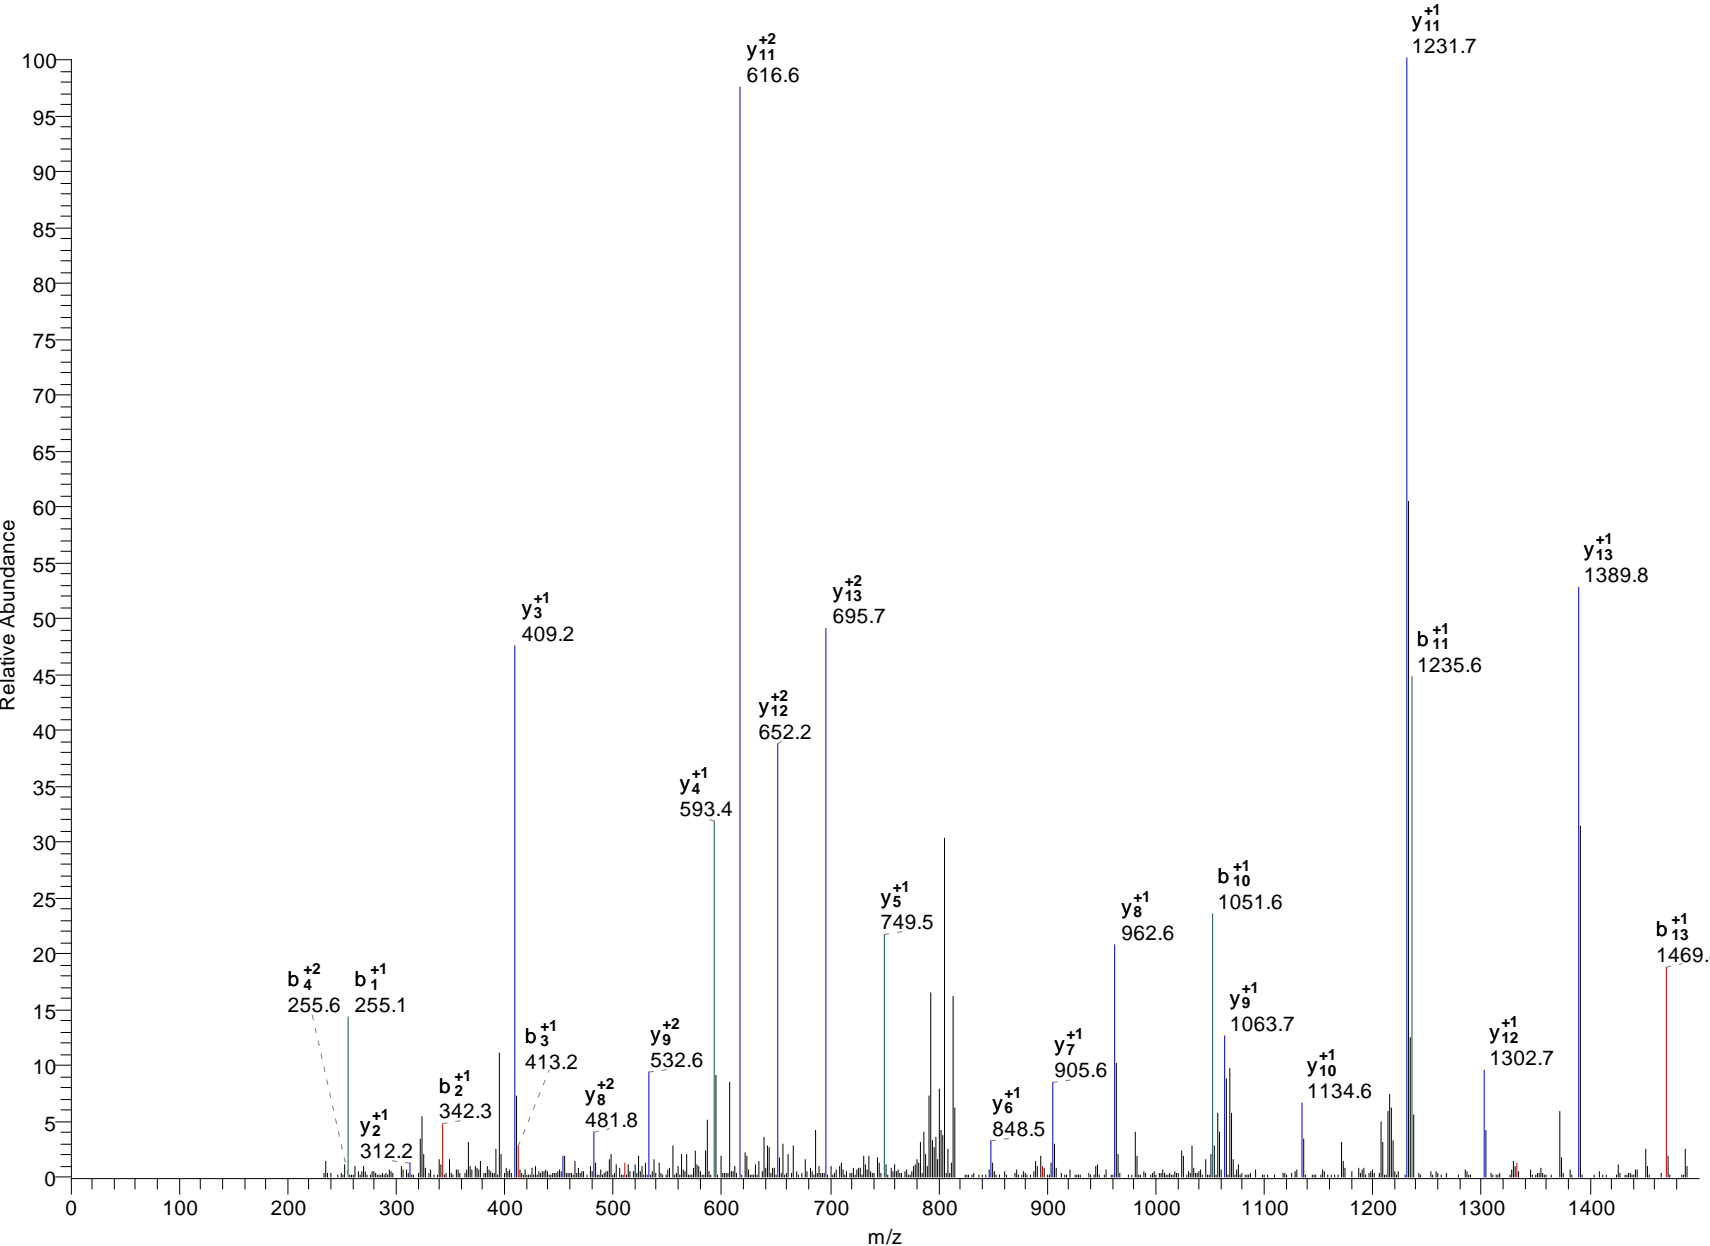



prKme3:2SAPATGGVKprKprPHR

H3K27me3:2

#7502-7502 RT:52.36-52.36 NL: 4.52E4

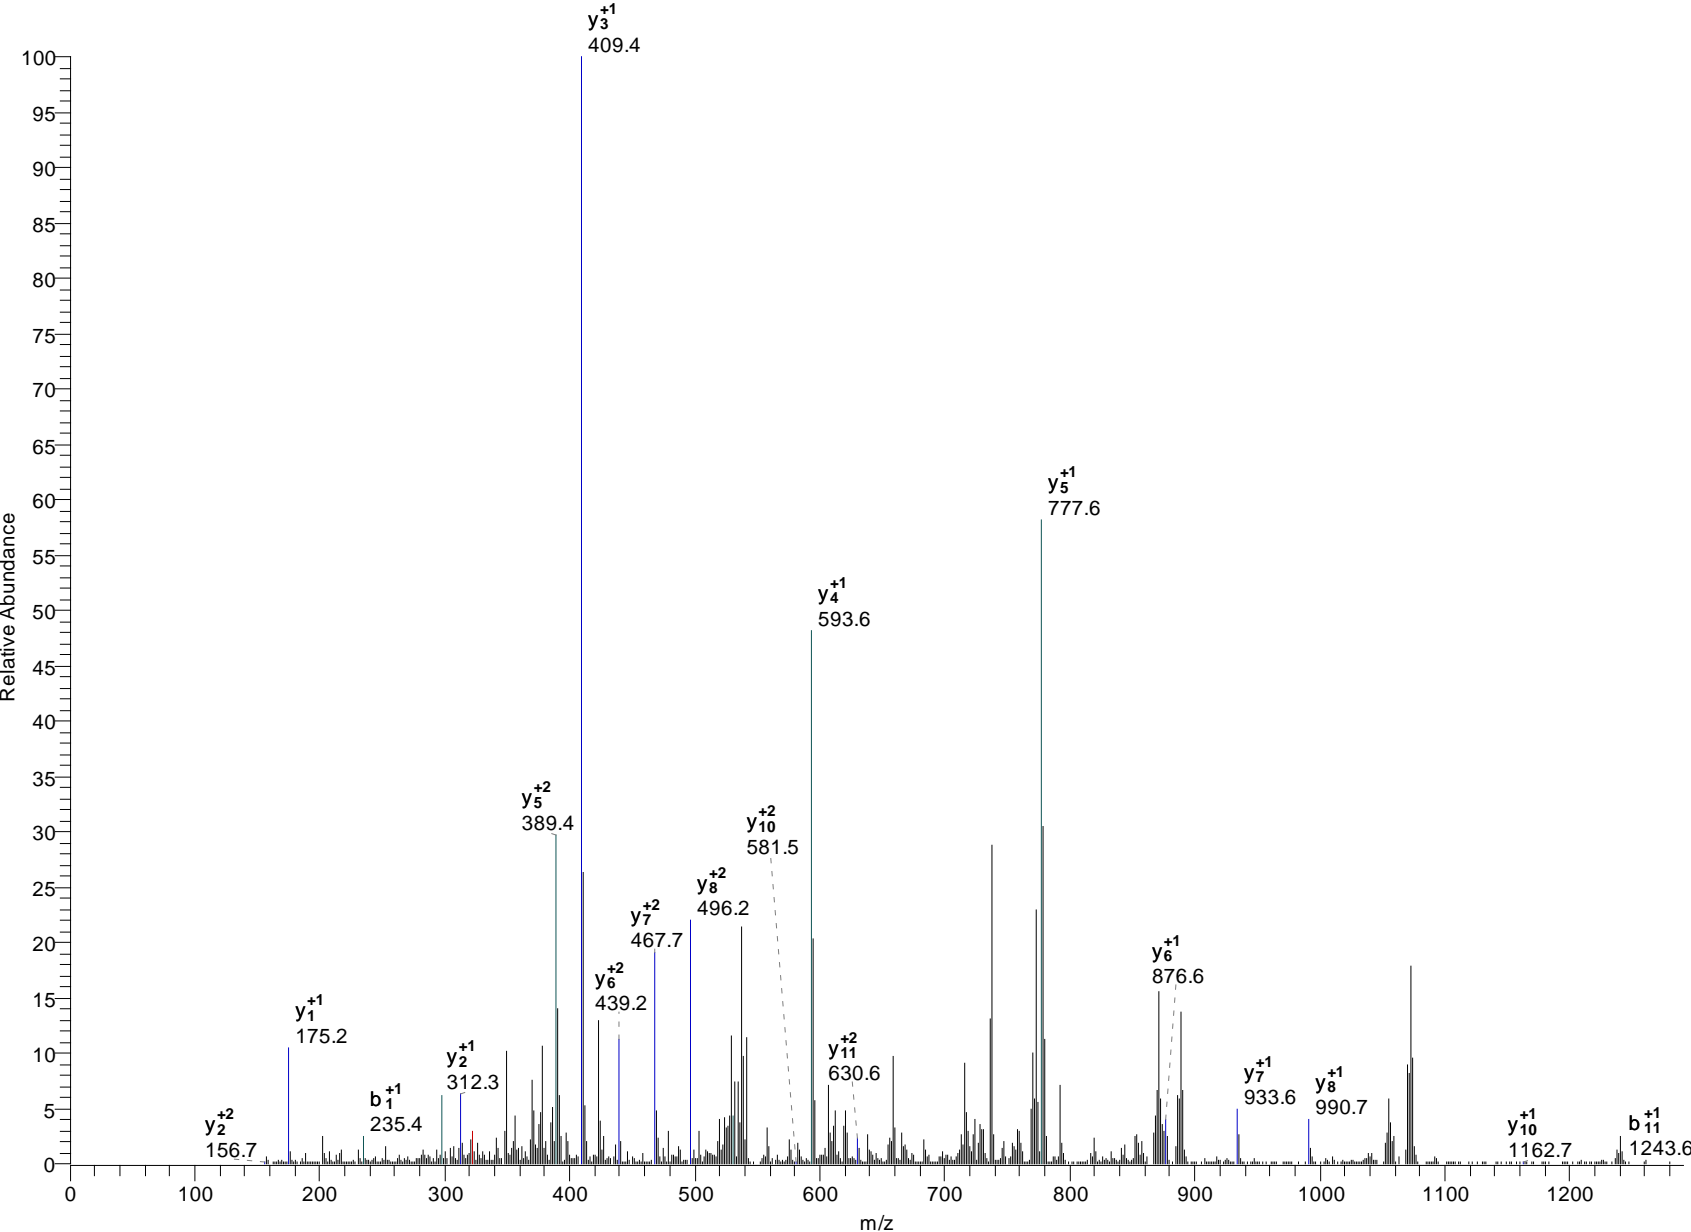

prKme2:1SAPATGGVKpr,me1:1KprPHR H3K27me2:1K36me1:1

#7975-7975 RT:55.15-55.15 NL: 6.11E3

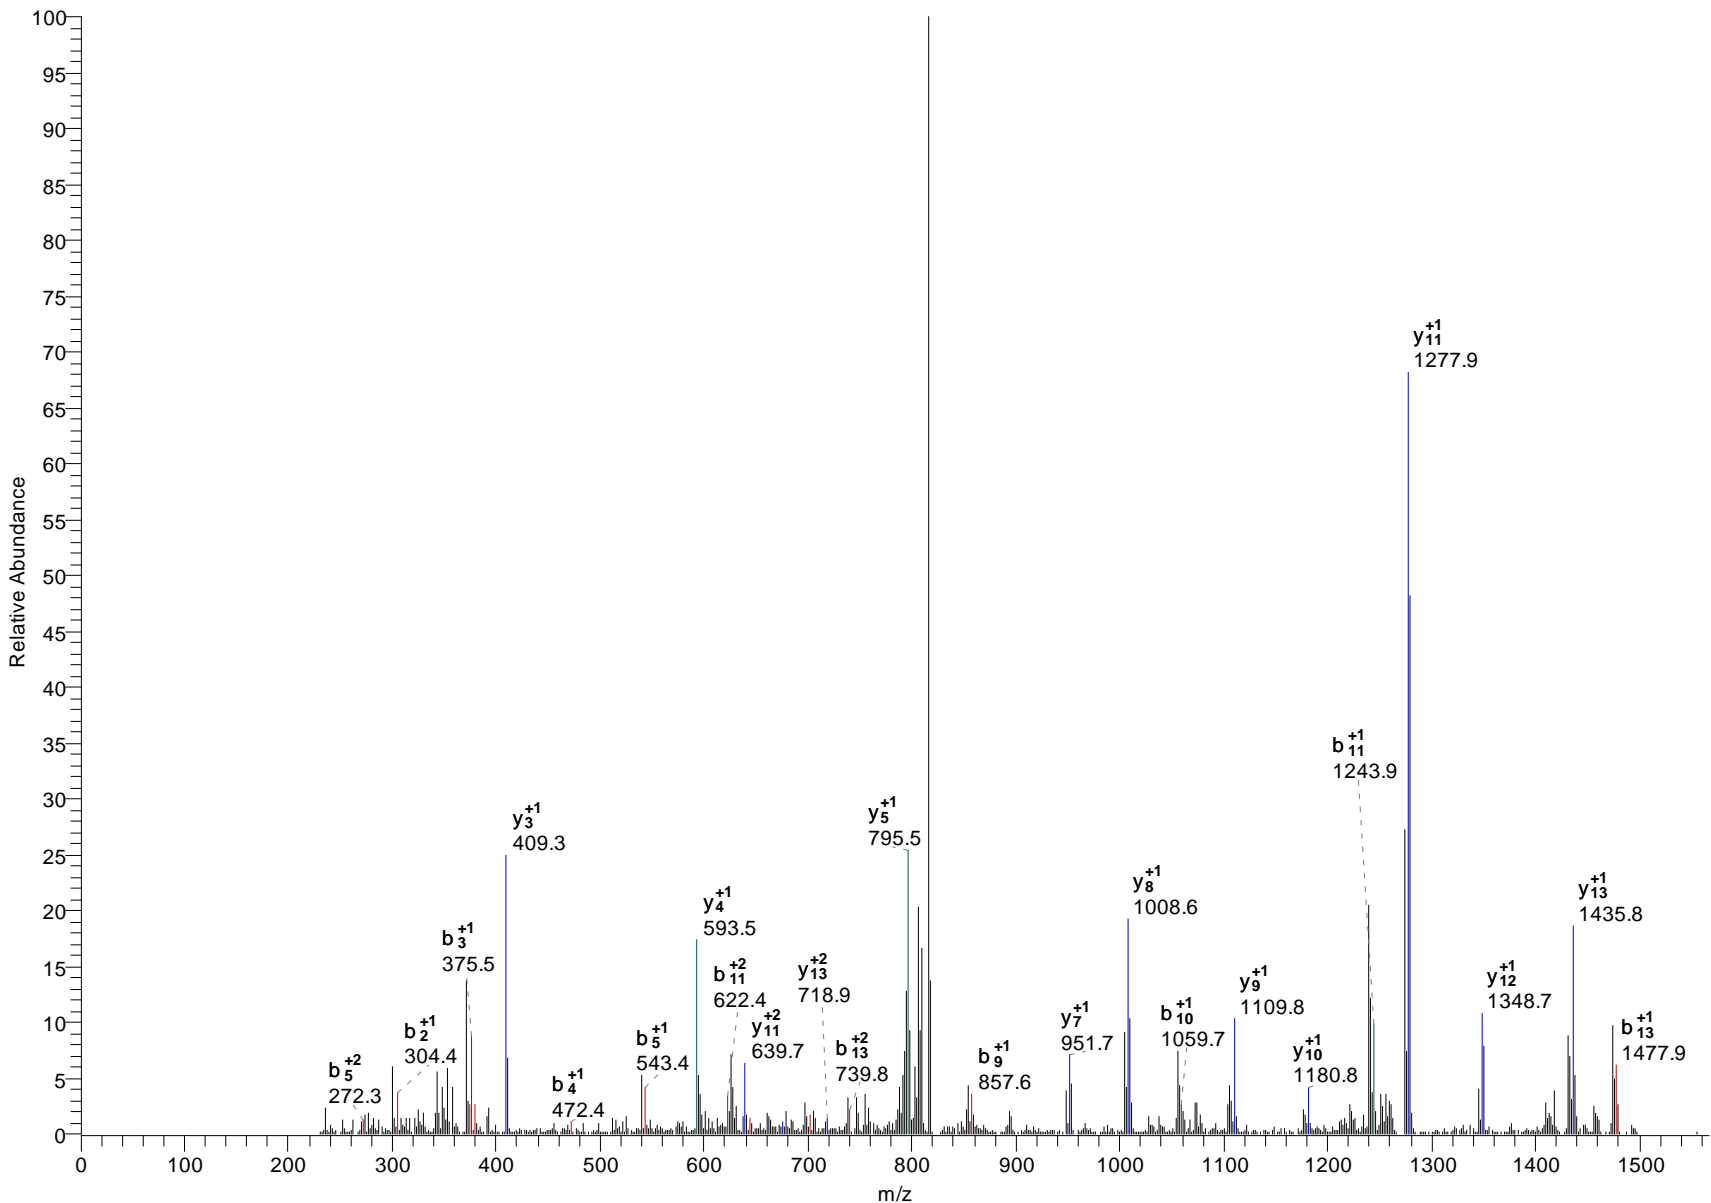

prKpr,me1:1SAPATGGVKme2:1KprPHR H3K27me1:1K36me2:1

#8560-8560 RT:58.62-58.62 NL: 3.37E3

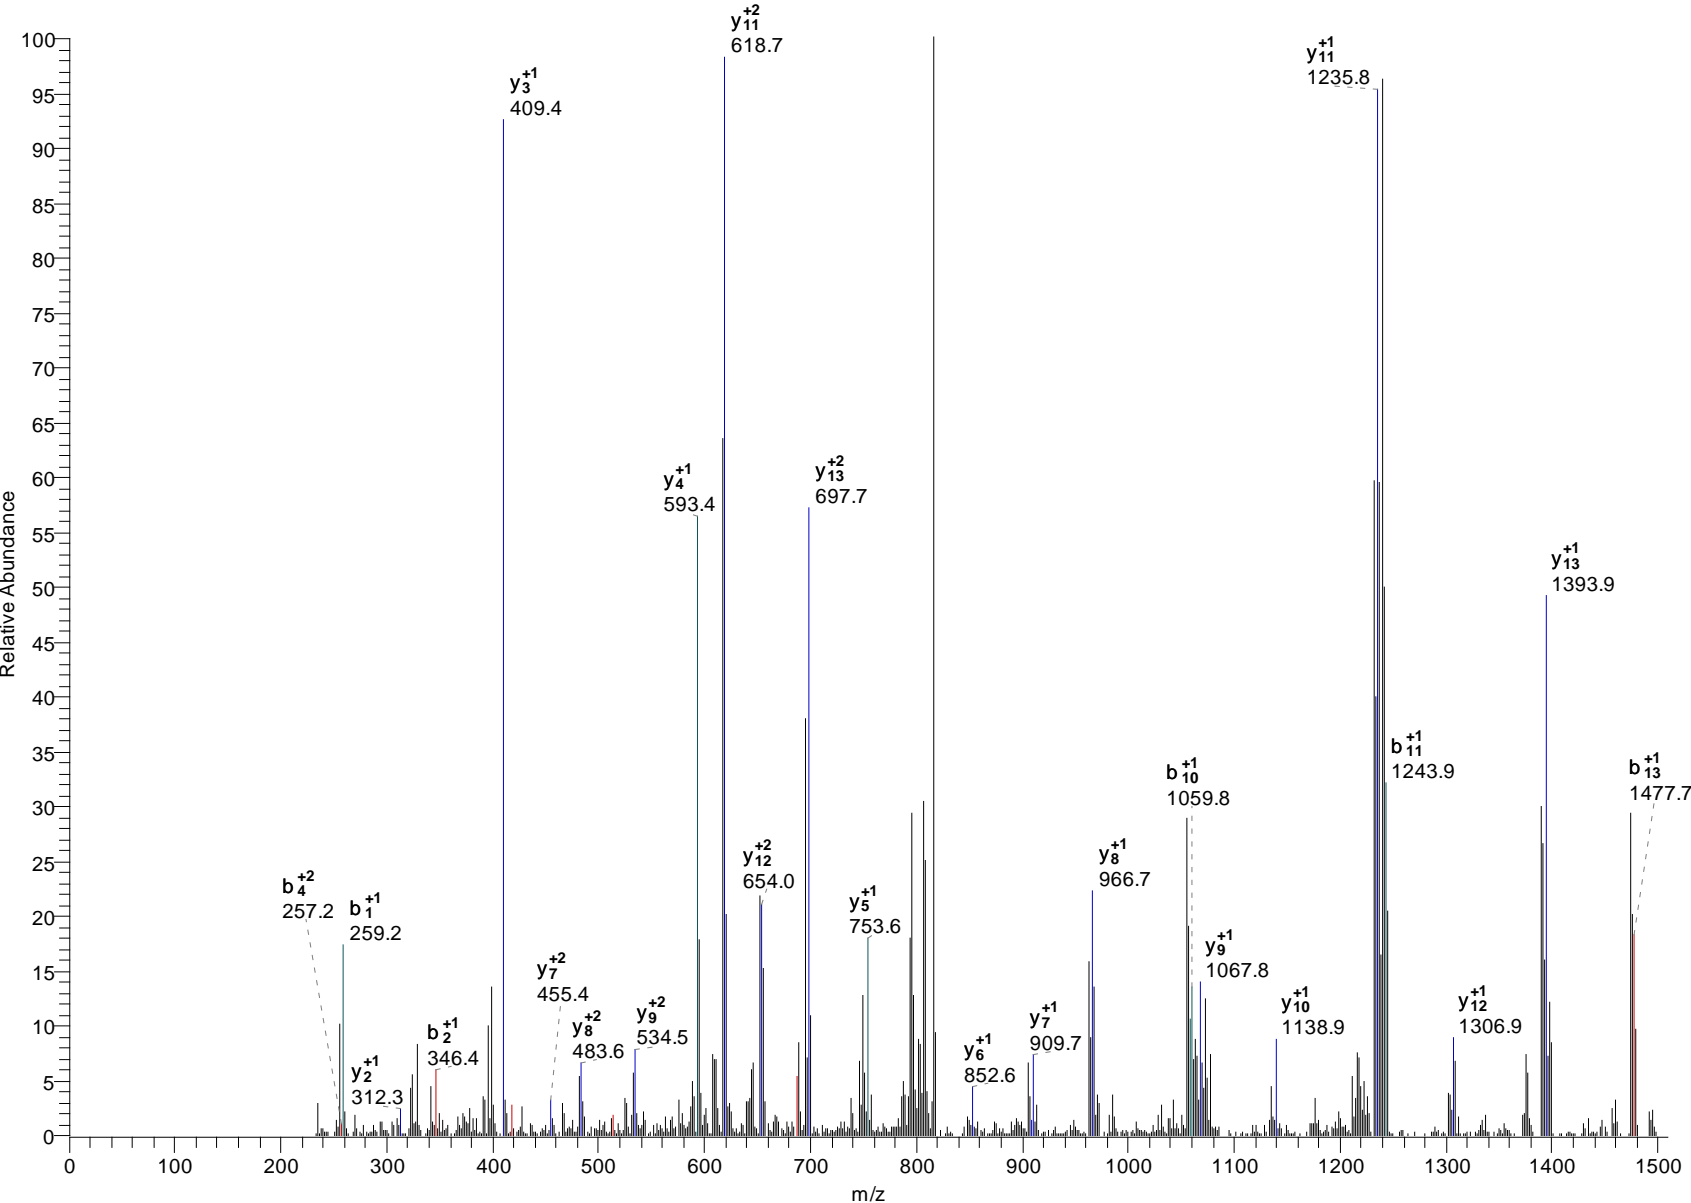

prKme3:3SAPATGGVKprKprPHR

H3K27me3:3

#7547-7547 RT:52.62-52.62 NL: 1.03E3

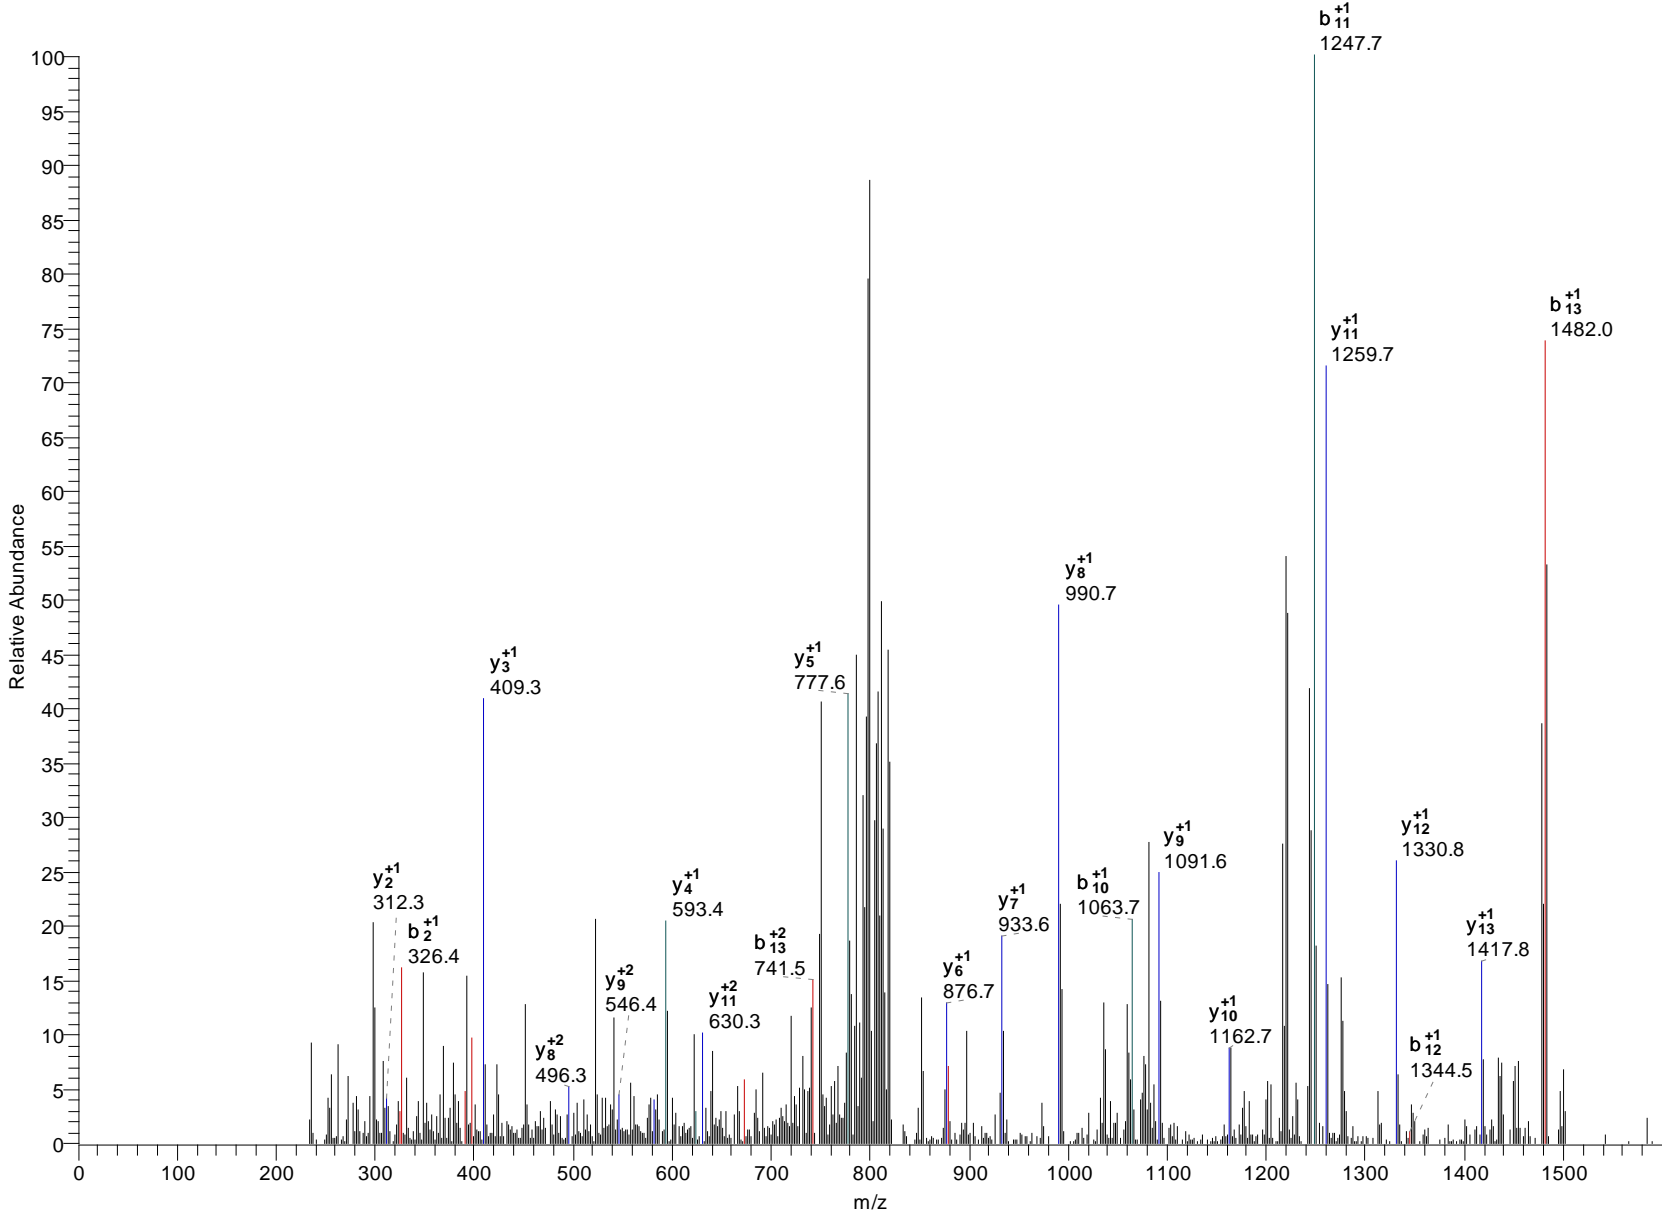

prKme2:2SAPATGGVKpr,me1:1KprPHR H3K27me2:2K36me1:1

#7964-7964 RT:55.09-55.09 NL: 7.39E3

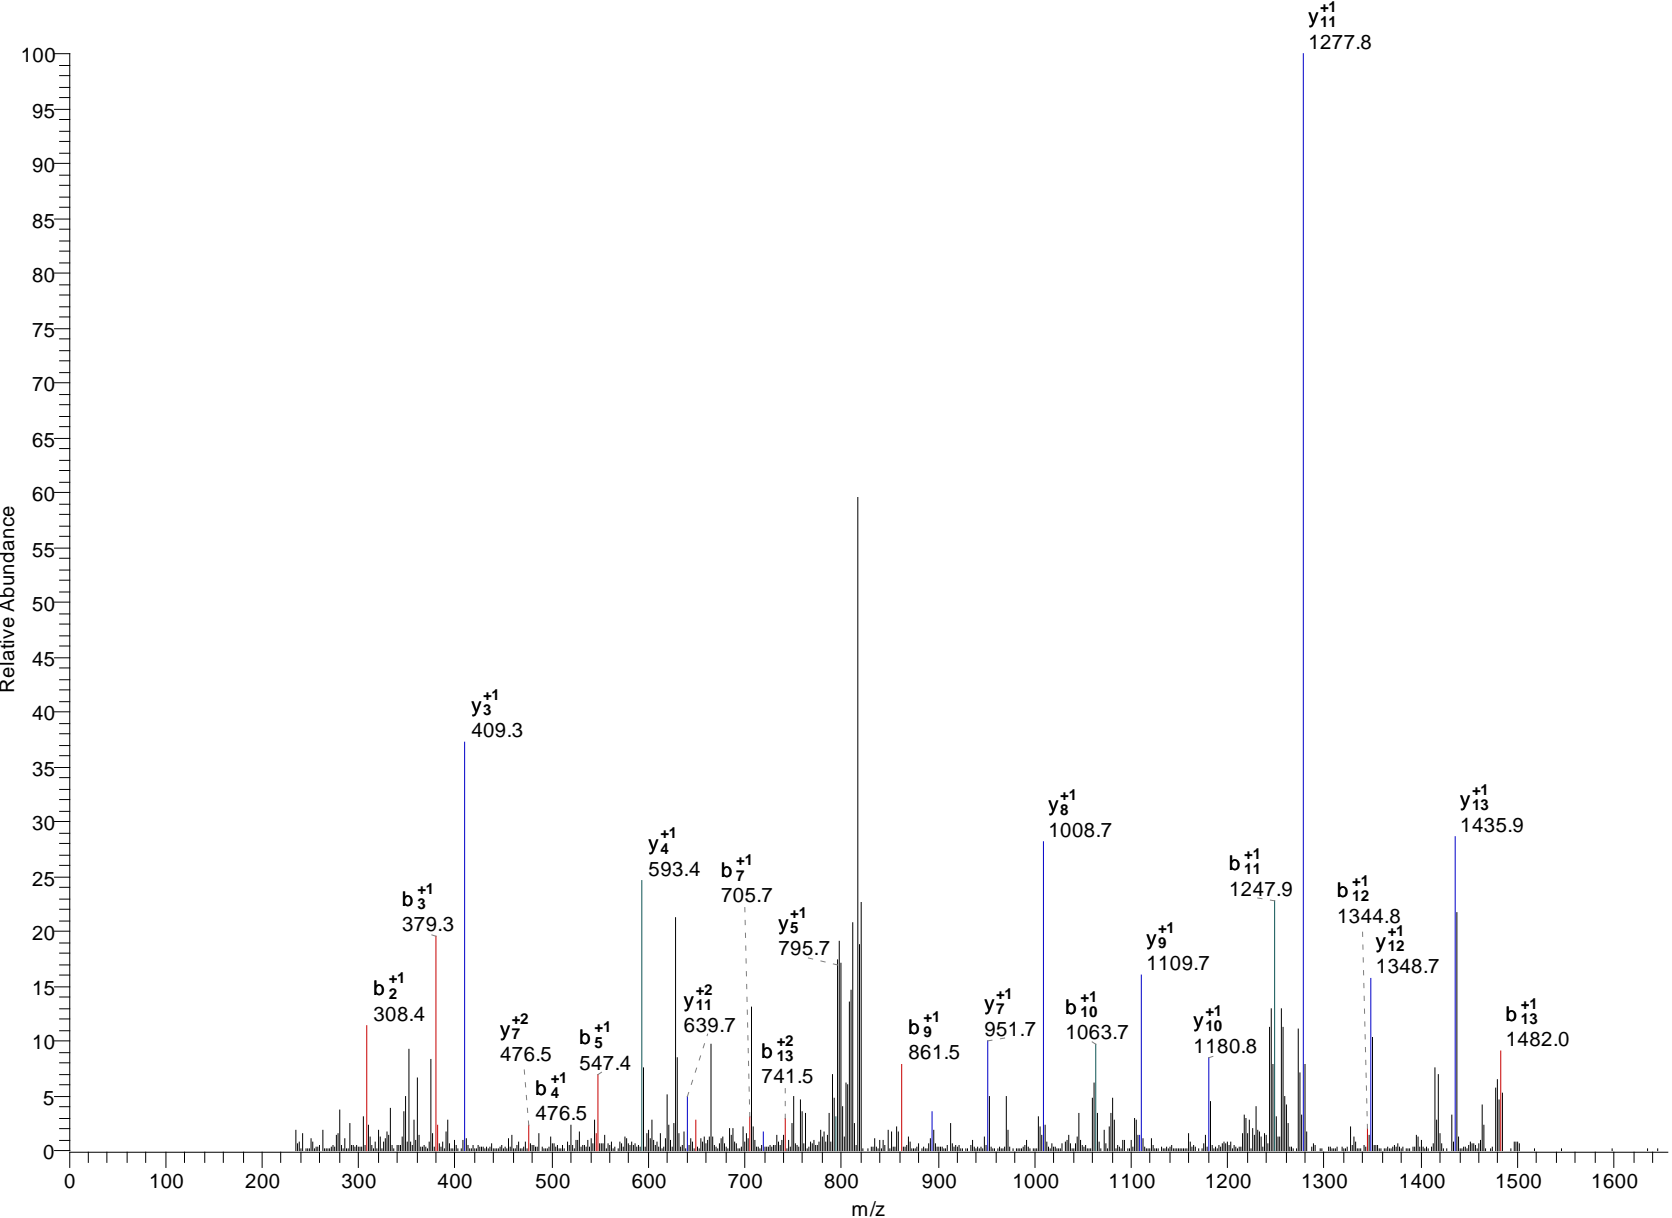

prKpr,me1:1SAPATGGVKme2:2KprPHR H3K27me1:1K36me2:2

#8614-8614 RT:58.94-58.94 NL: 9.96E2

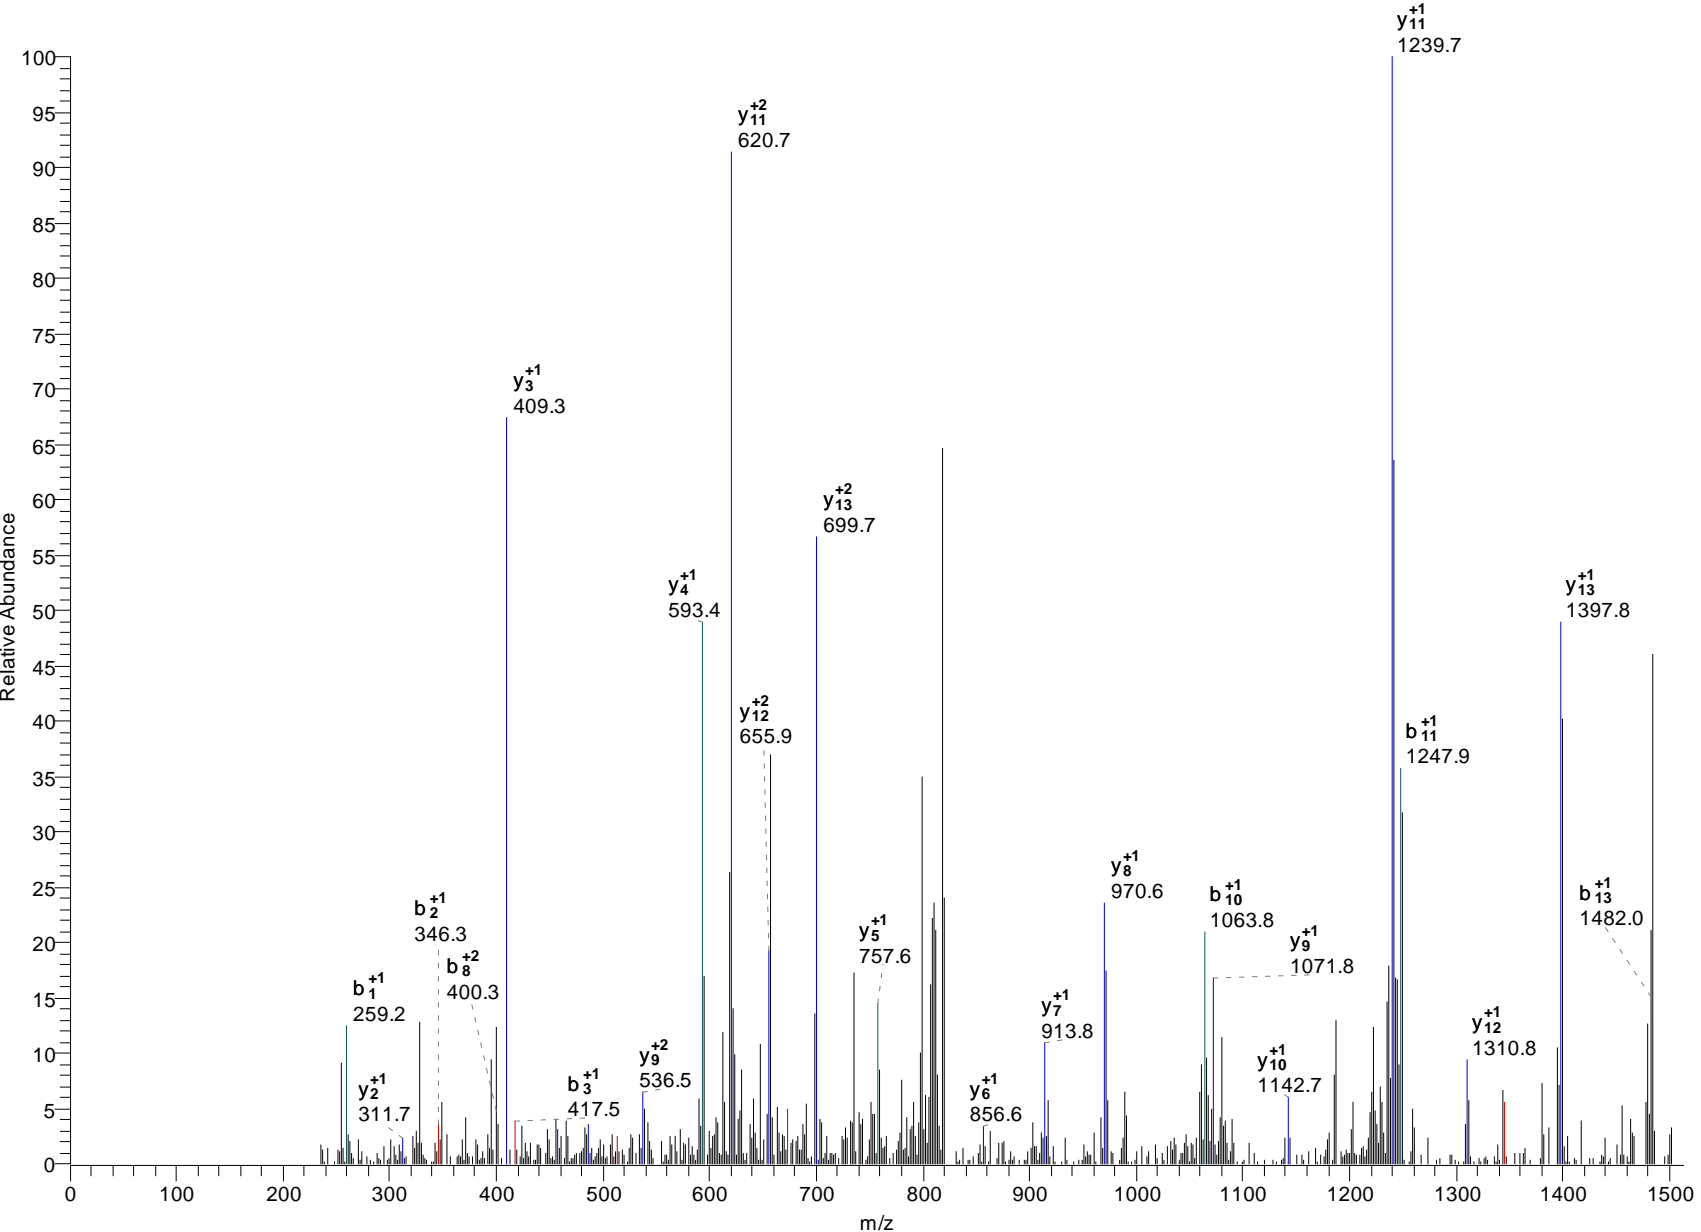

# prKme3:OSAPATGGVKpr,me1:1KprPHR

#8140-8140 RT:56.19-56.19 NL: 4.14E5

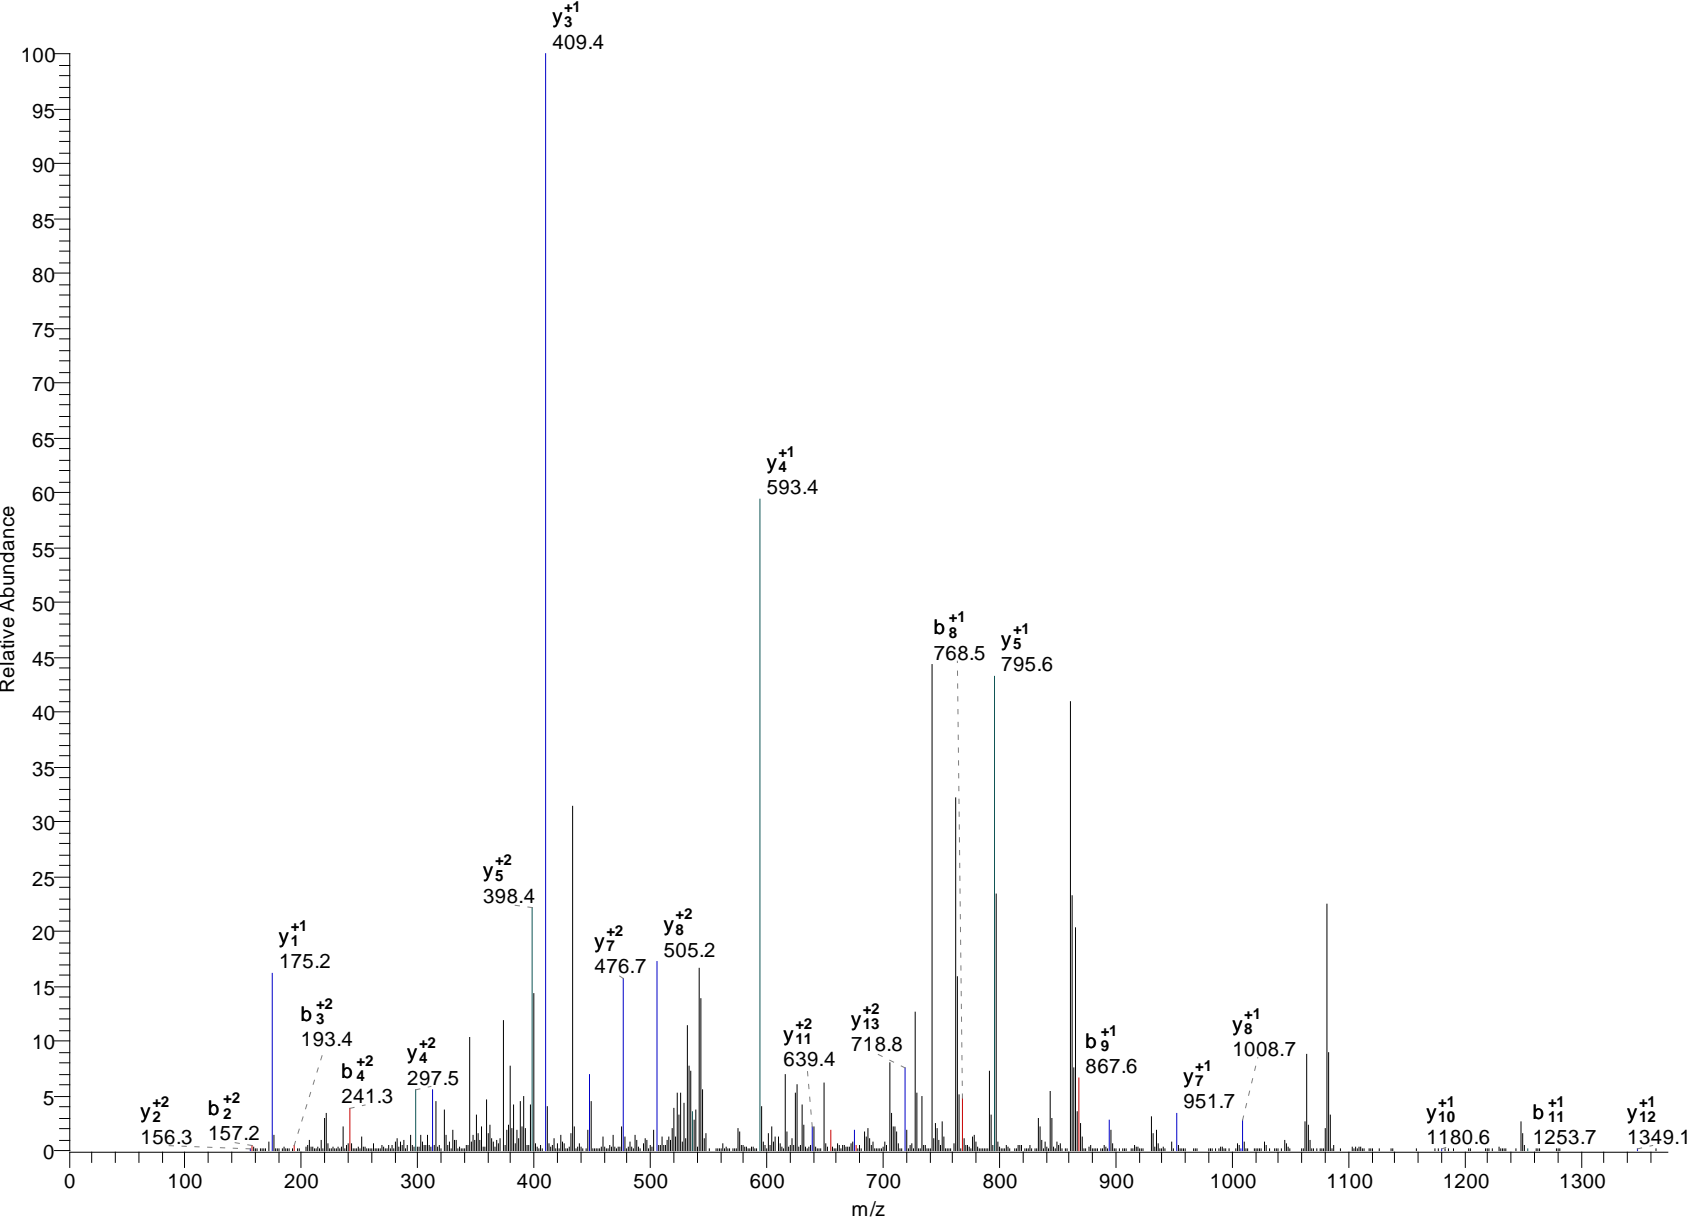

prKpr,me1:0SAPATGGVKme3:1KprPHR H3K27me1:0K36me3:1

#8495-8495 RT:58.12-58.12 NL: 4.54E5

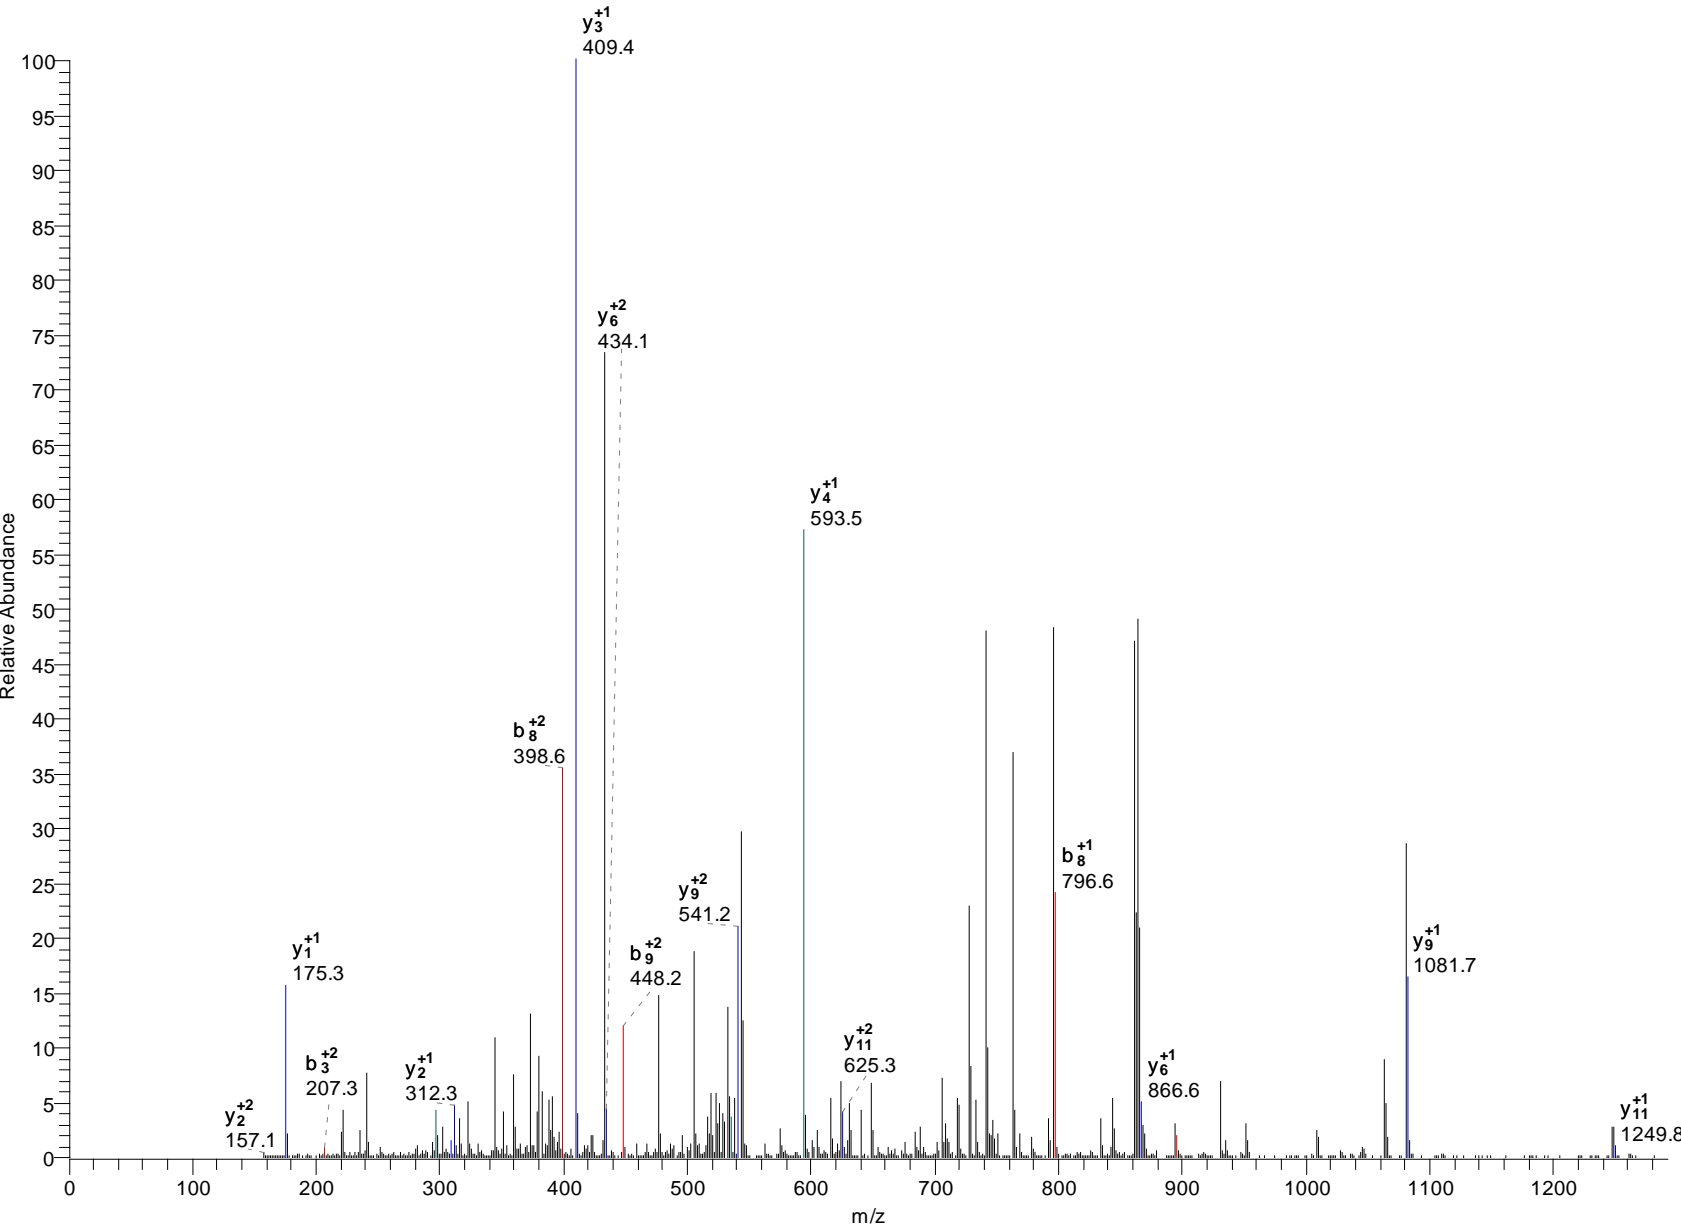



prKme3:1SAPATGGVKpr,me1:1KprPHR H3K27me3:1K36me1:1

#8141-8141 RT:56.20-56.20 NL: 6.42E4

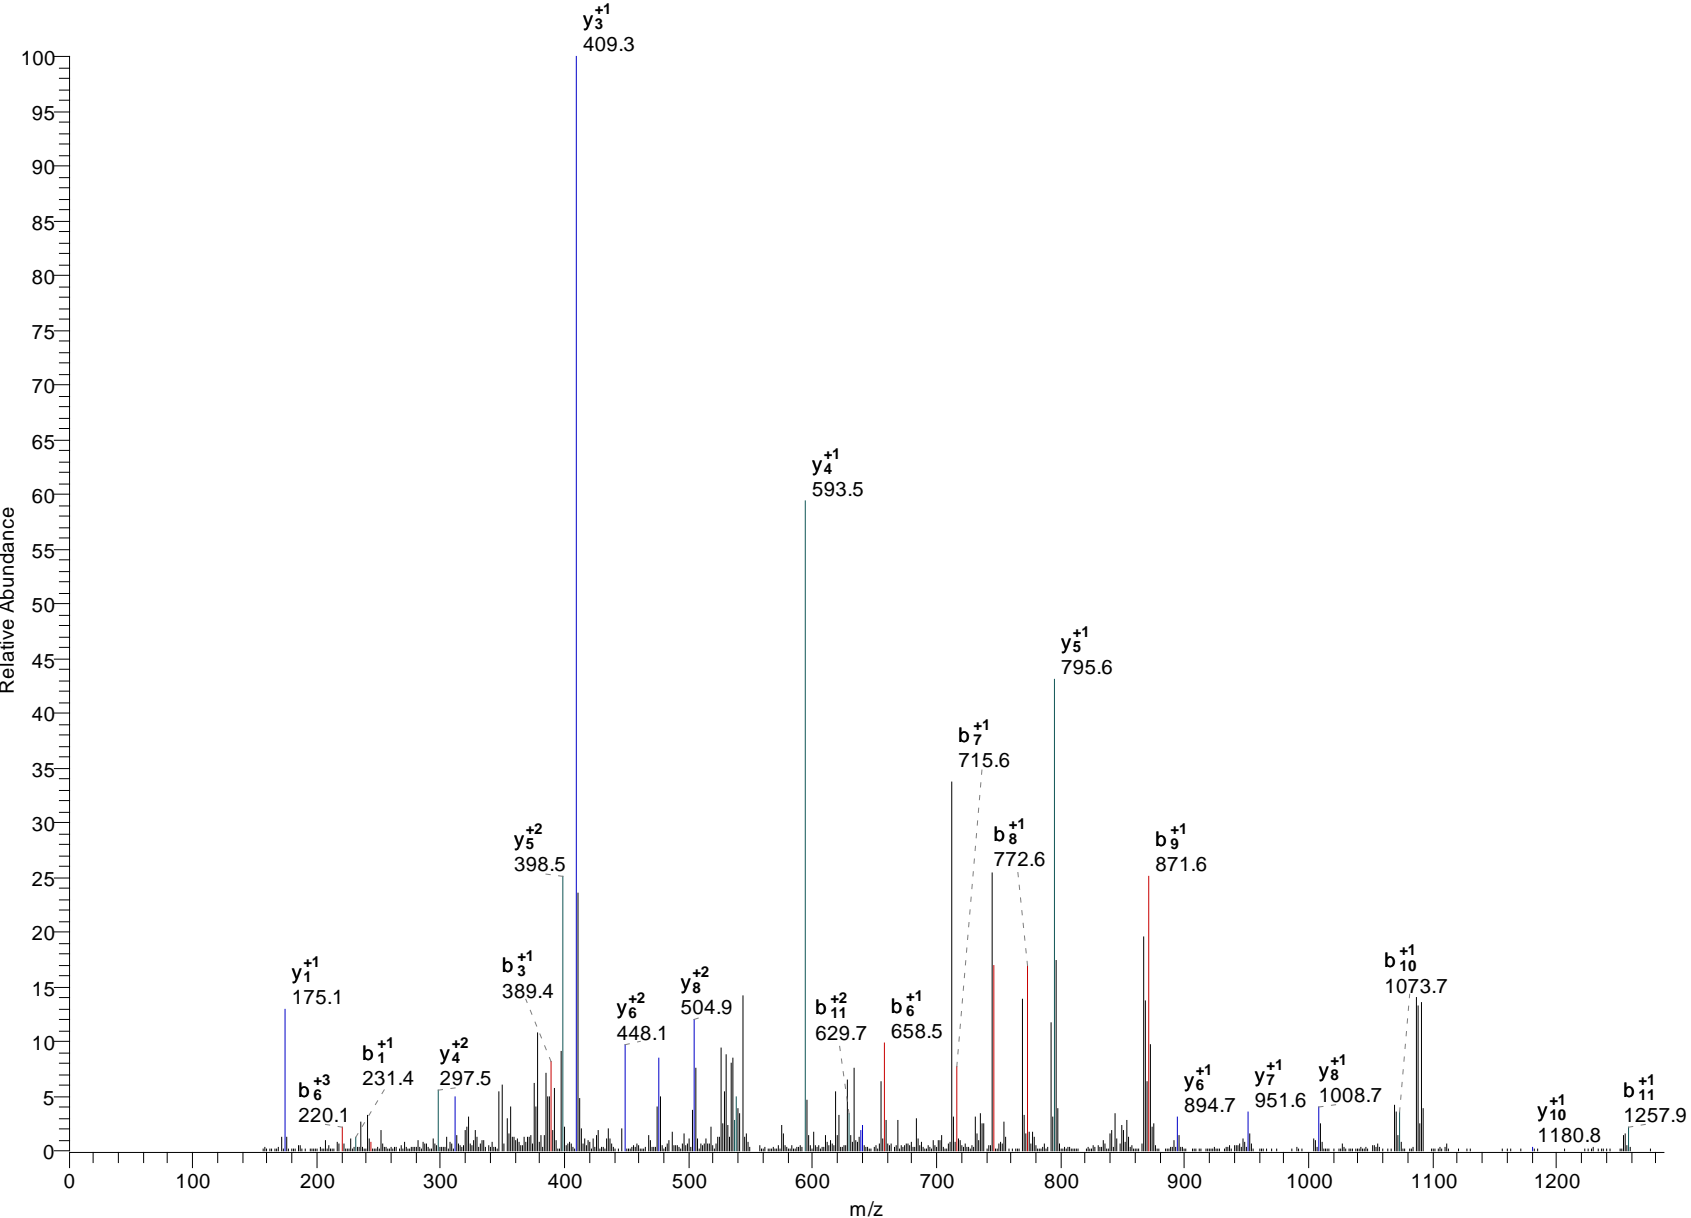

prKpr,me1:1SAPATGGVKme3:1KprPHR H3K27me1:1K36me3:1

#8475-8475 RT:58.01-58.01 NL: 3.70E4

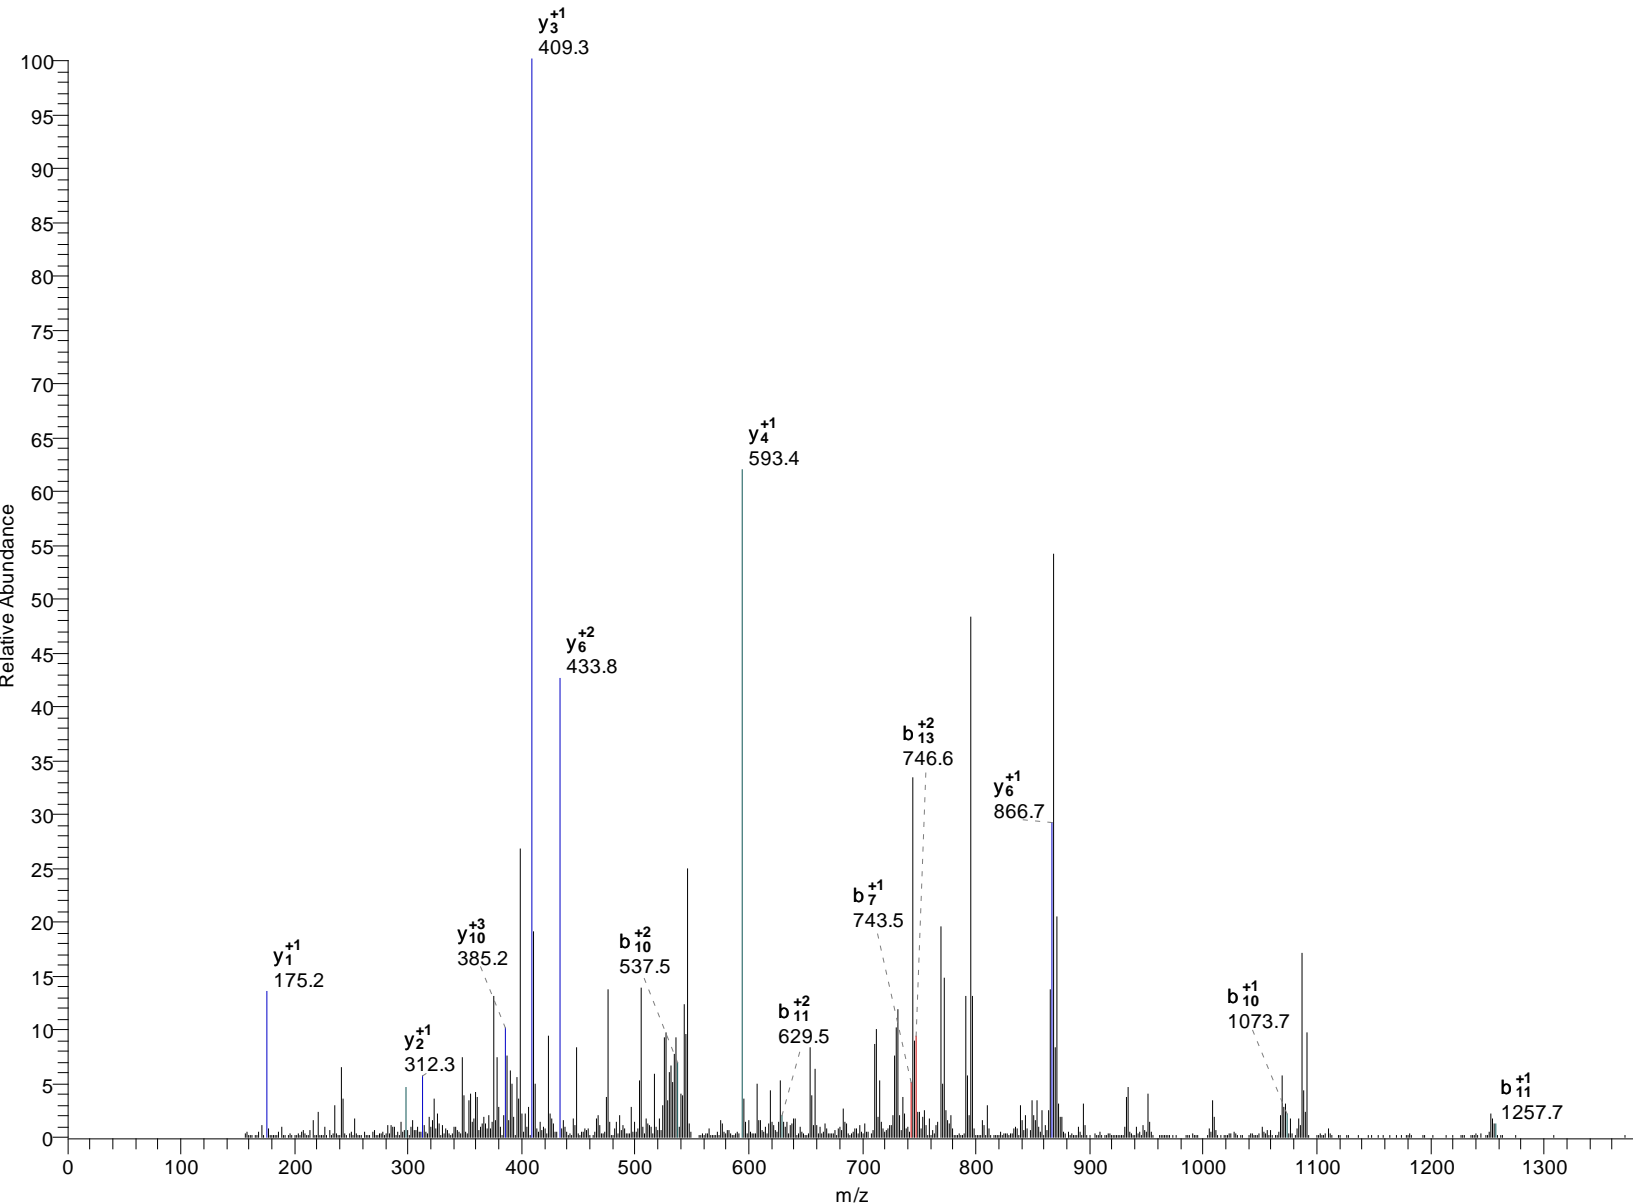

prKme3:3SAPATGGVKpr,me1:0KprPHR H3K27me3:3K36me1:0

#7849-7849 RT:56.01-56.01 NL: 4.26E3

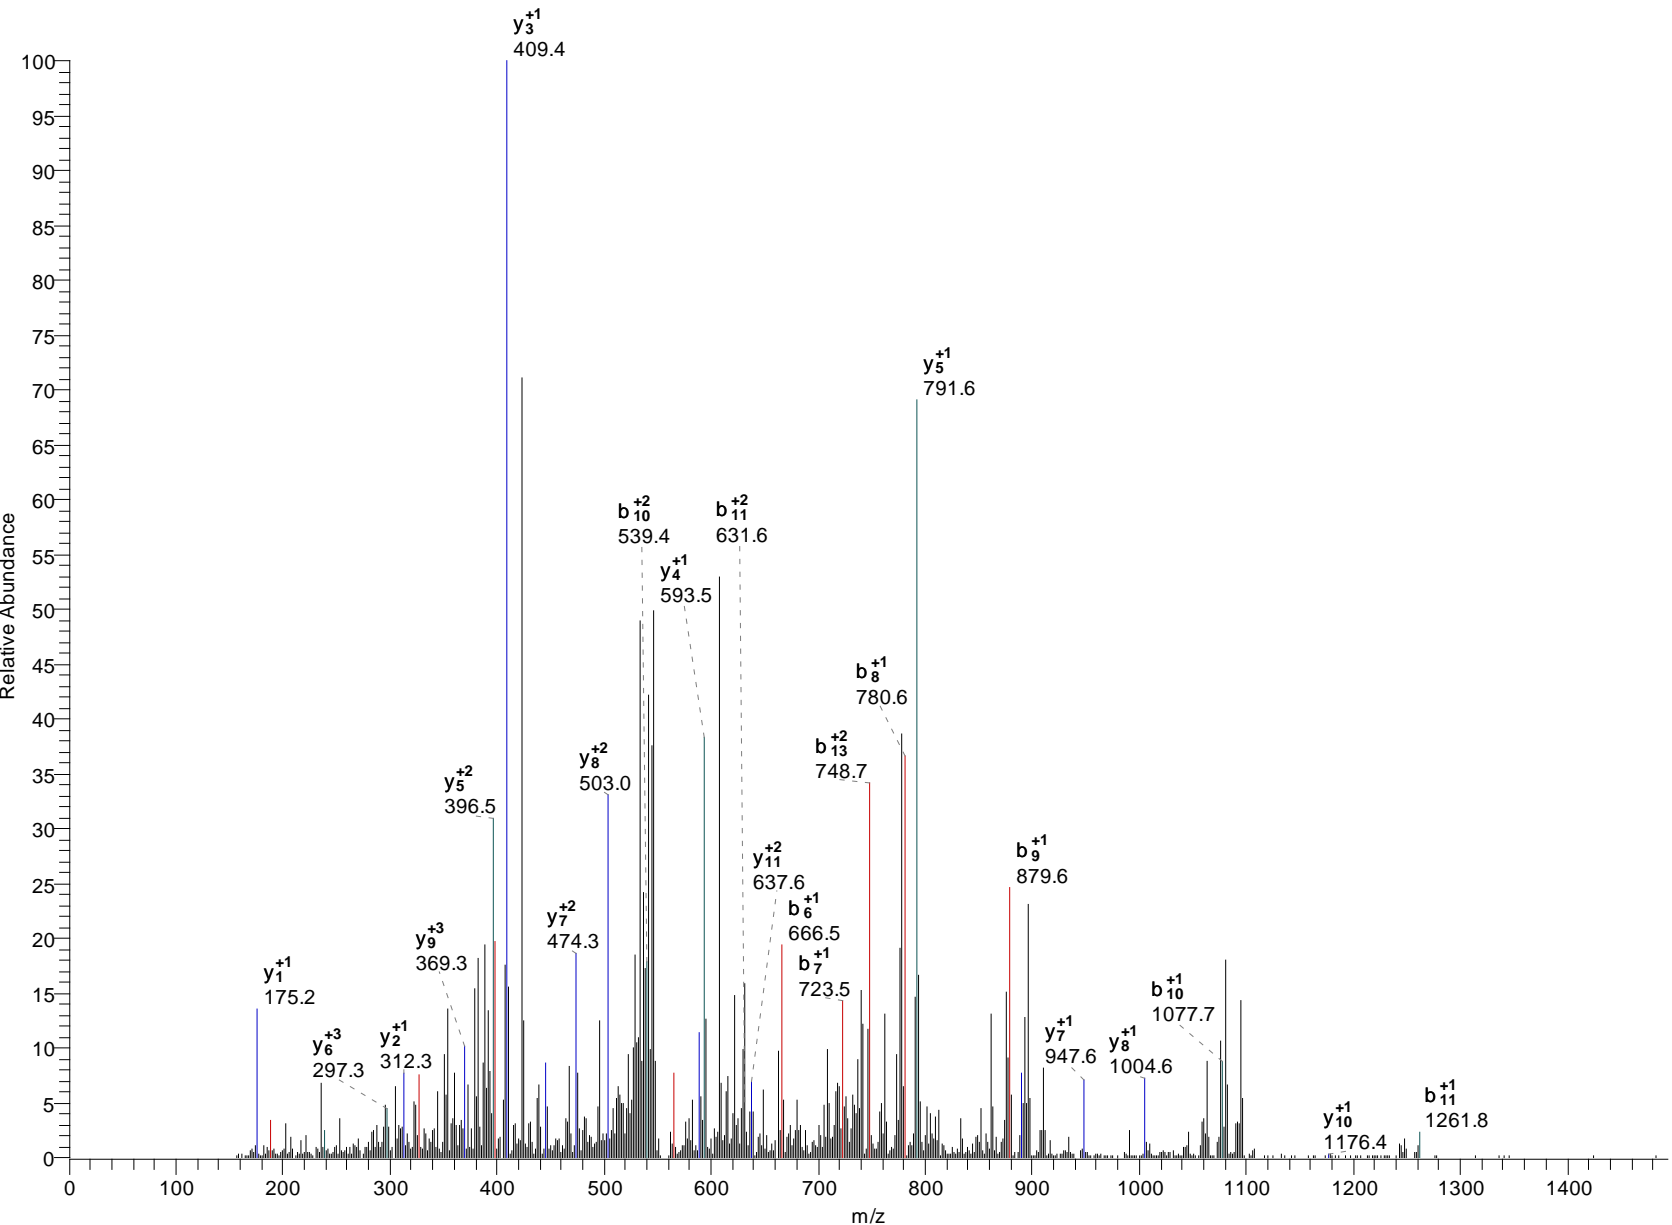

prKpr,me1:0SAPATGGVKme3:3KprPHR H3K27me1:0K36me3:3

#8849-8849 RT:60.34-60.34 NL: 7.26E2

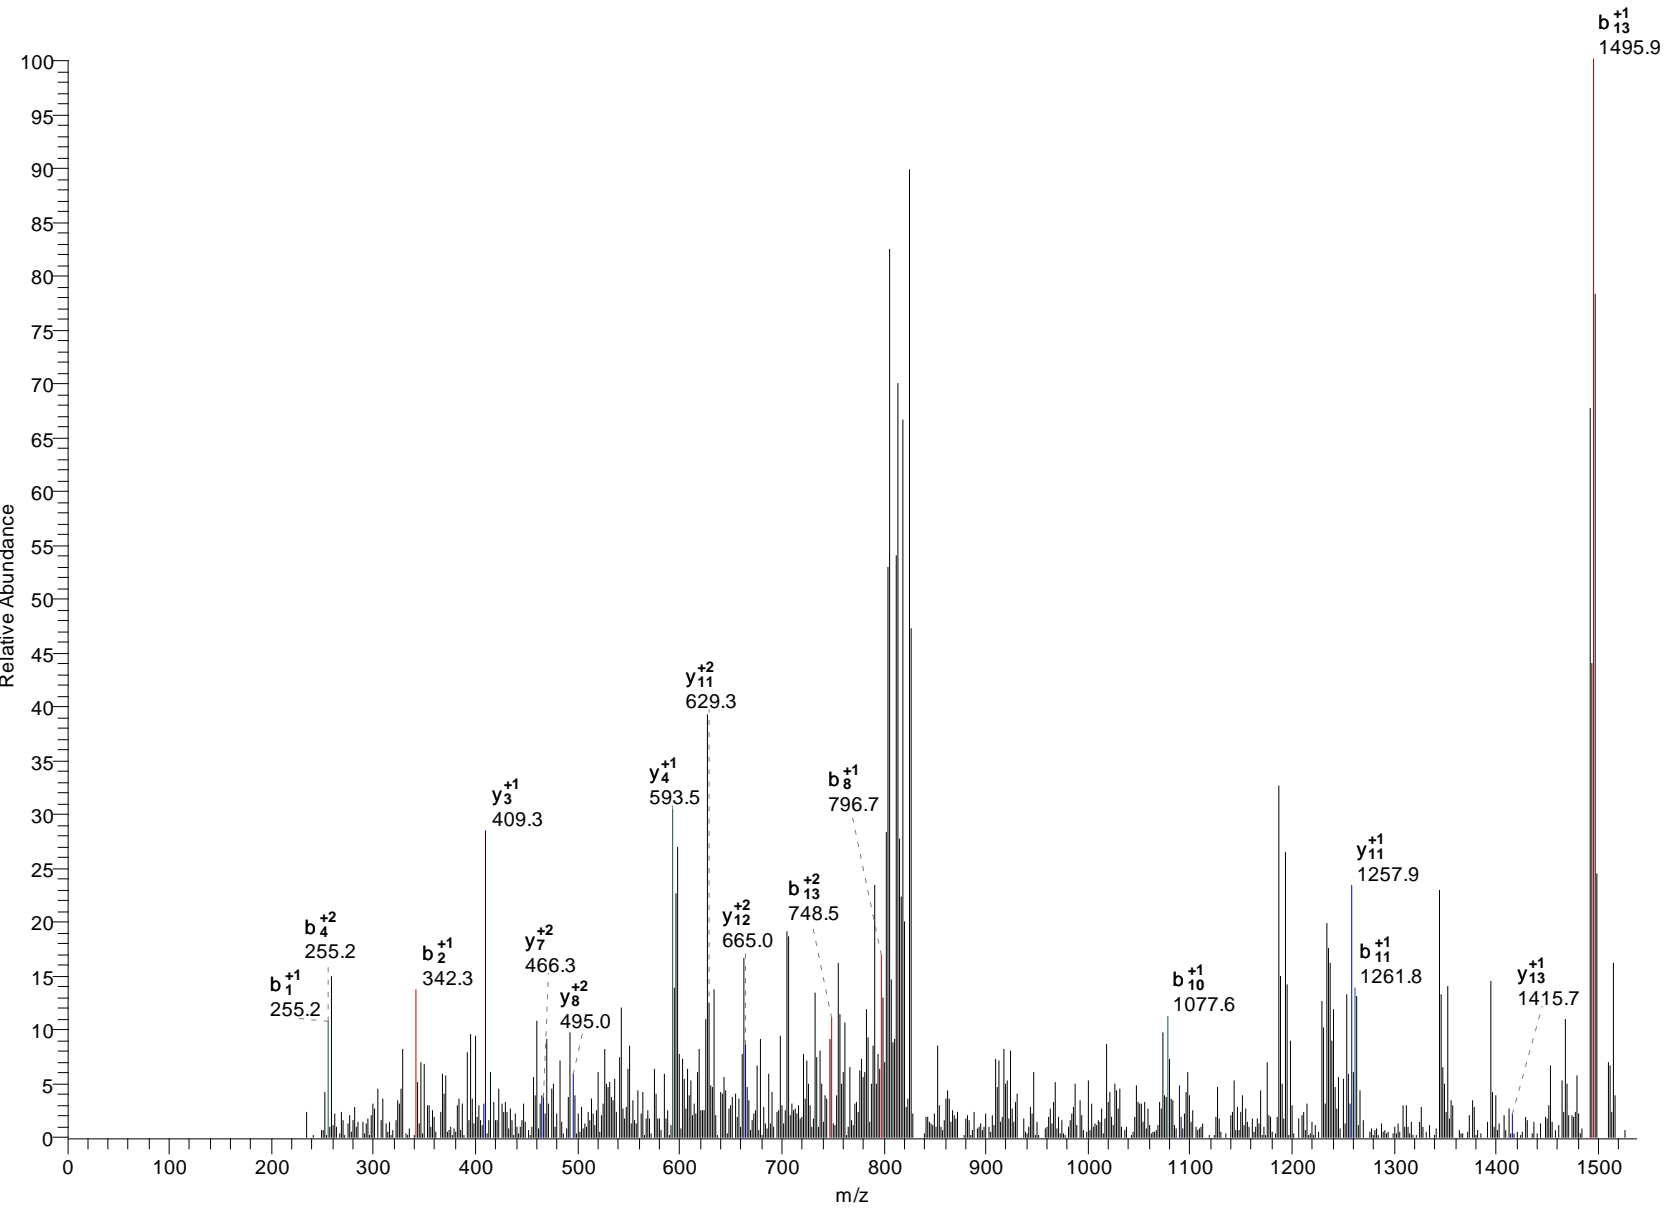

prKme3:3SAPATGGVKpr,me1:1KprPHR H3K27me3:3K36me1:1

#8392-8392 RT:59.27-59.27 NL: 1.93E3

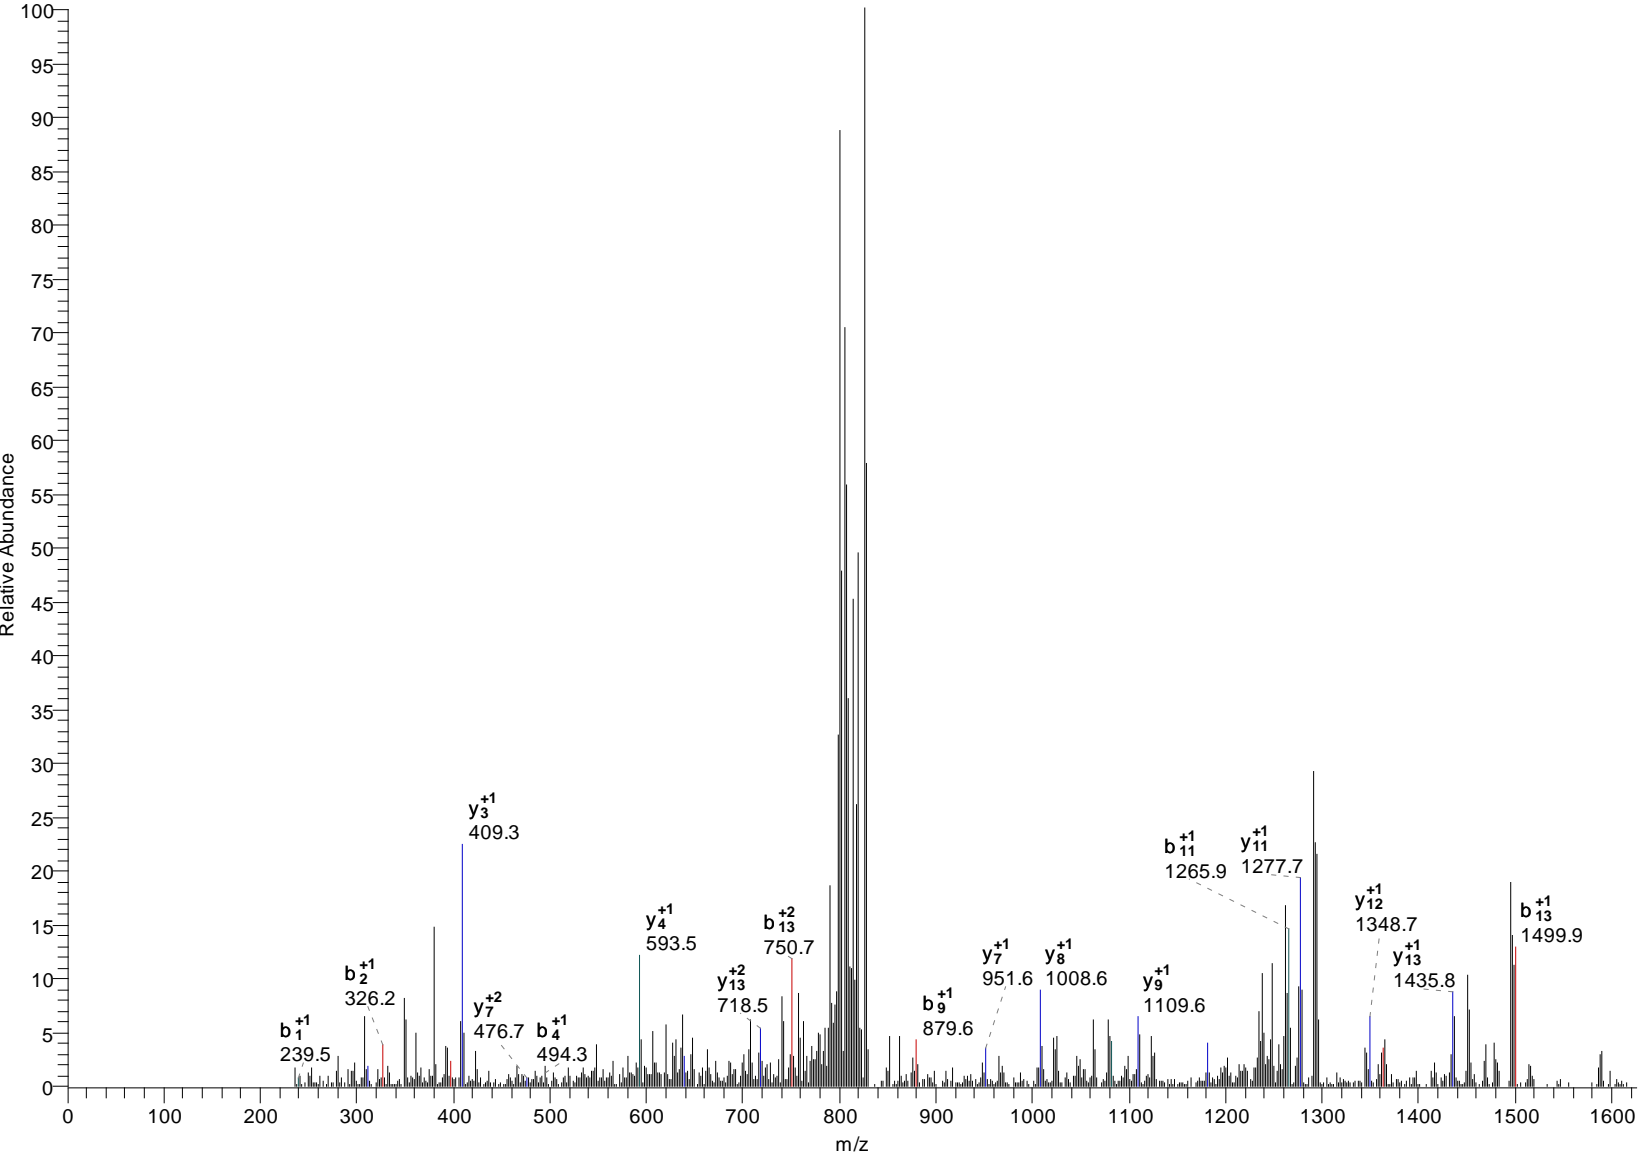

prKpr,me1:1SAPATGGVKme3:3KprPHR H3K27me1:1K36me3:3

#8766-8766 RT:59.85-59.85 NL: 2.84E5

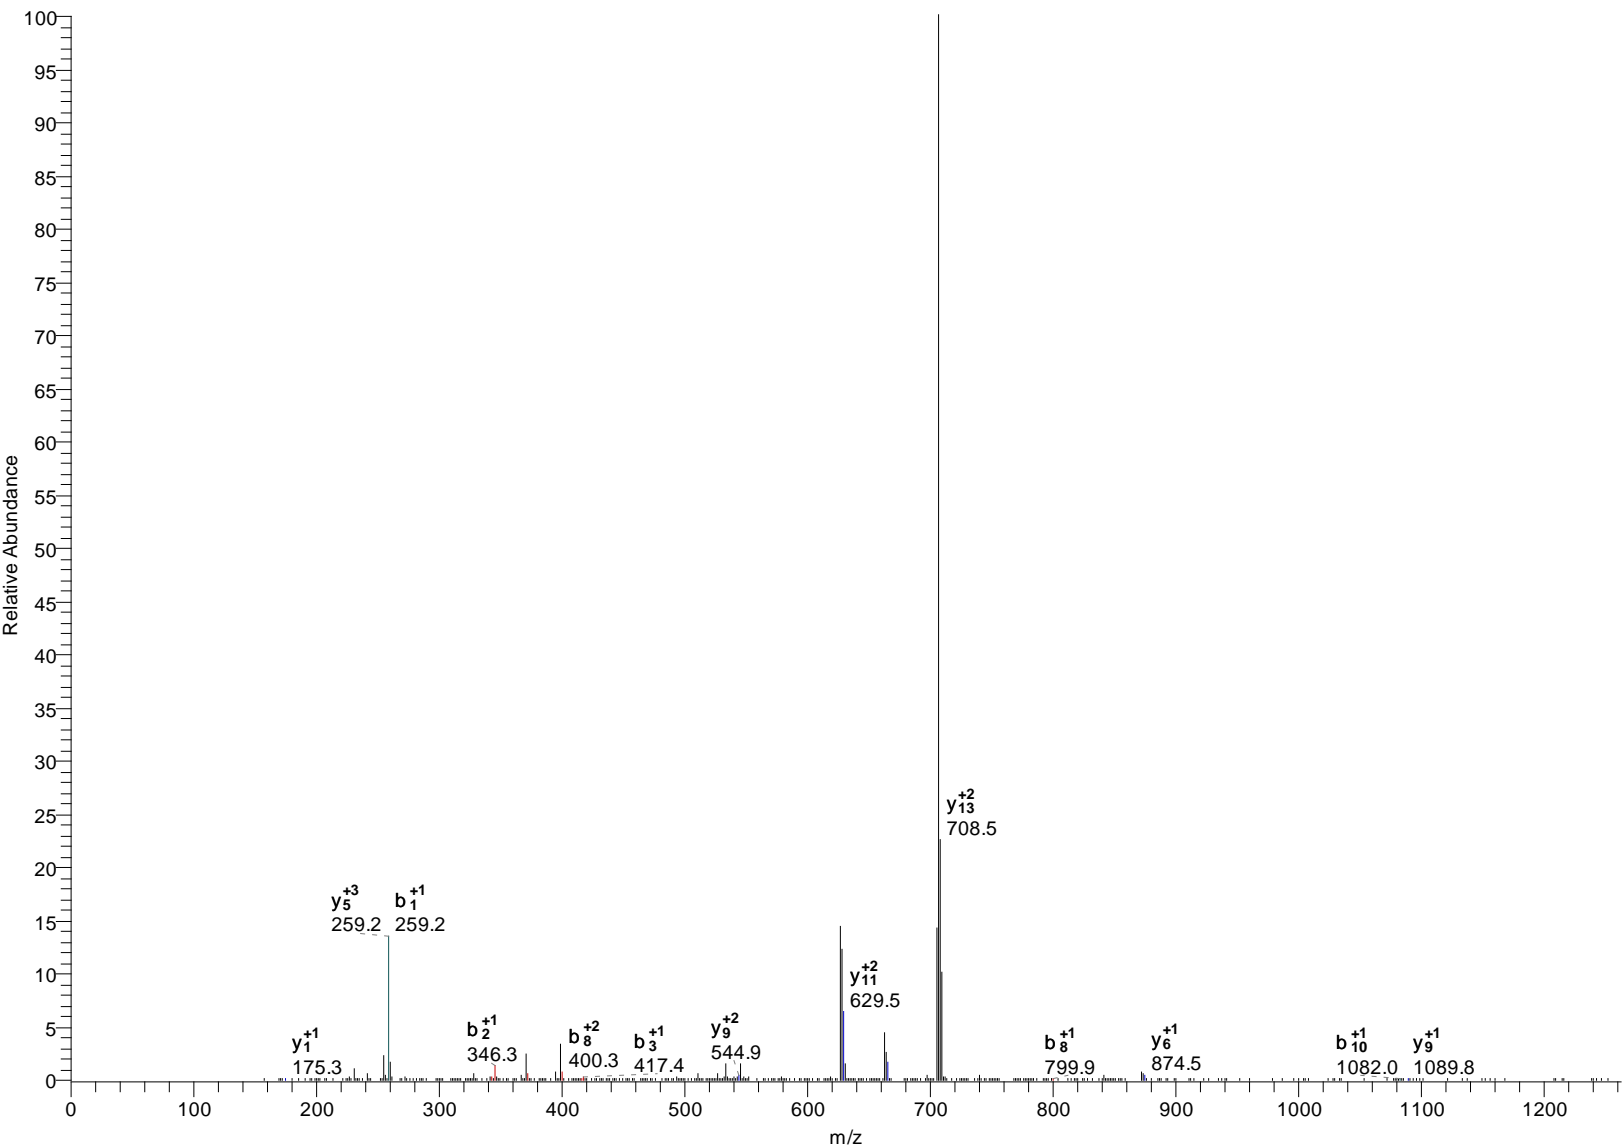

prKme2:0SAPATGGVKme2:1KprPHR

H3K27me2:0K36me2:1

#6163-6163 RT:49.33-49.33 NL: 5.18E3

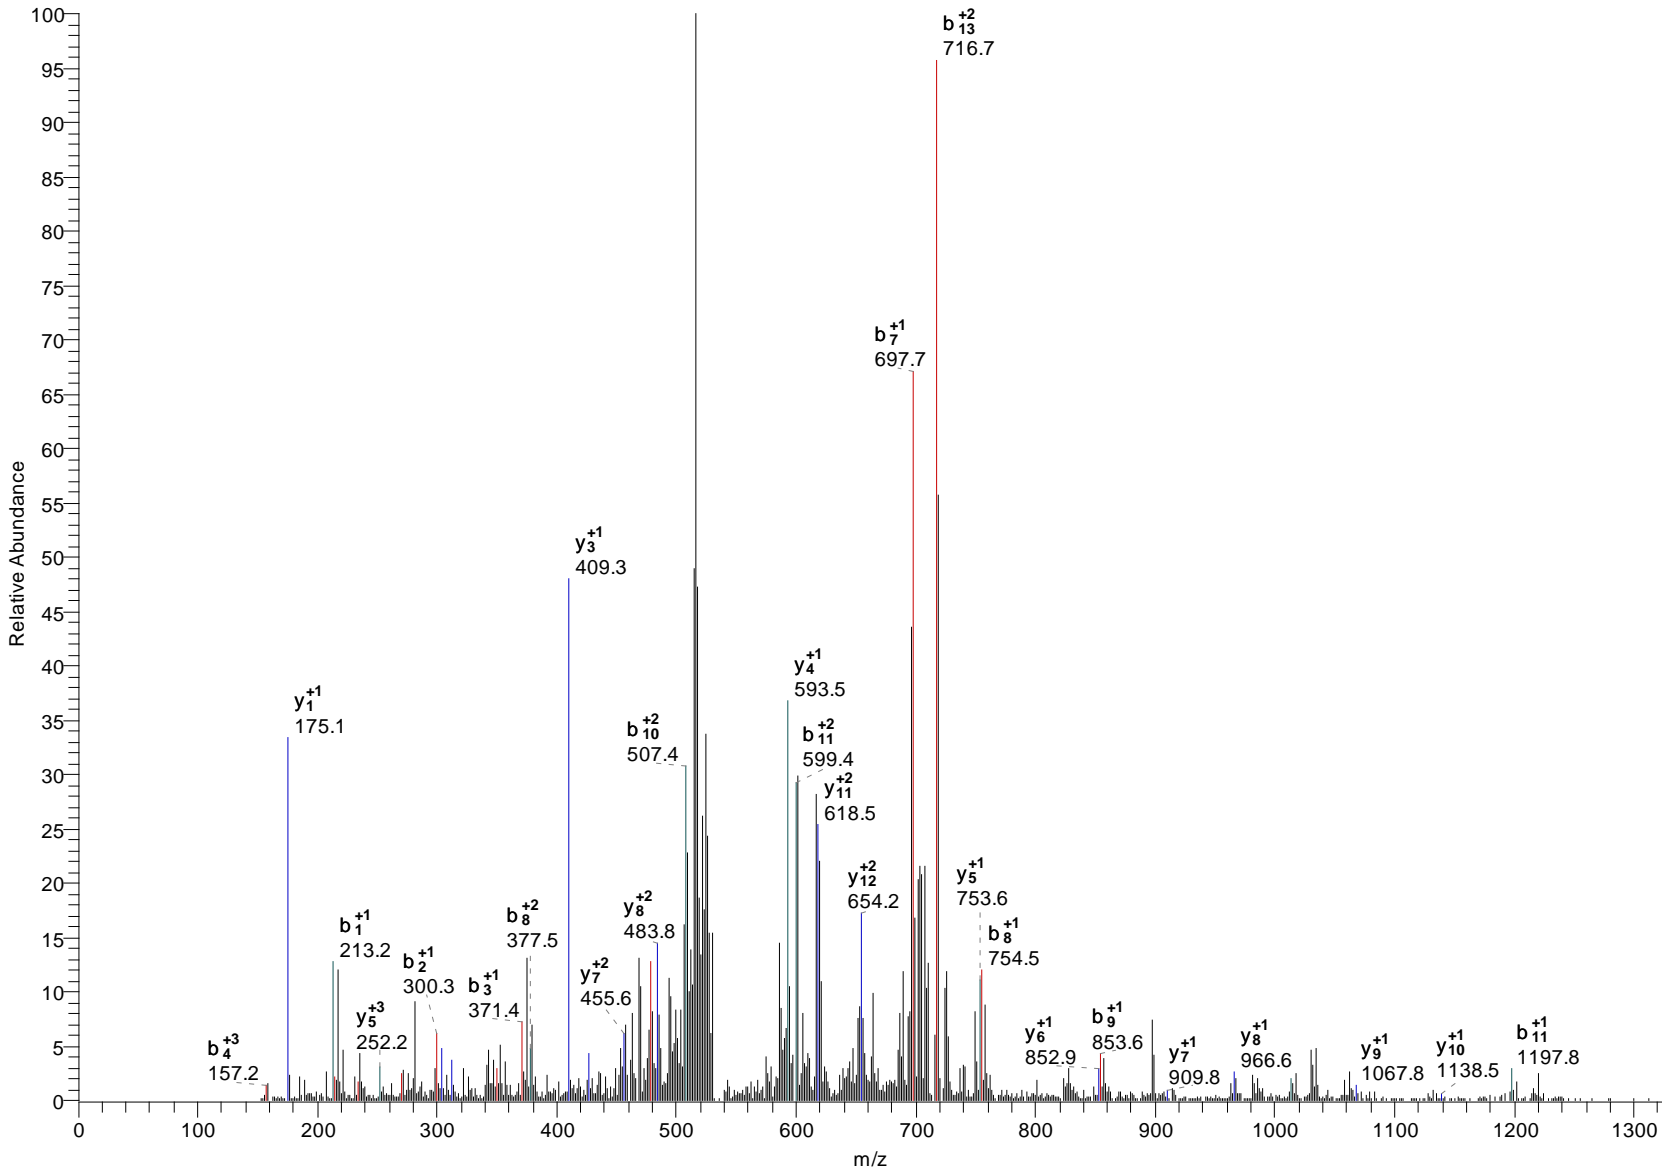

prKpr,me2:1SAPATGGVKpr,me2:1KprPHR

H3K27me2:1K36me2:1

#6696-6696 RT:47.70-47.70 NL: 1.20E4

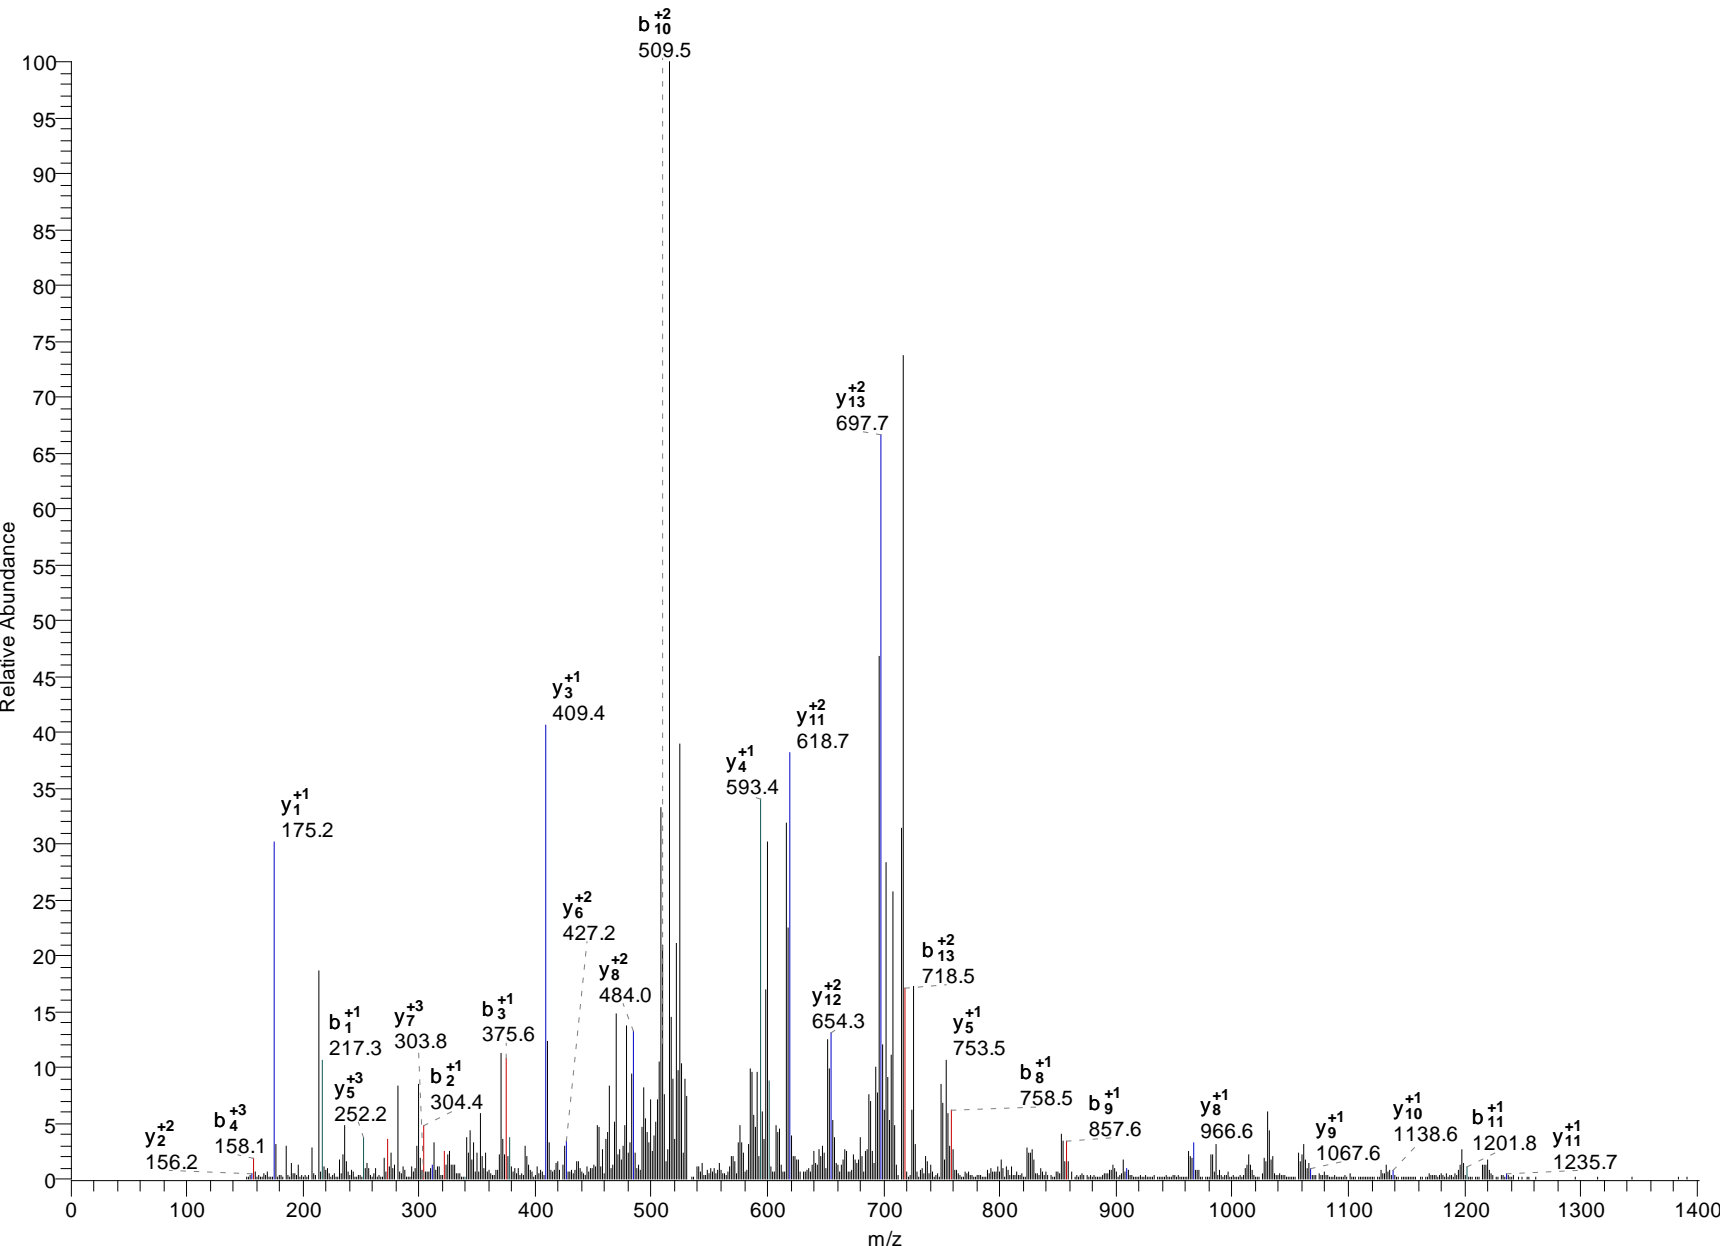



prKpr,me2:1SAPATGGVKpr,me2:2KprPHR

H3K27me2:1K36me2:2

#6700-6700 RT:47.72-47.72 NL: 5.32E3

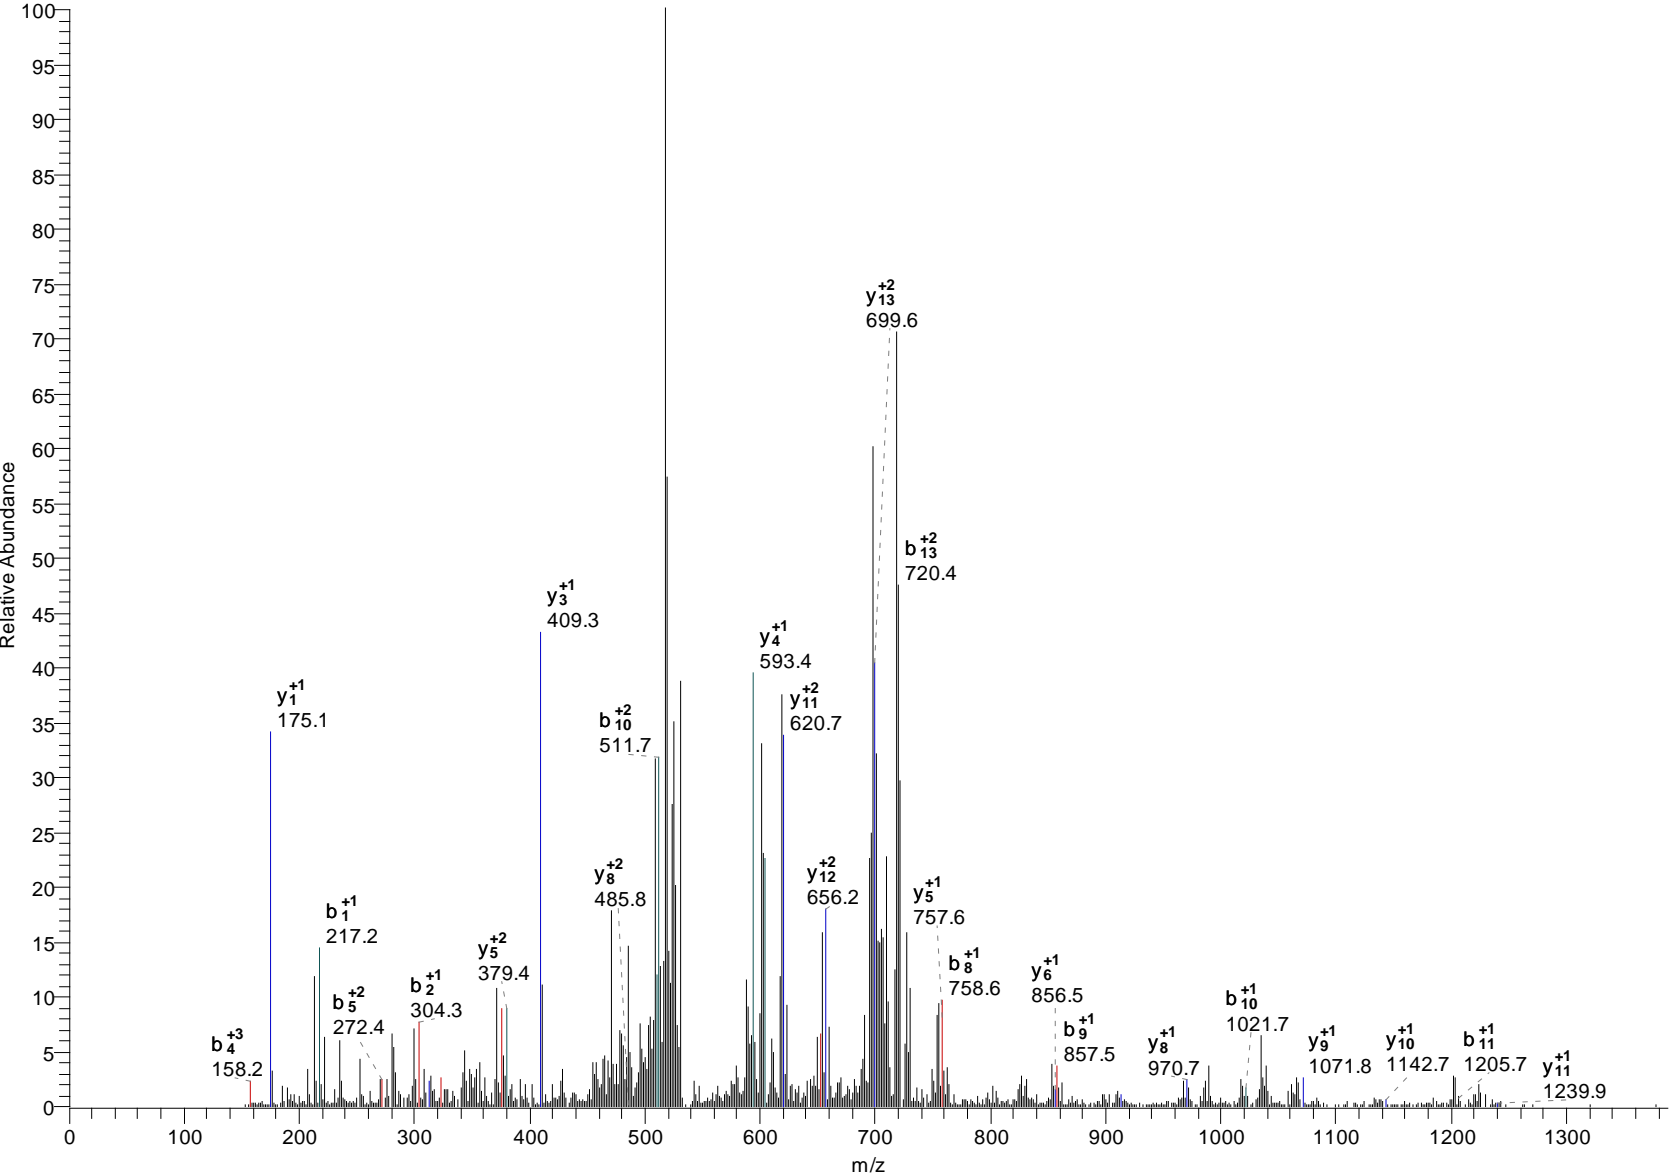

prKpr,me2:2SAPATGGVKpr,me2:2KprPHR

H3K27me2:2K36me2:2

#7226-7226 RT:50.74-50.74 NL: 1.36E3

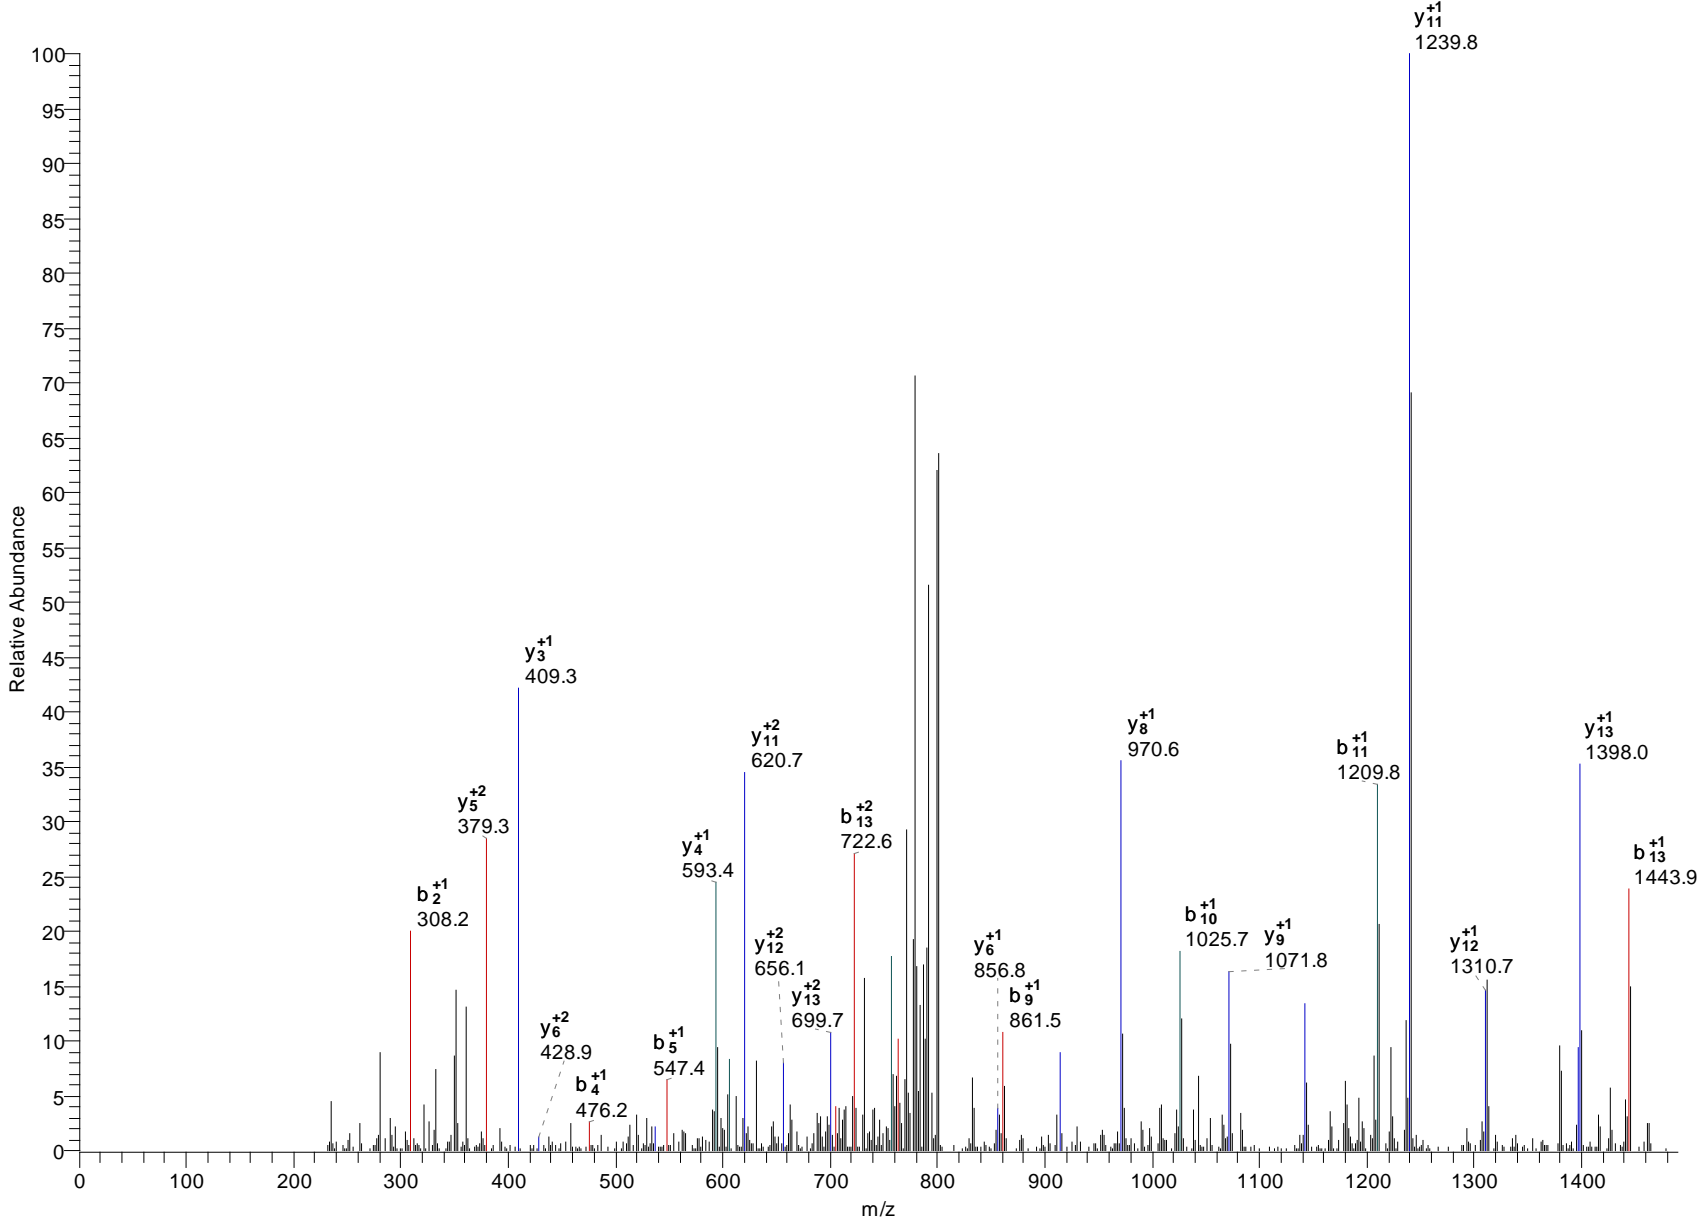

prKme3:OSAPATGGVKme2:1KprPHR

H3K27me3:0K36me2:1

#5992-5992 RT:55.40-55.40 NL: 9.66E3

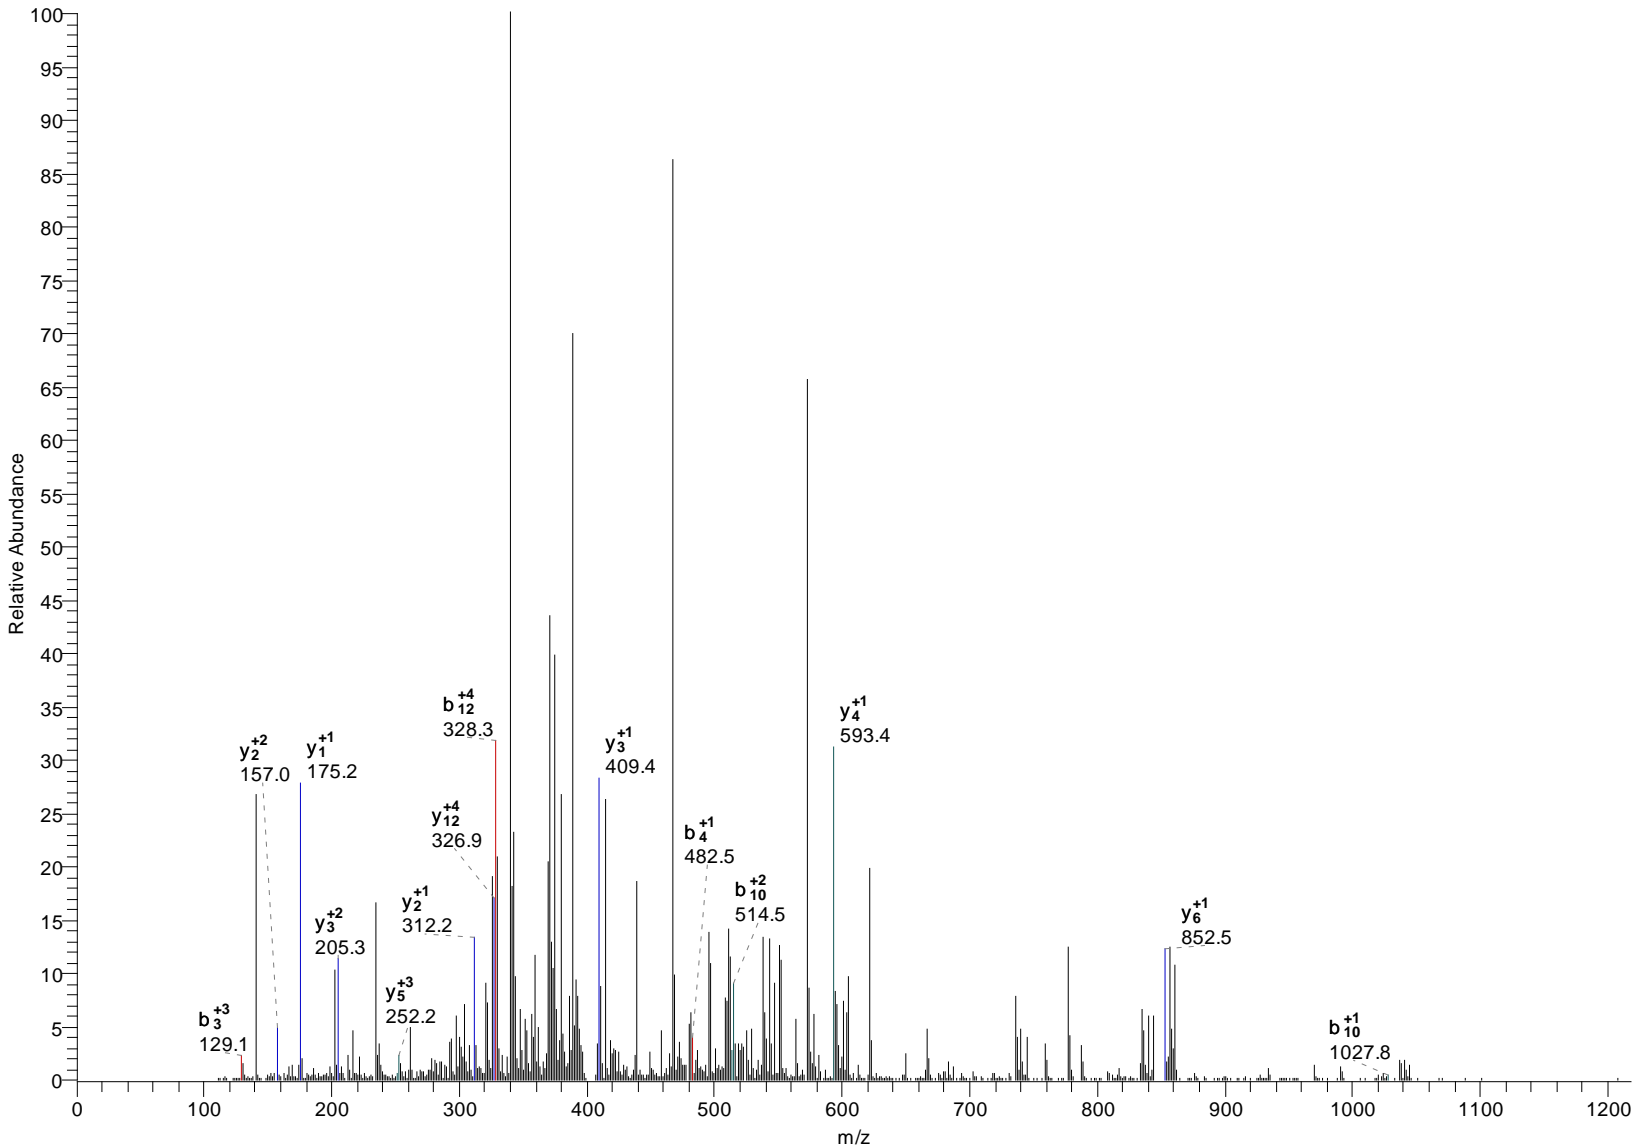

prKme3:0SAPATGGVKme2:2KprPHR

H3K27me3:0K36me2:2

#6486-6486 RT:48.29-48.29 NL: 1.82E5

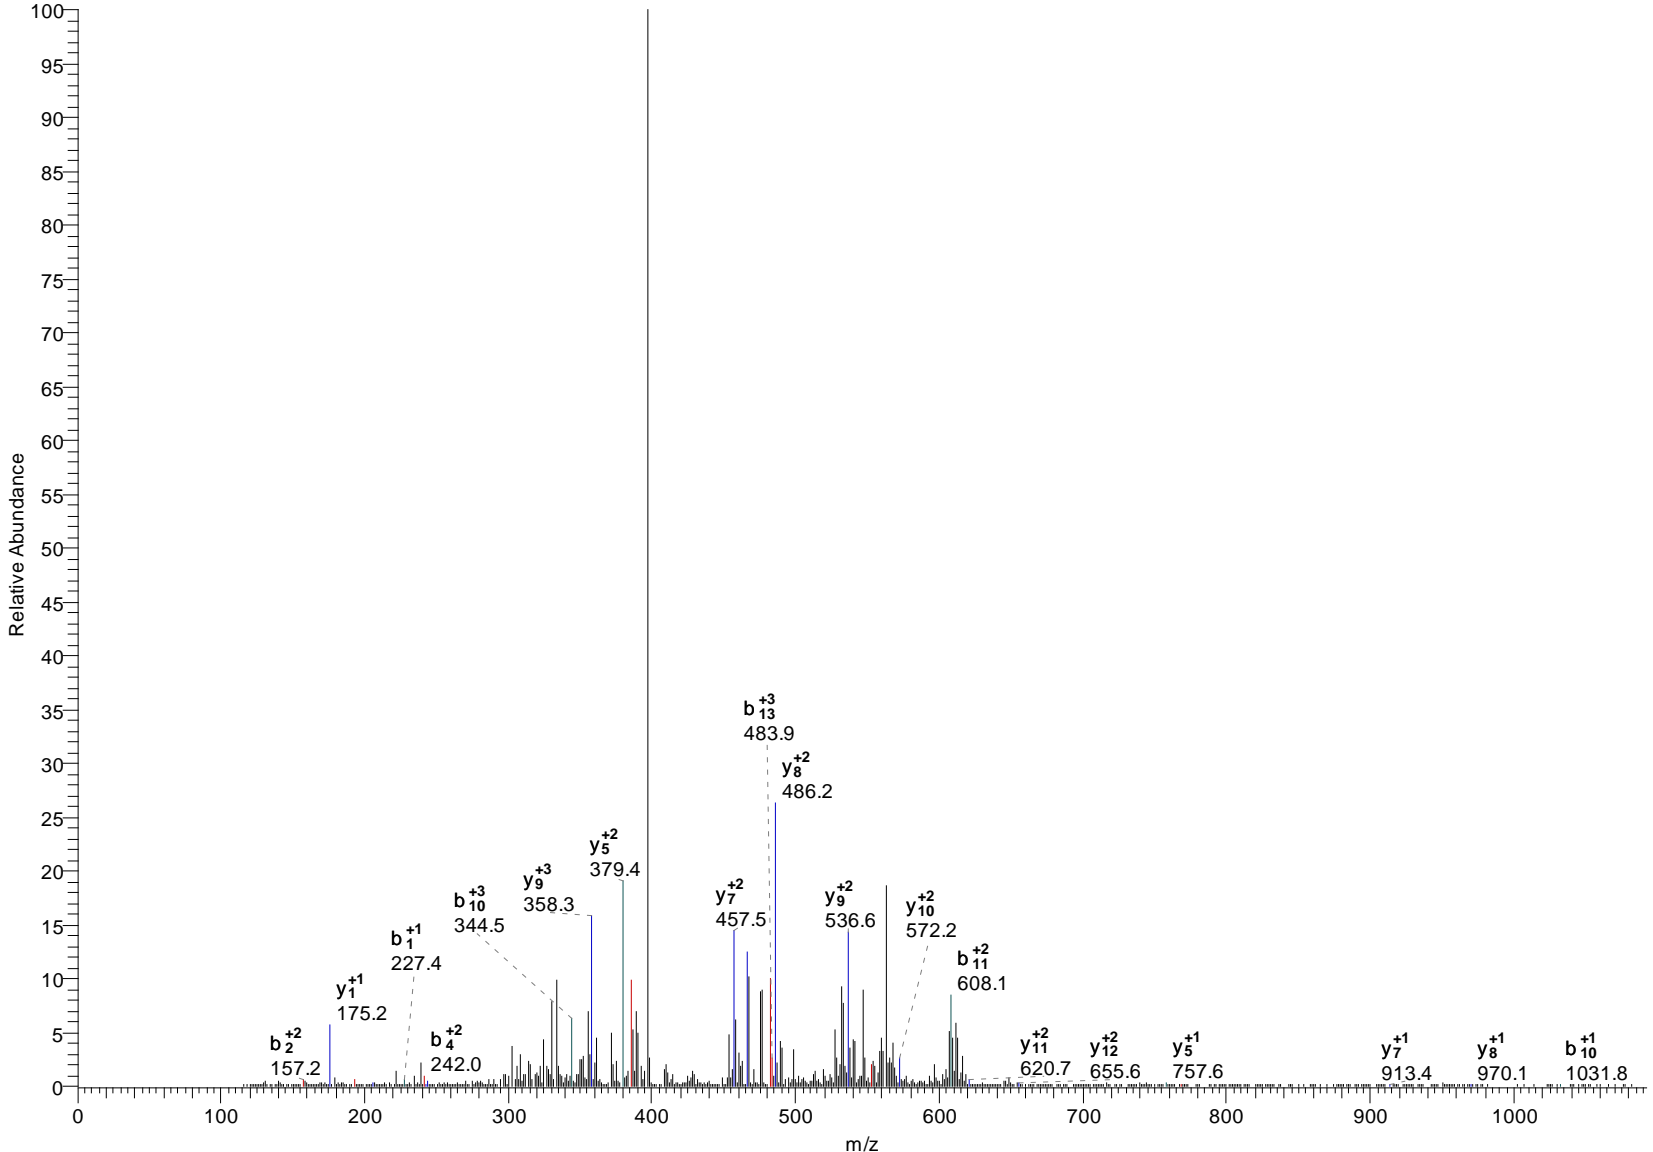

prKme3:1SAPATGGVKme2:2KprPHR

H3K27me3:1K36me2:2

#6496-6496 RT:48.35-48.35 NL: 4.18E4

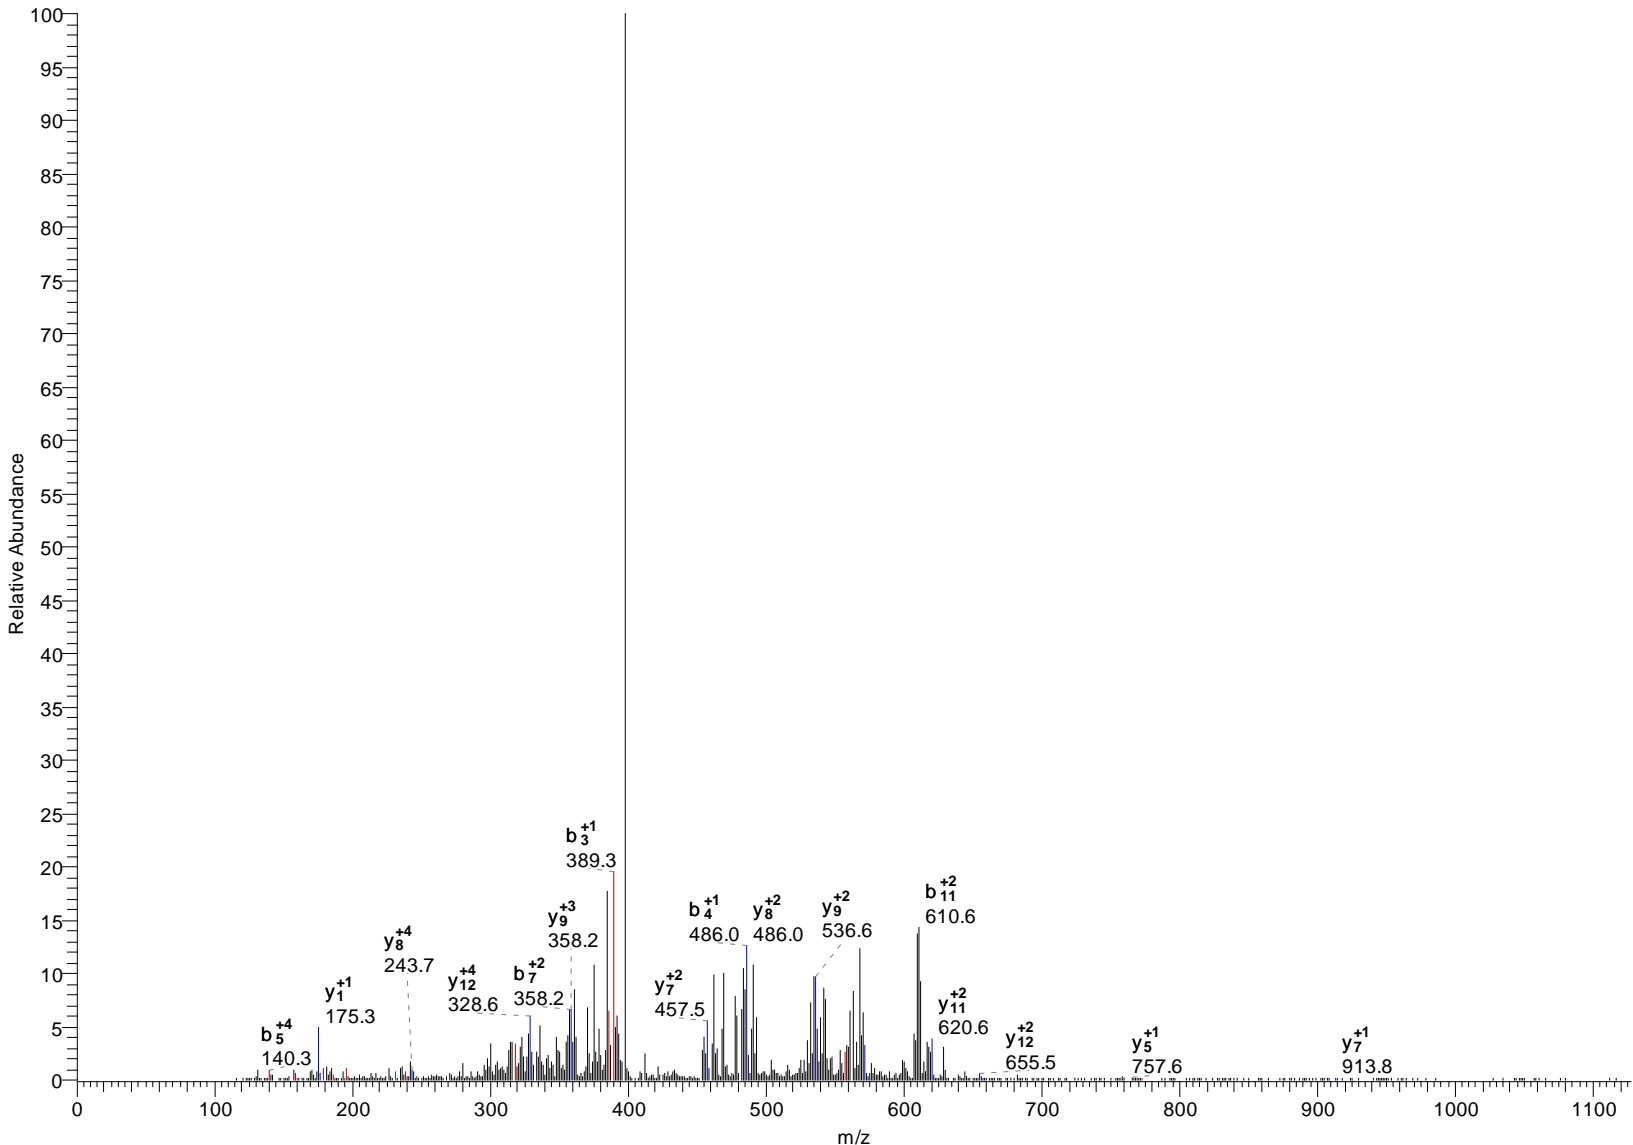

prKme3:2SAPATGGVKme2:2KprPHR

H3K27me3:2K36me2:2

#6904-6904 RT:49.05-49.05 NL: 4.54E3

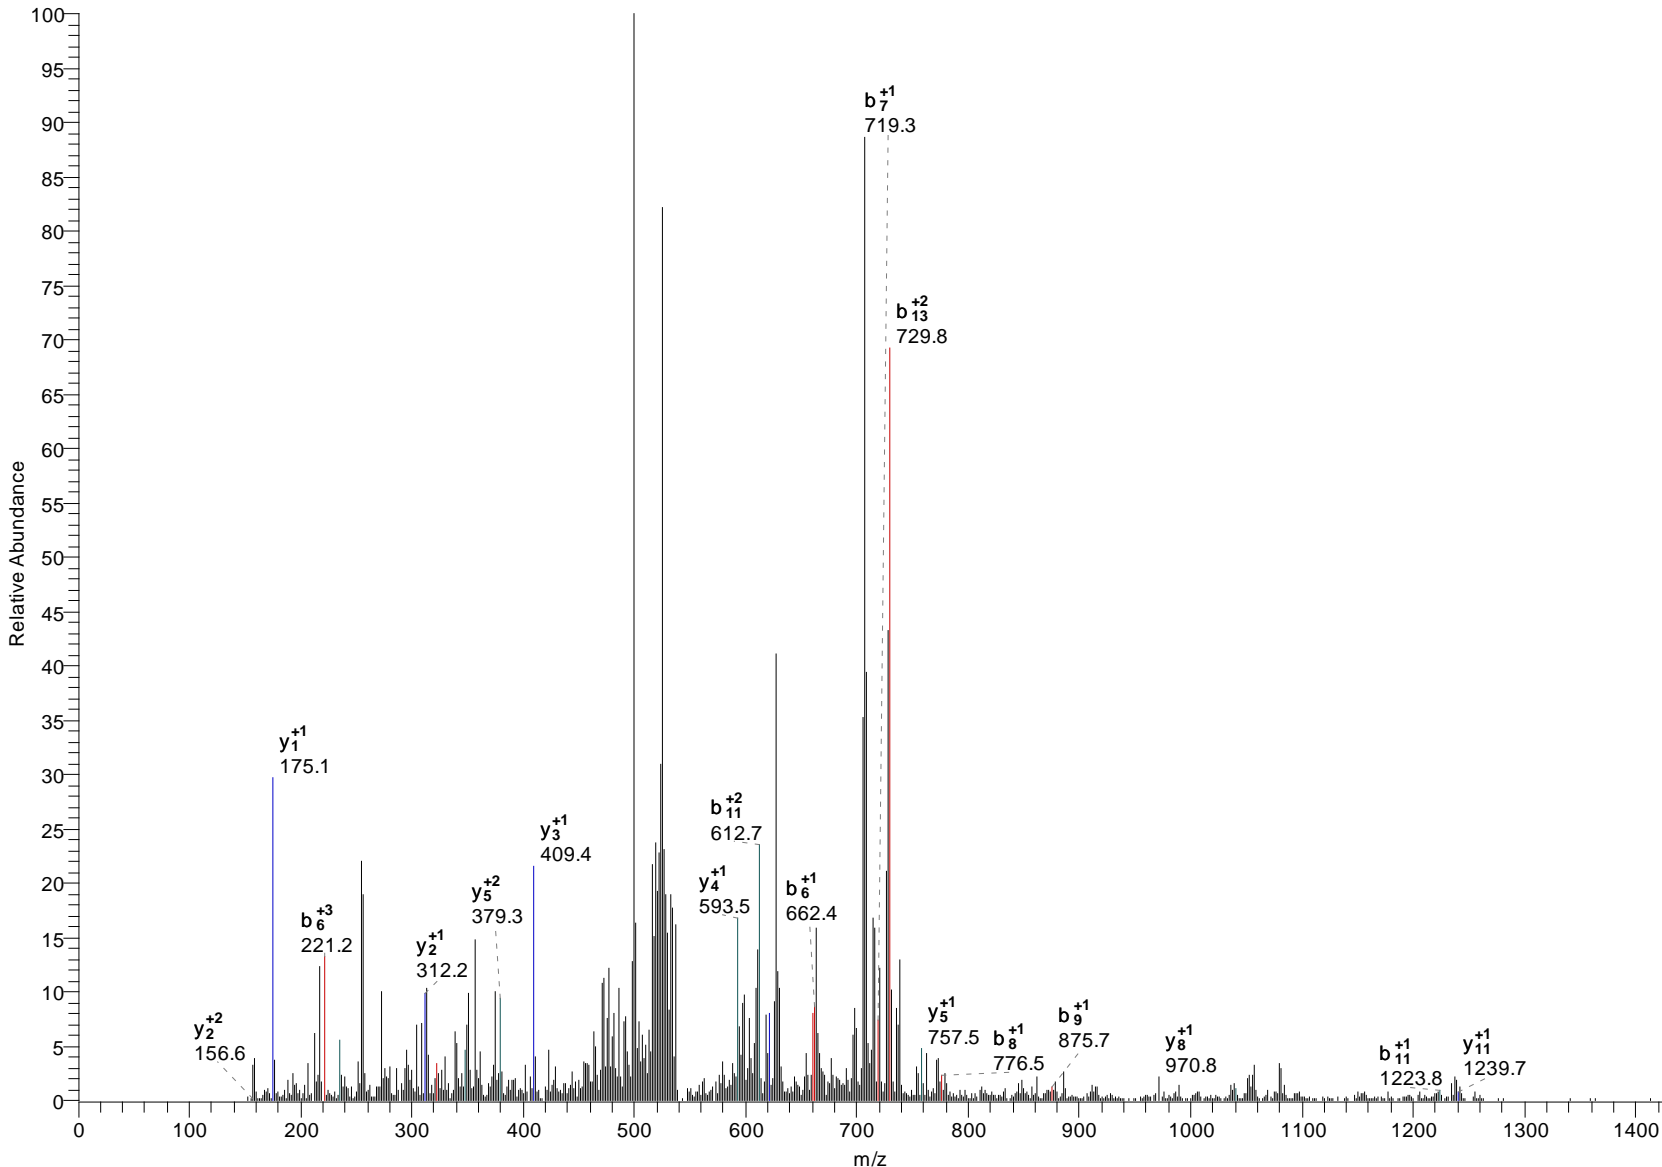

prKme3:3SAPATGGVKme2:2KprPHR

H3K27me3:3K36me2:2

#6923-6923 RT:49.16-49.16 NL: 5.59E4

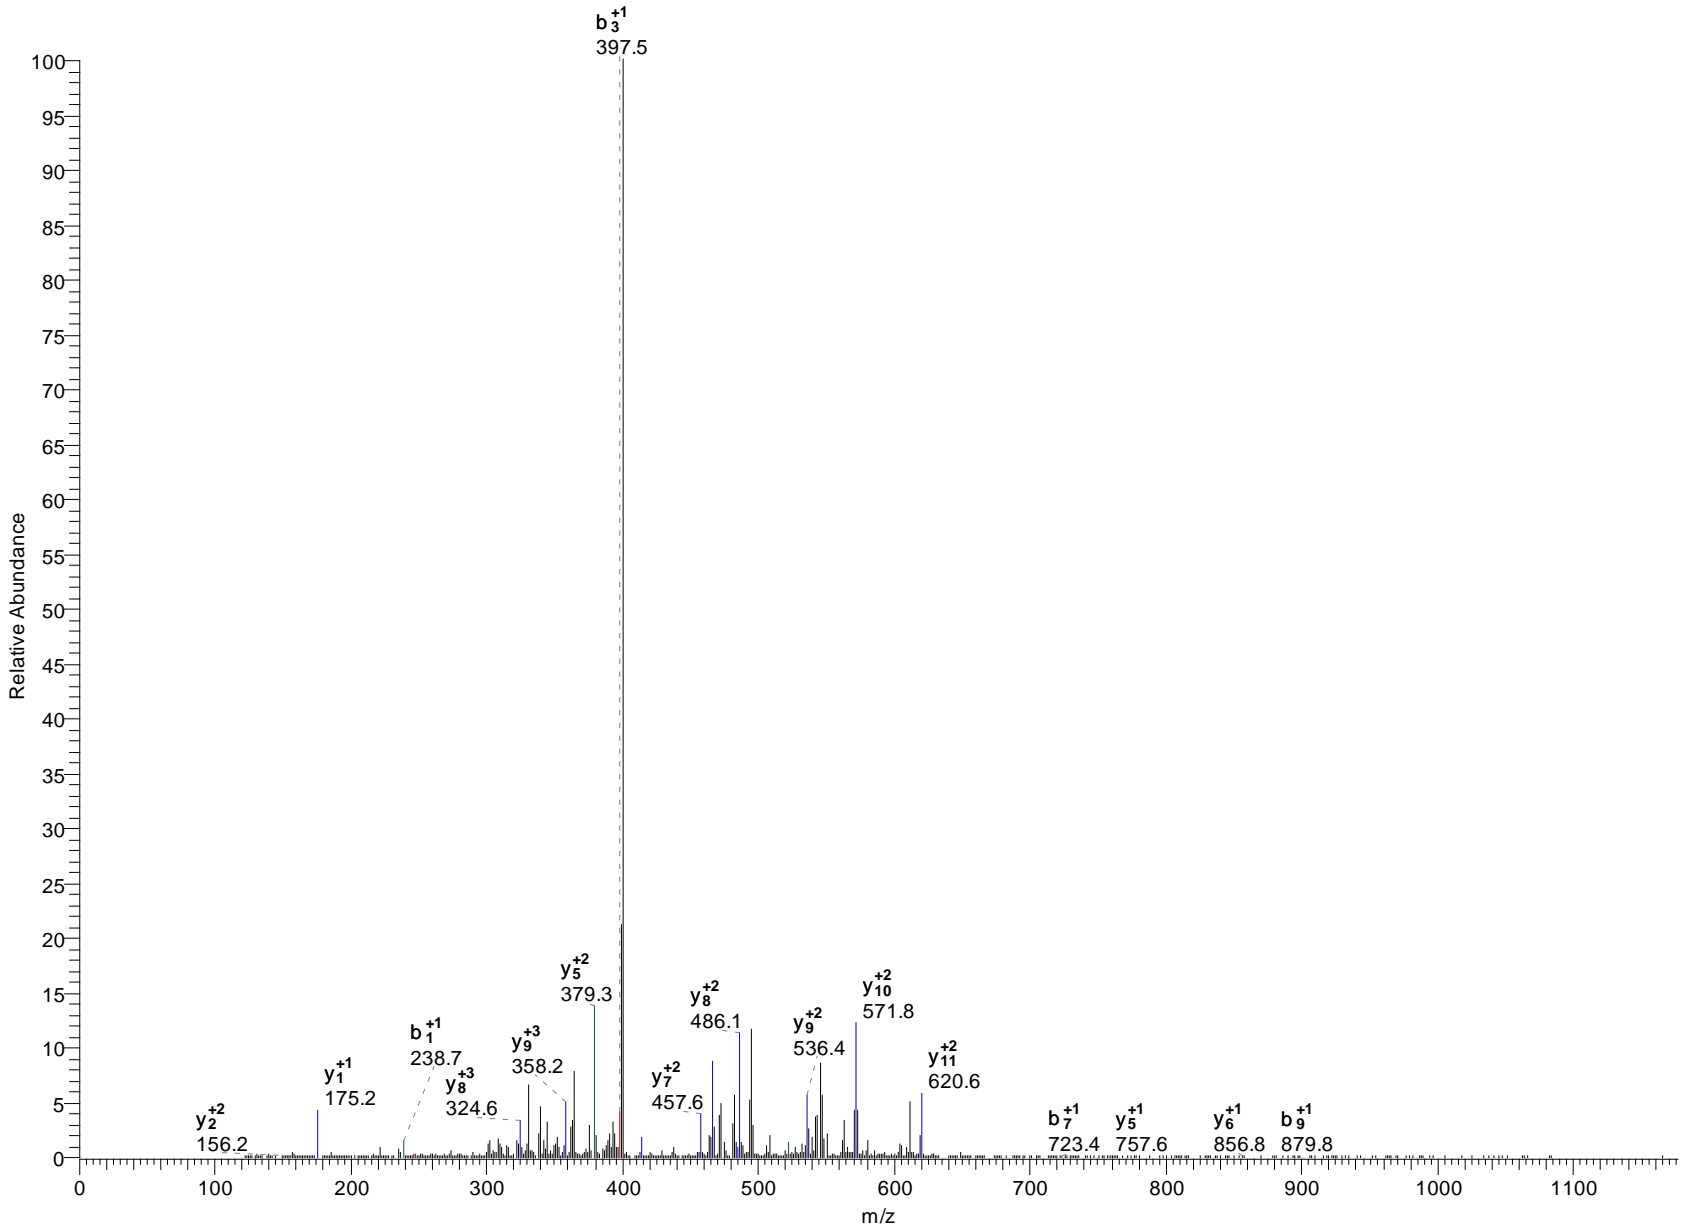

prEIAQDFKpr,me1:1TDLR

H3K79me1:1

#13451-13451 RT:99.78-99.78 NL: 6.41E3

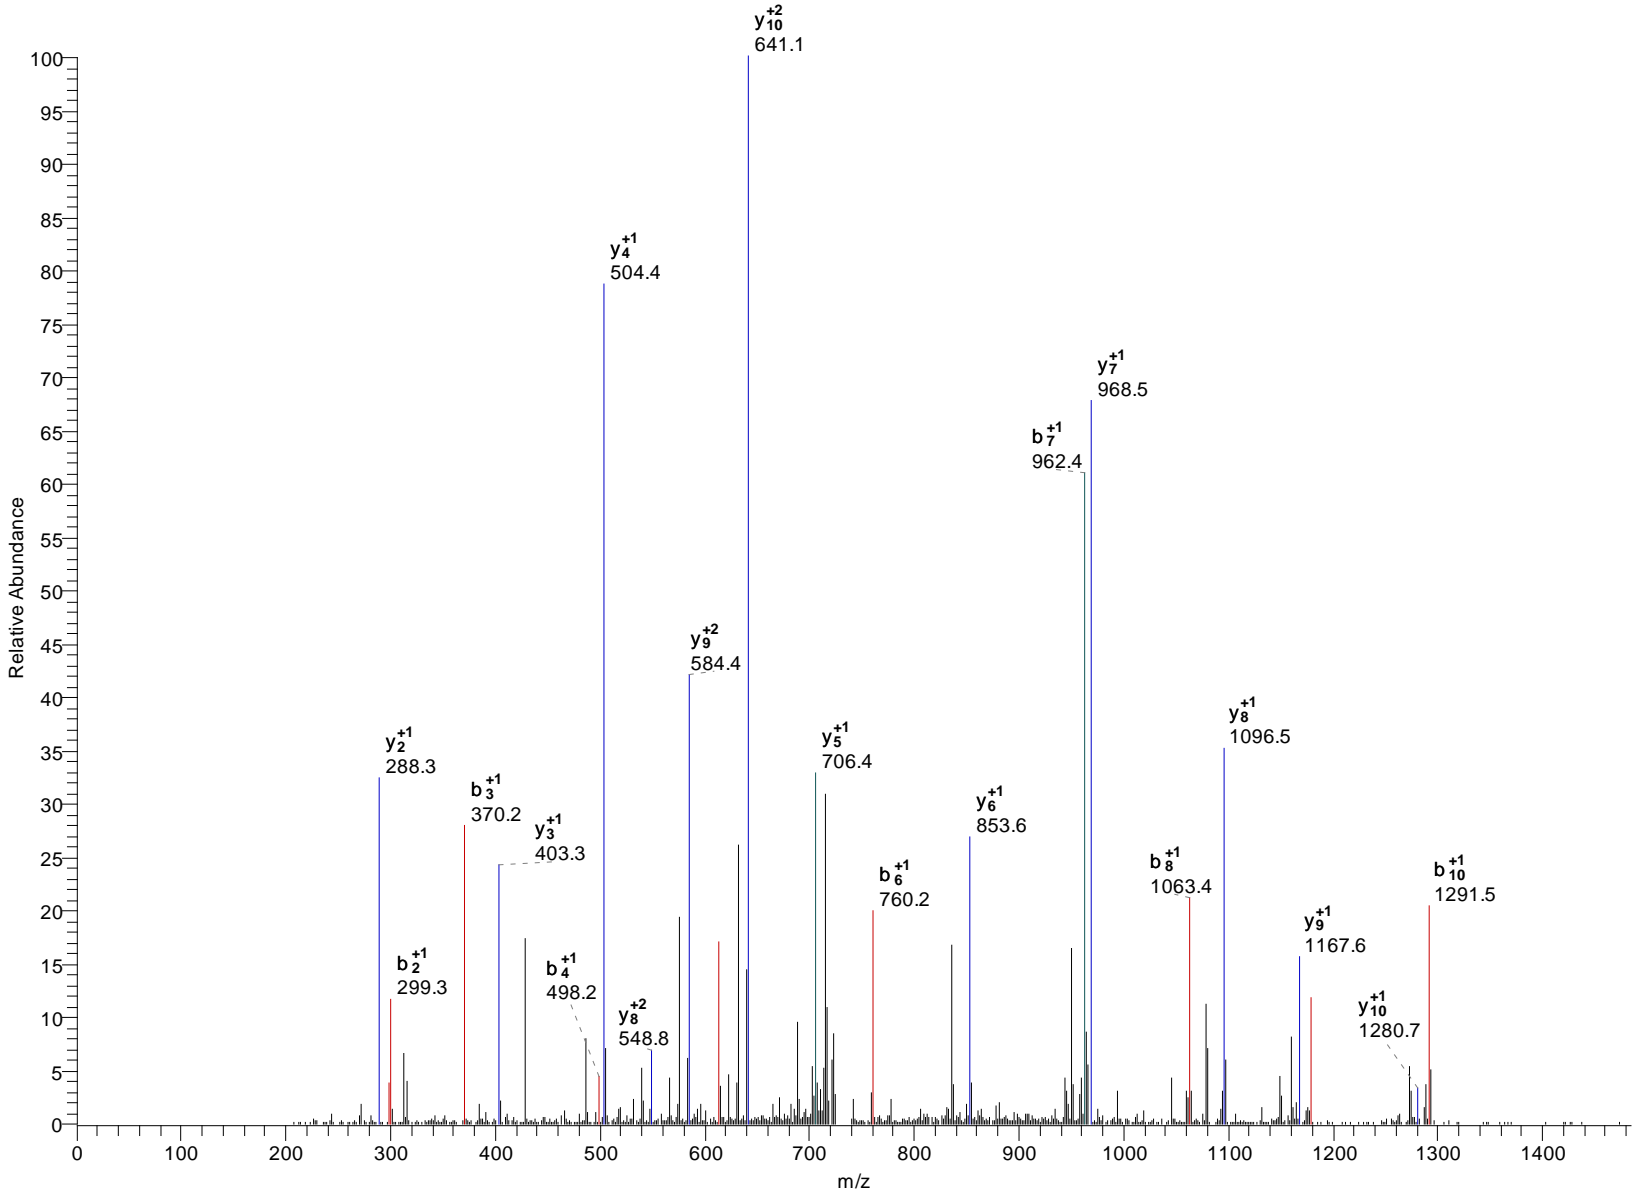



prEIAQDFKme2:1TDLR

H3K79me2:1

#15179-15179 RT:98.21-98.21 NL: 5.65E4

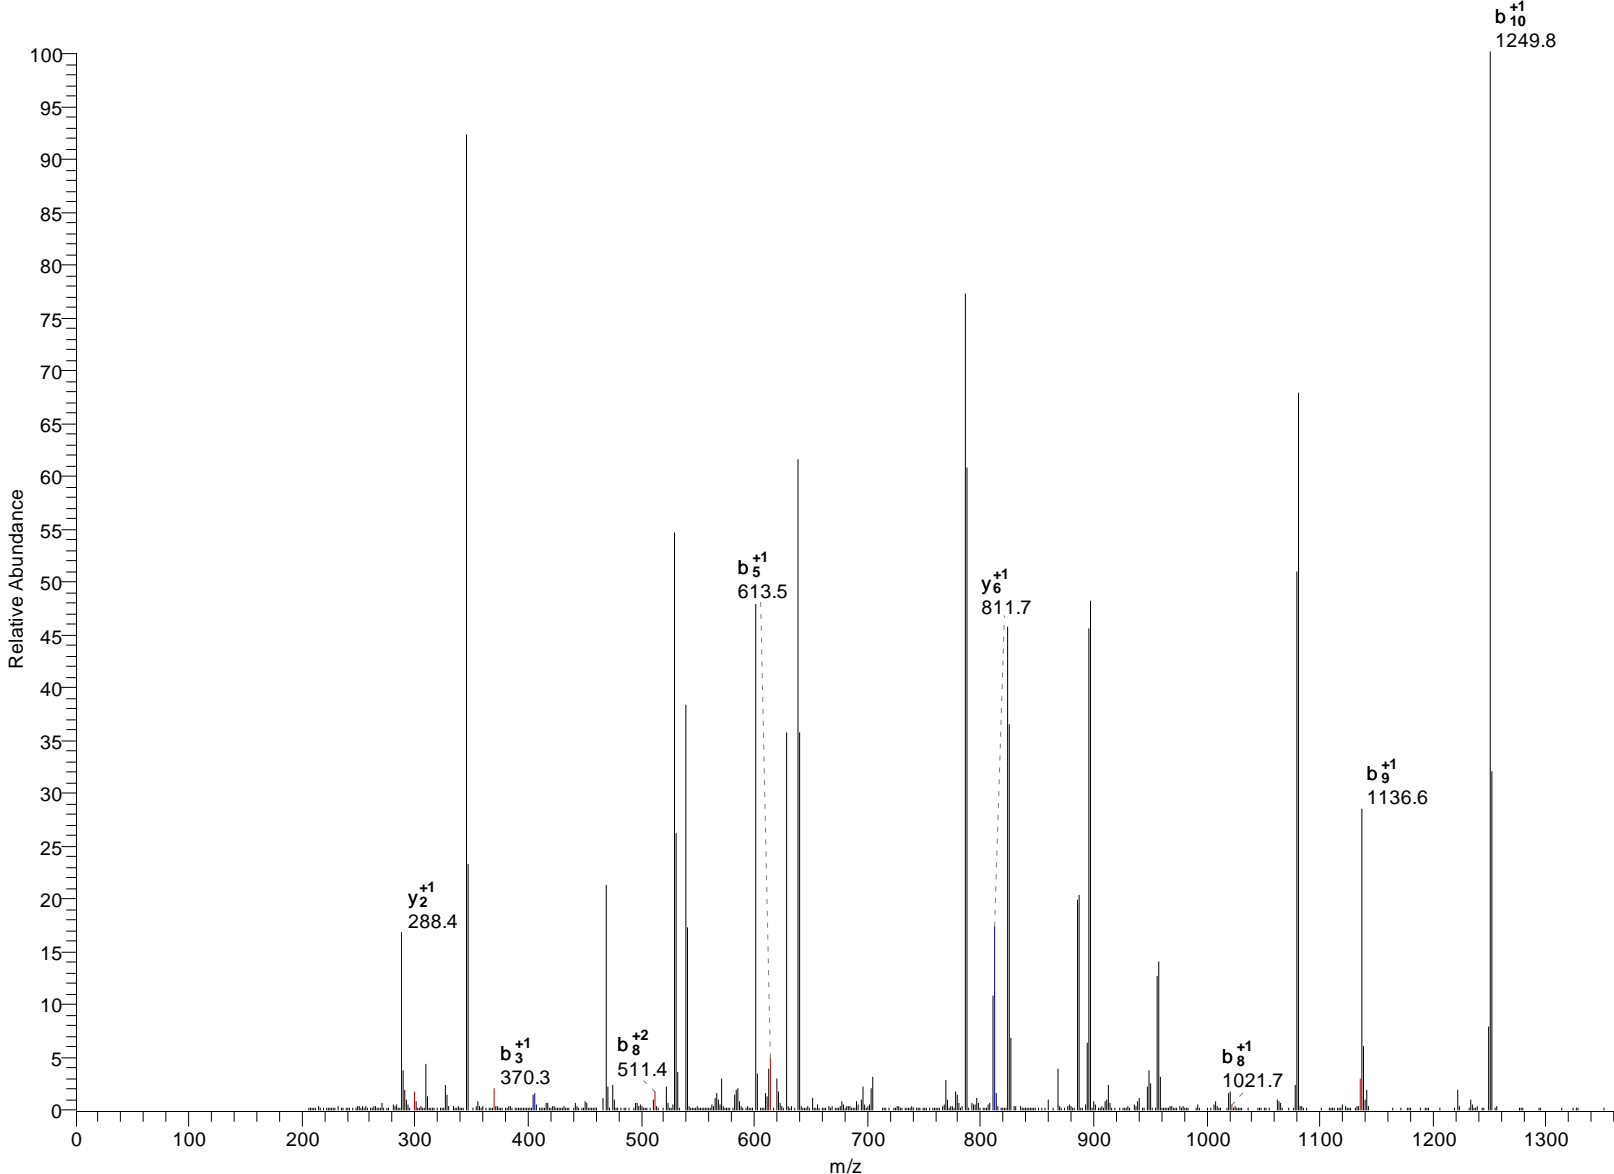

prEIAQDFKme2:2TDLR

H3K79me2:2

#10569-10569 RT:82.10-82.10 NL: 5.28E4

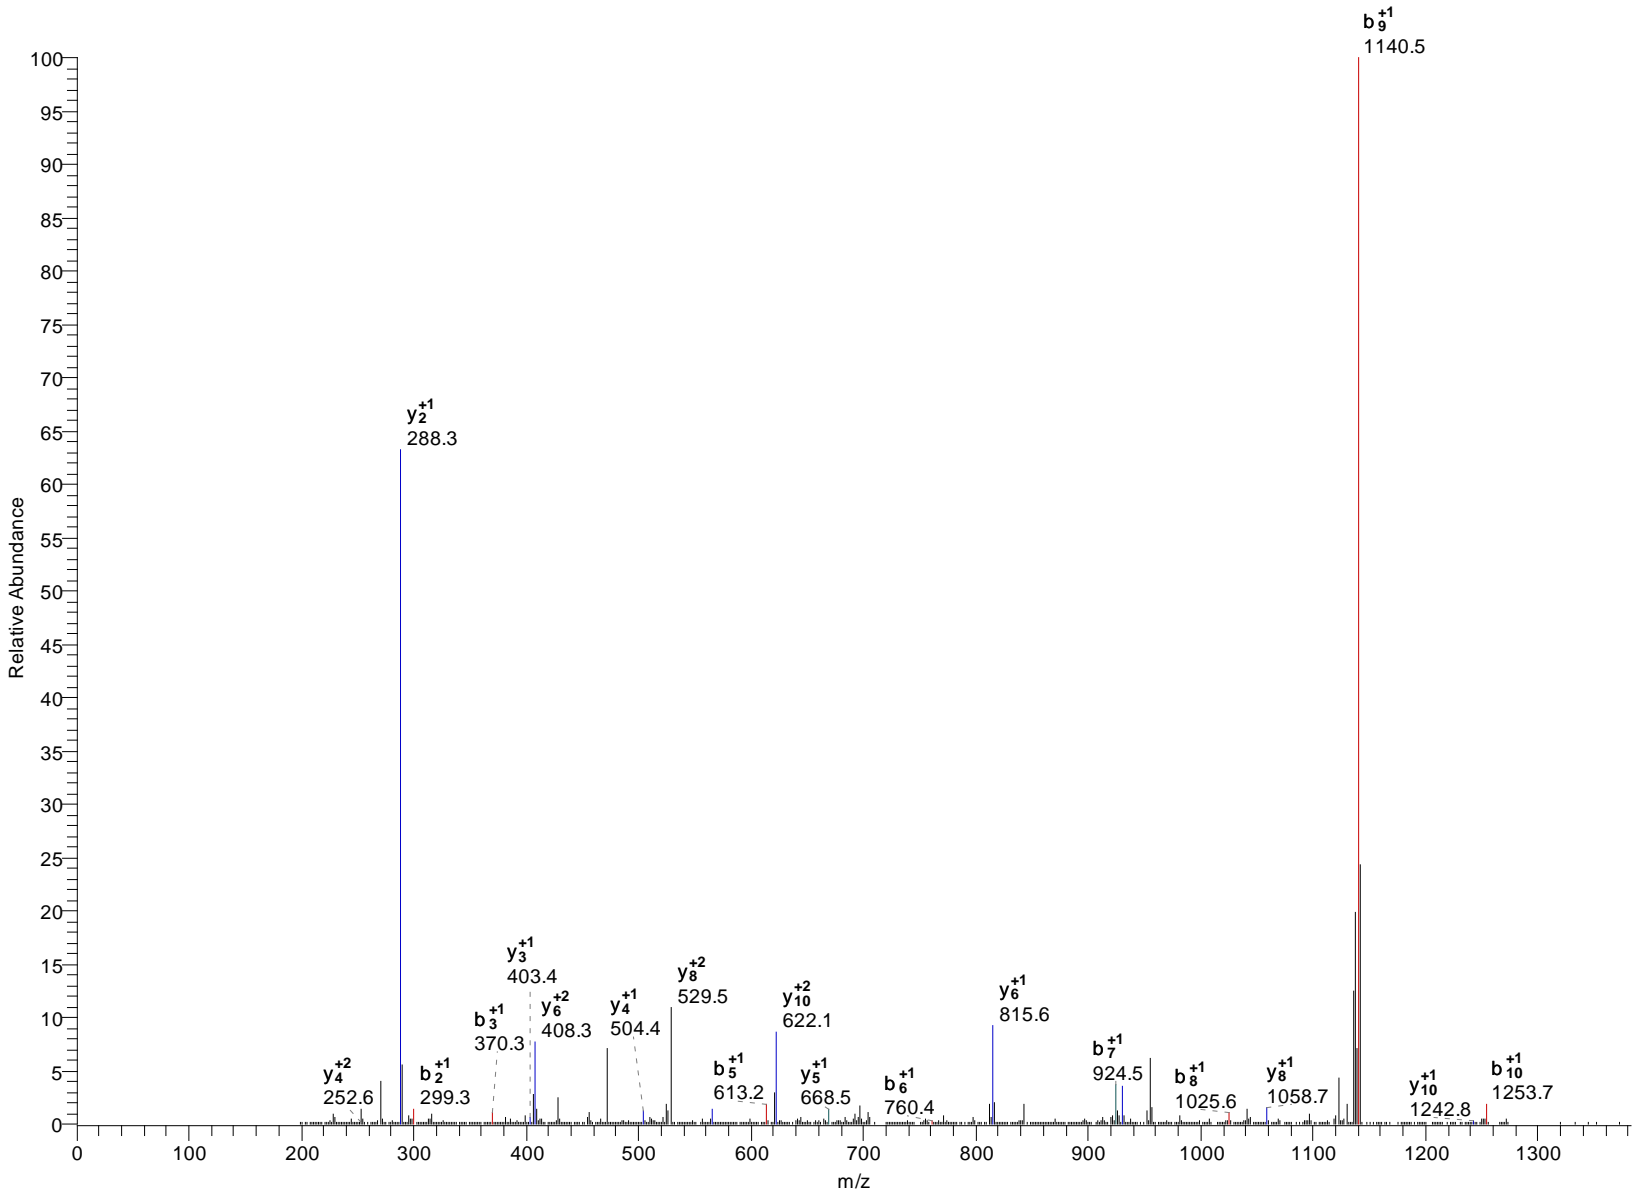

acSGRme1:1GKprGGKprGLGKprGGAKprR

H4R3me1:1

#8181-8181 RT:67.92-67.92 NL: 1.09E3

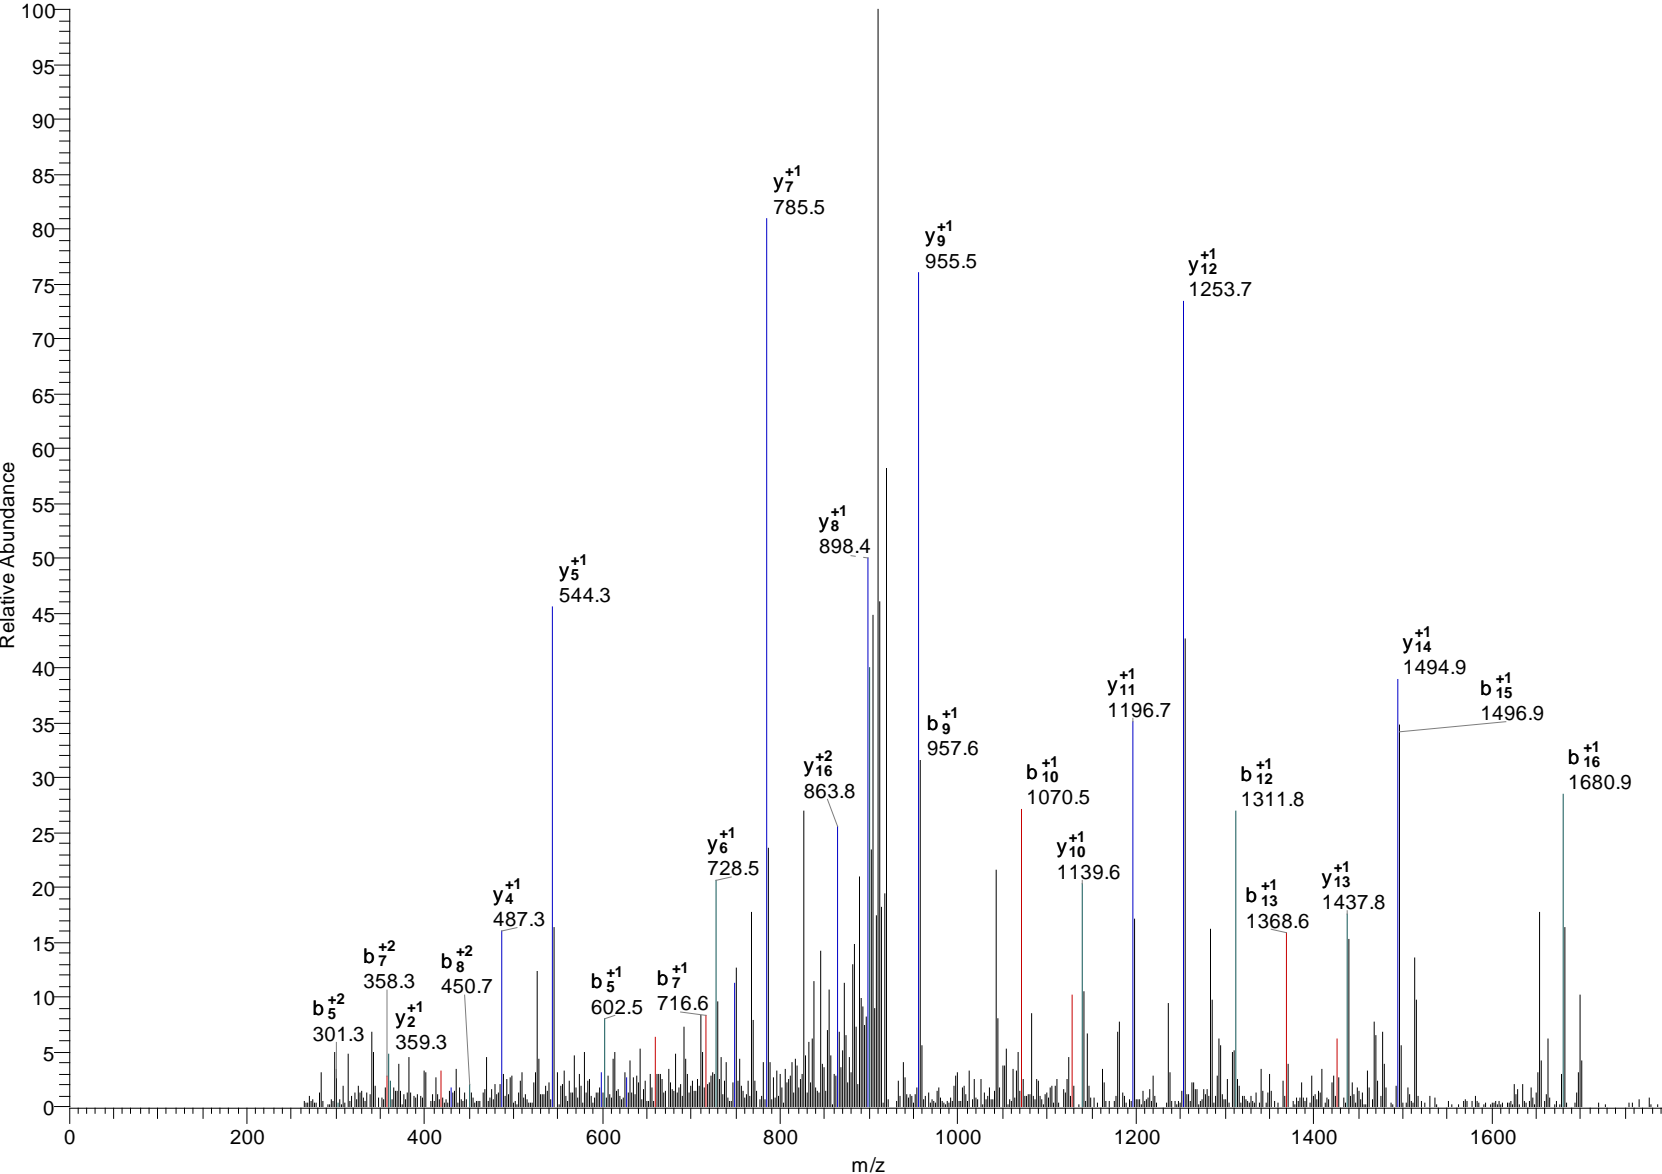

prKpr,me1:1VLR

H4K20me1:1

Me\_kinetics\_T1\_030809\_090309012523 #9953 RT: 66.88 AV: 1 NL: 2.39E5

F: ITMS + c NSI d Full ms2 323.23

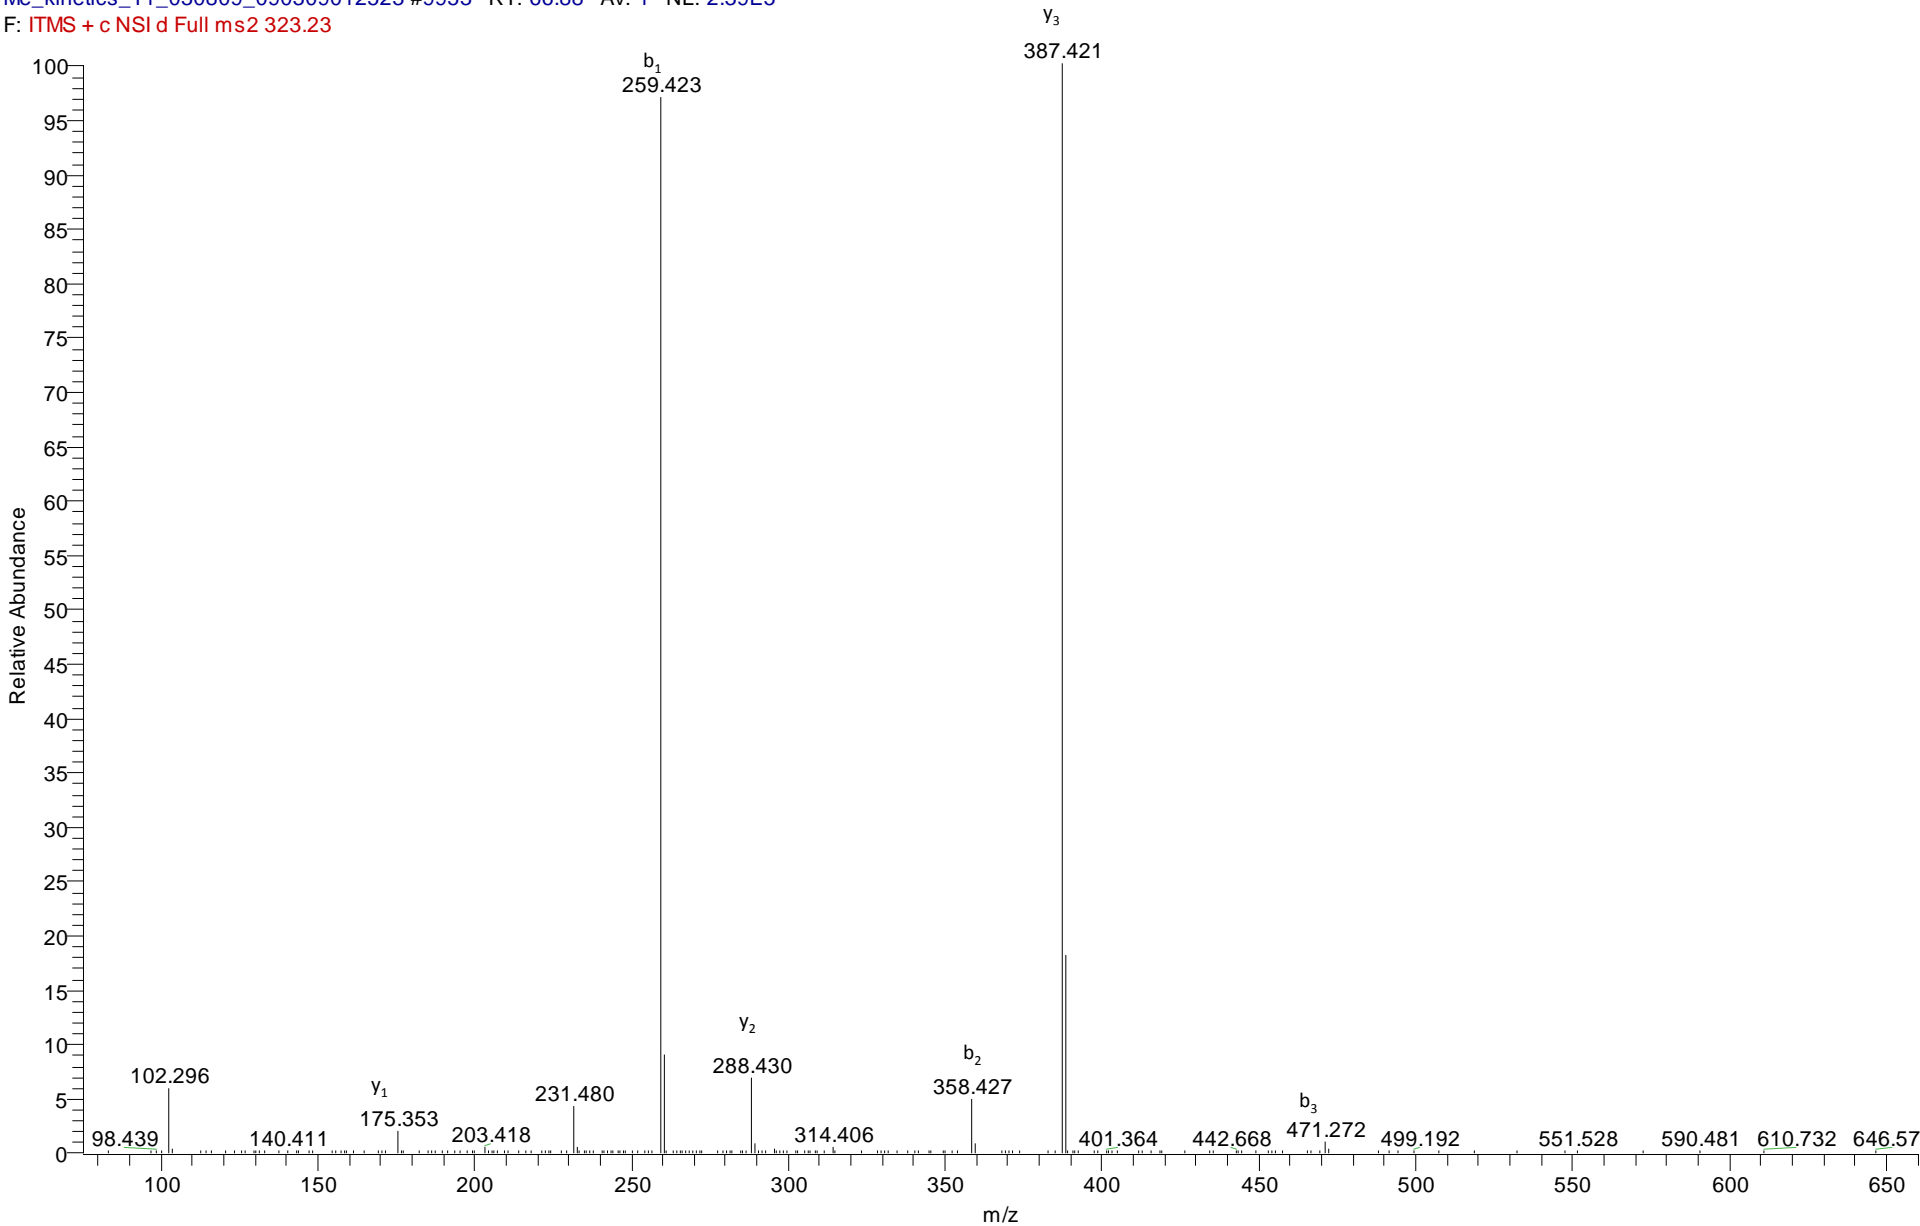

prKme2:1VLR

H4K20me2:1

Me\_kinetics\_T1\_030809\_090309012523 #5561 RT: 41.12 AV: 1 NL: 2.32E4  
F: ITMS + c NSI d Full ms2 302.22

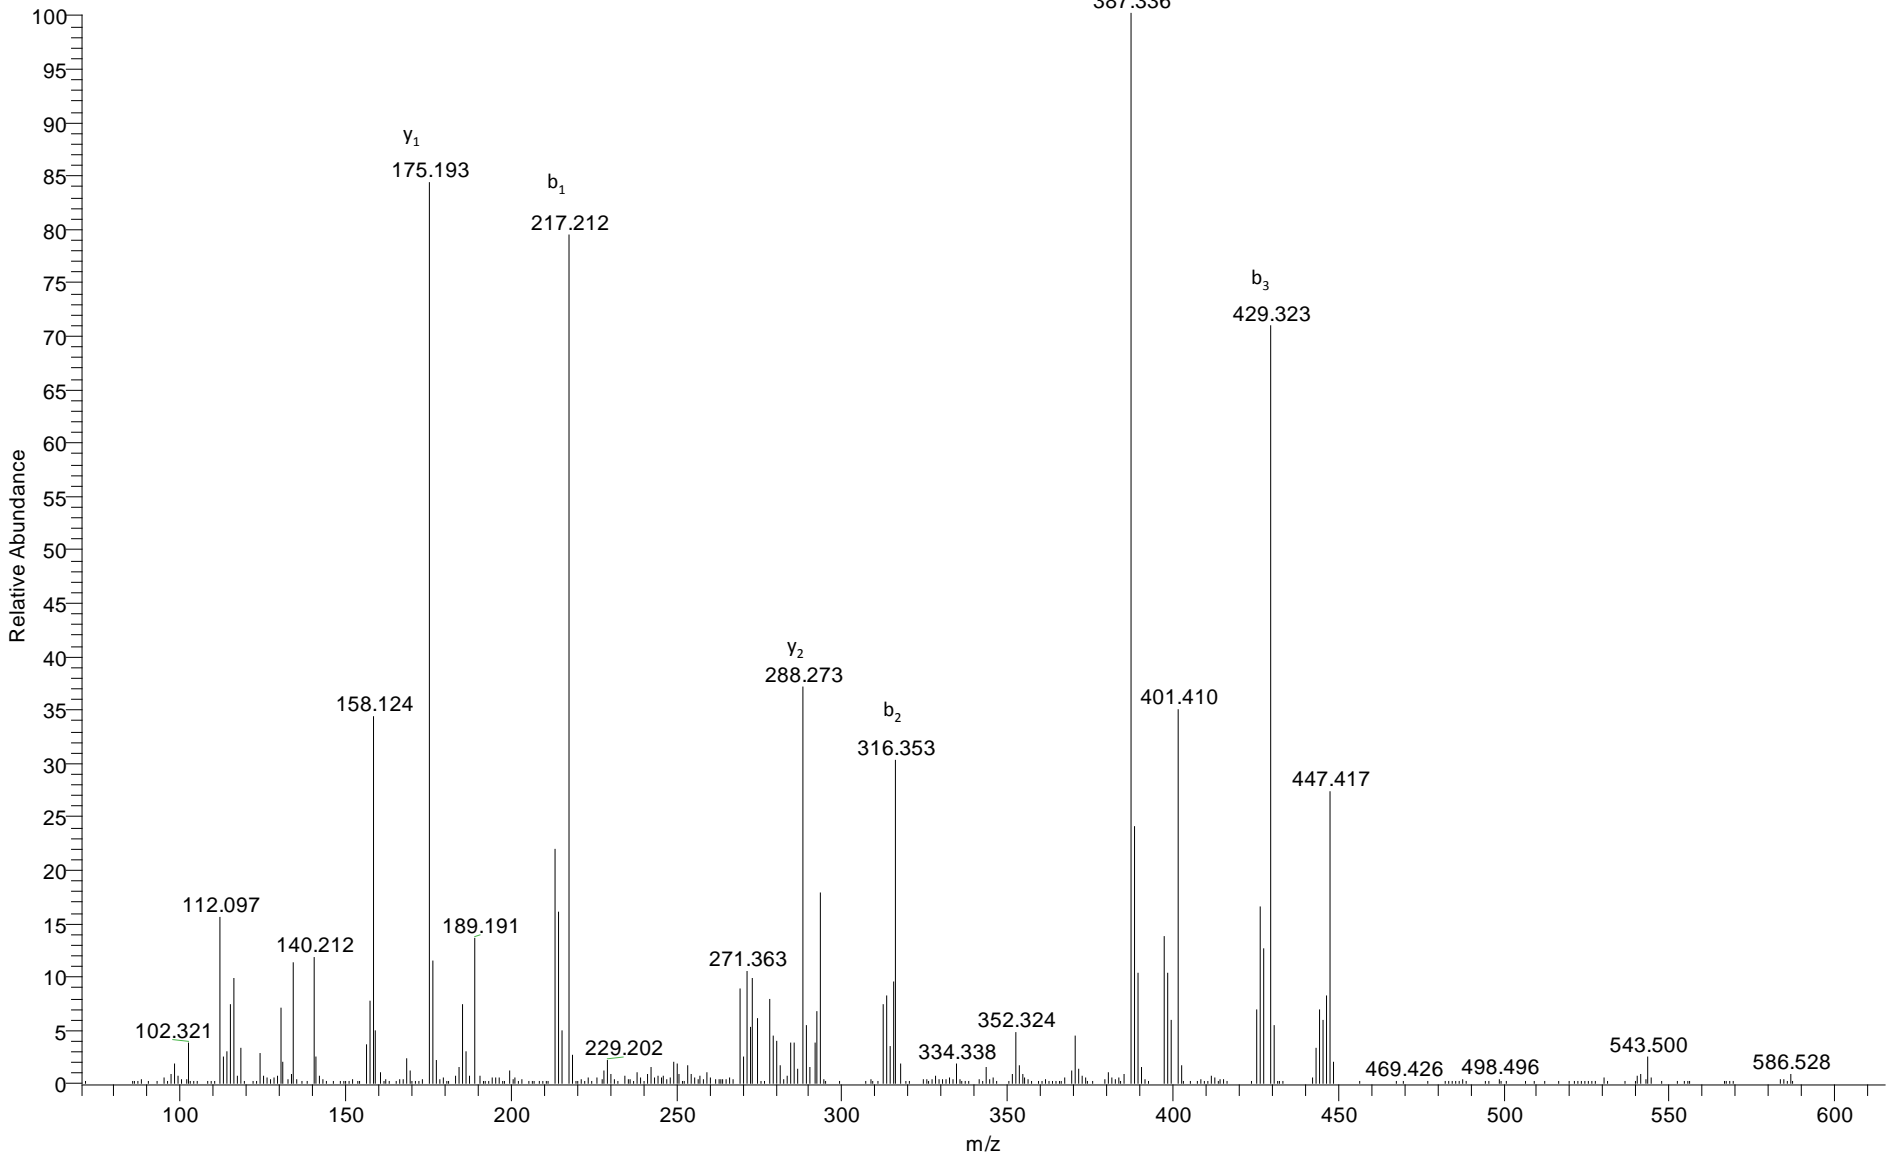

prKme2:2VLR

H4K20me2:2

Me\_kinetics\_T1\_030809\_090309012523 #5373 RT: 40.06 AV: 1 NL: 1.27E5

F: ITMS + c NSI d Full ms2 304.23

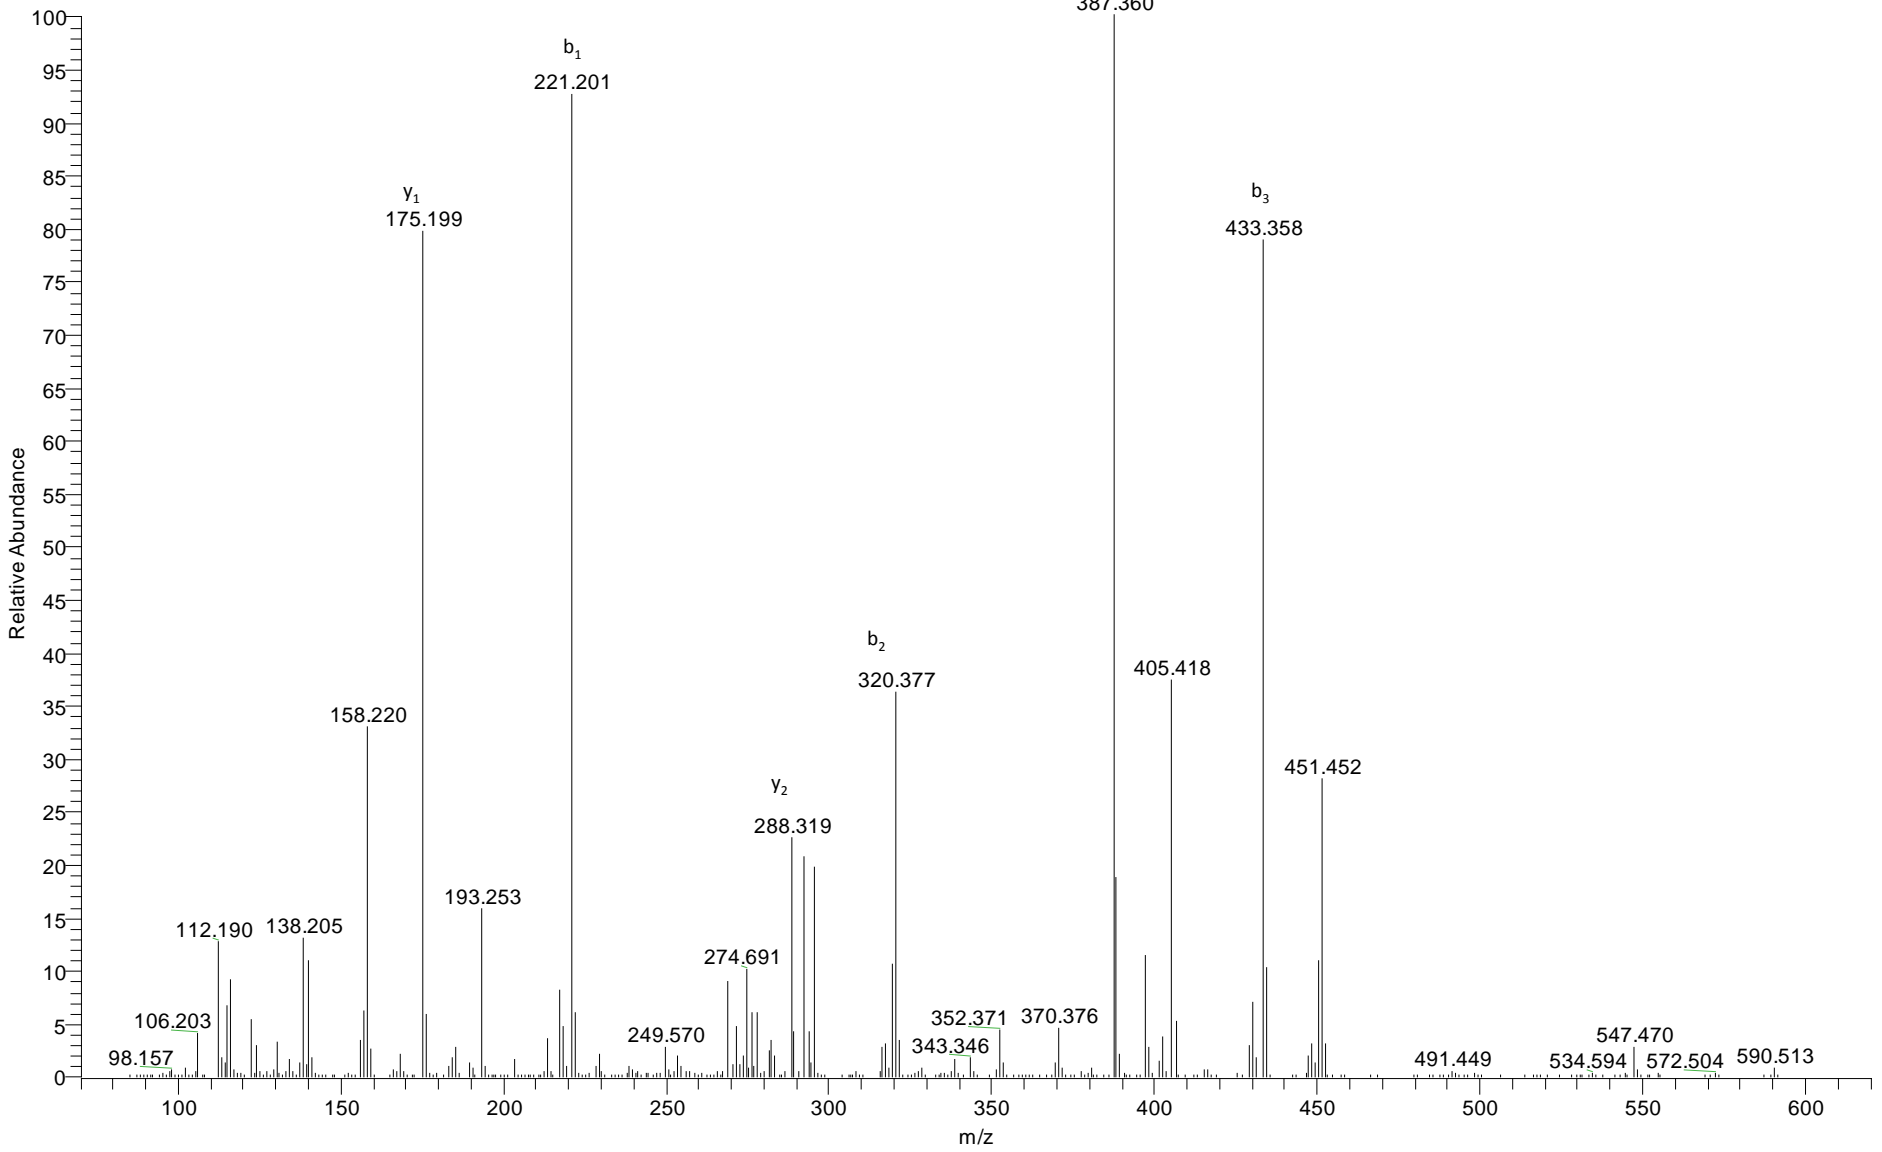

prKme3:1VLR

H4K20me3:1

Me\_kinetics\_T1\_030809\_090309012523 #5237 RT: 39.29 AV: 1 NL: 5.75E3  
F: ITMS + c NSI d Full ms2 309.23

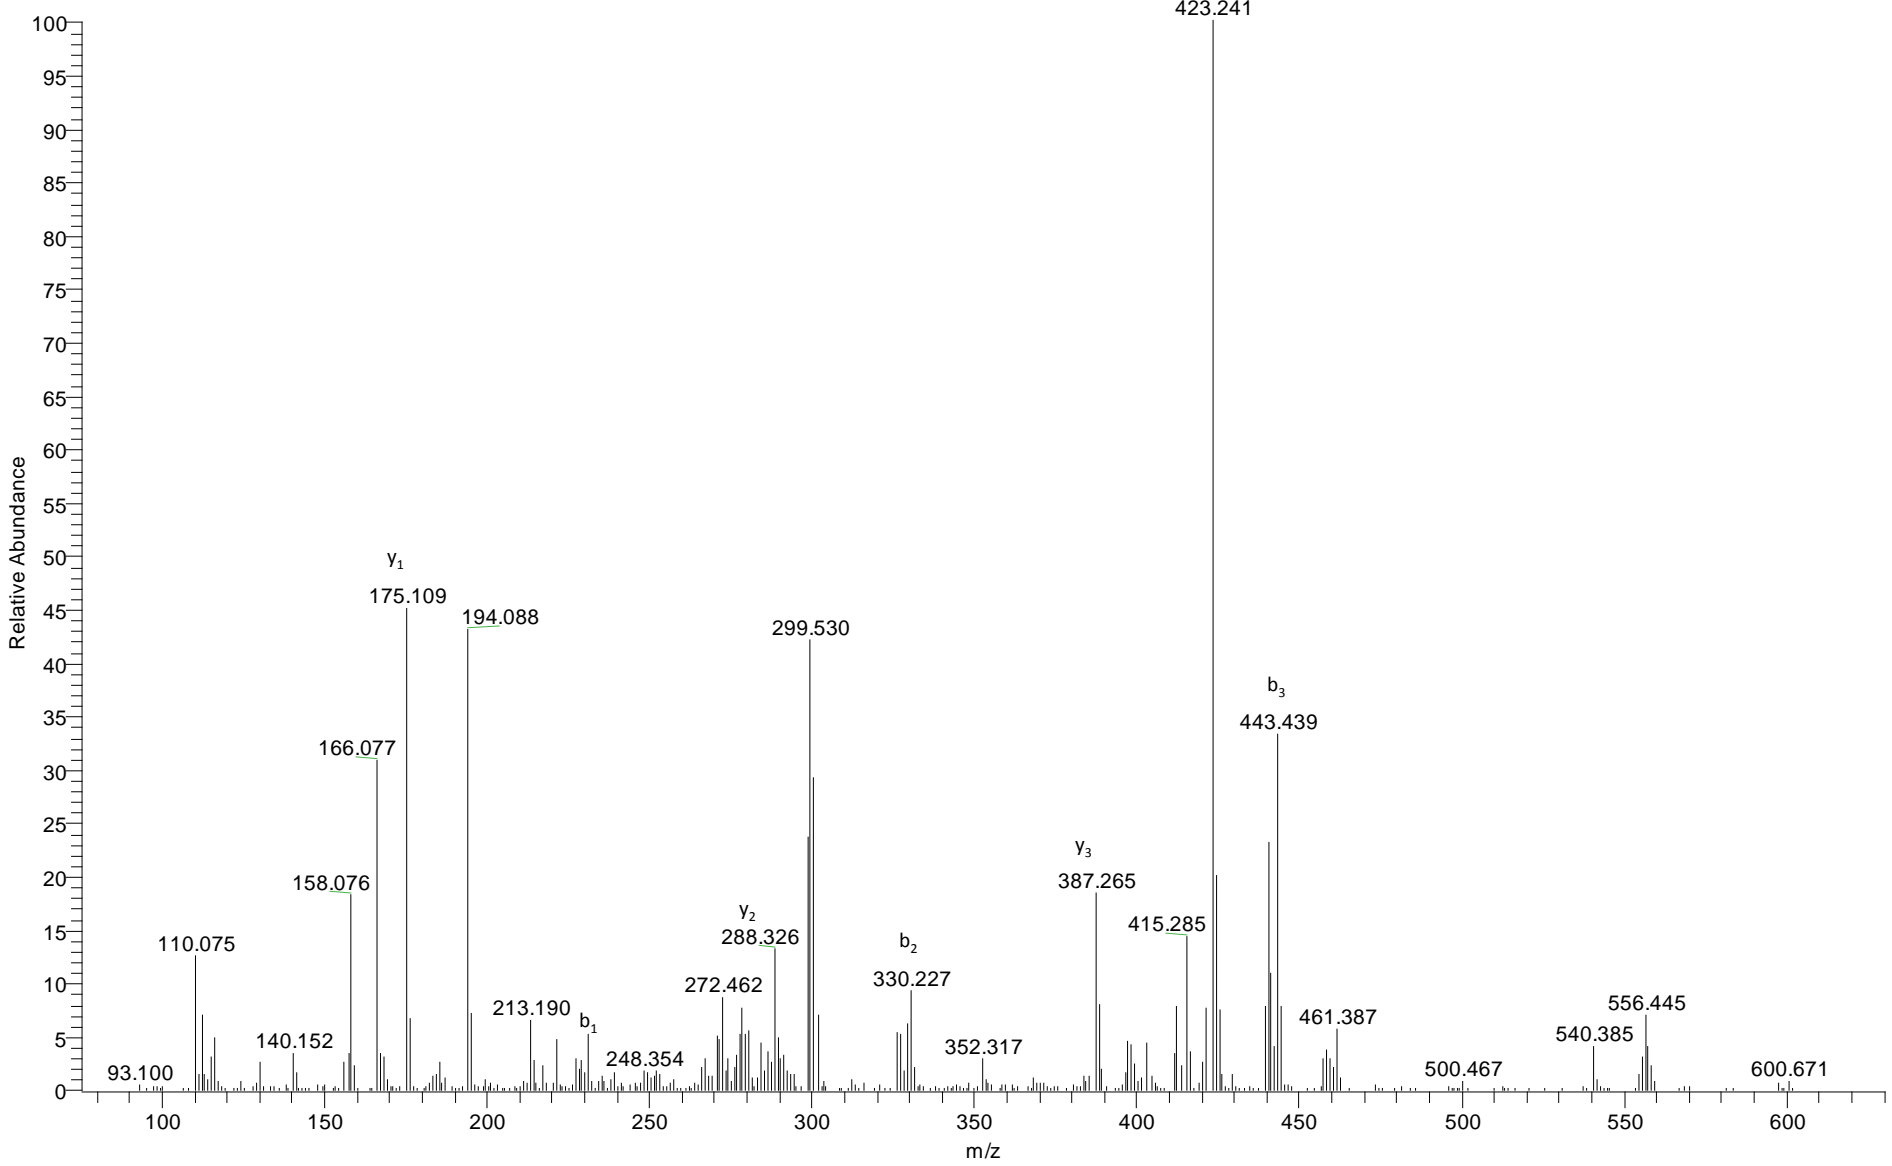

prKme3:2VLR

H4K20me3:2

Me\_kinetics\_T2\_030809 #5184 RT: 40.79 AV: 1 NL: 5.09E3

F: ITMS + c NSI d Full ms2 311.24

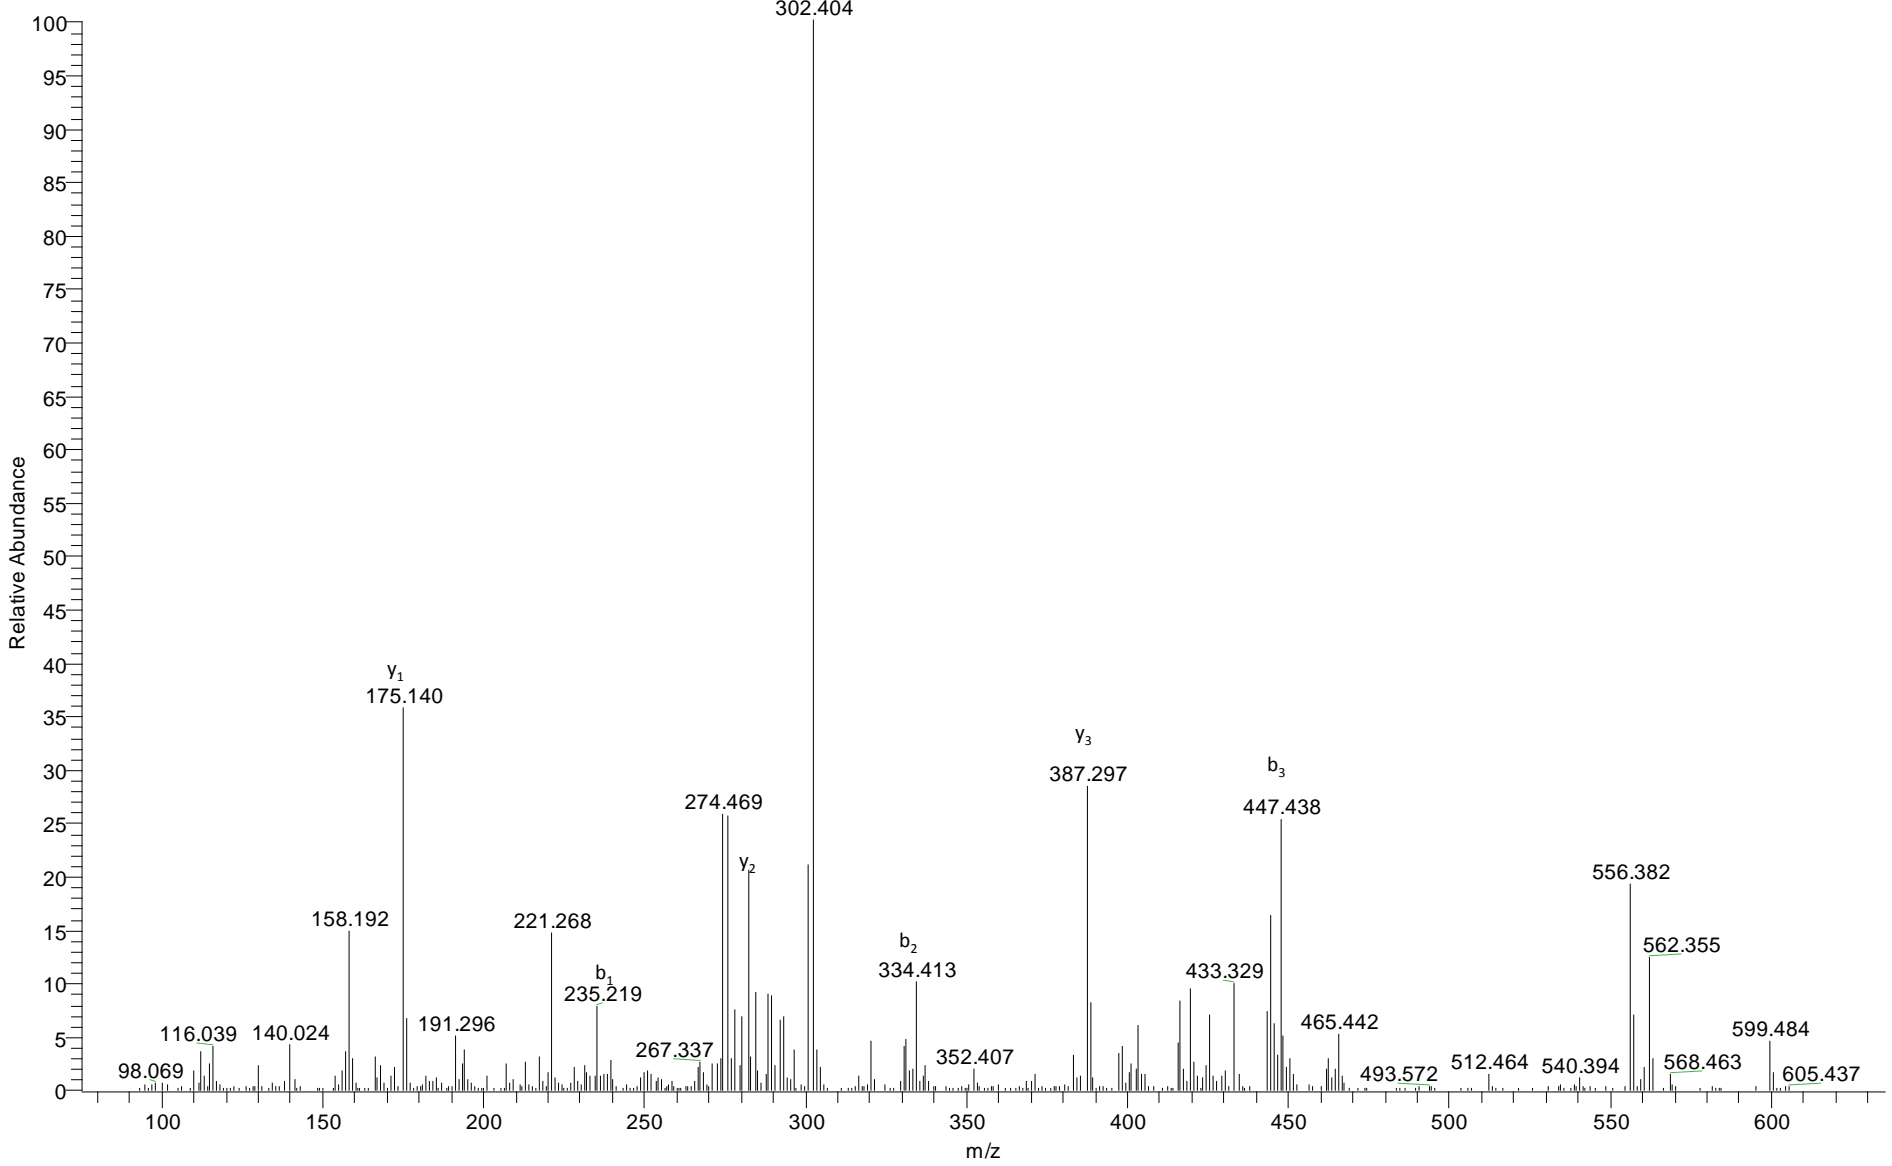



prKme3:3VLR

H4K20me3:3

Me\_kinetics\_T4\_030809 #4835 RT: 36.94 AV: 1 NL: 1.90E3  
F: ITMS + c NSI d Full ms2 313.25

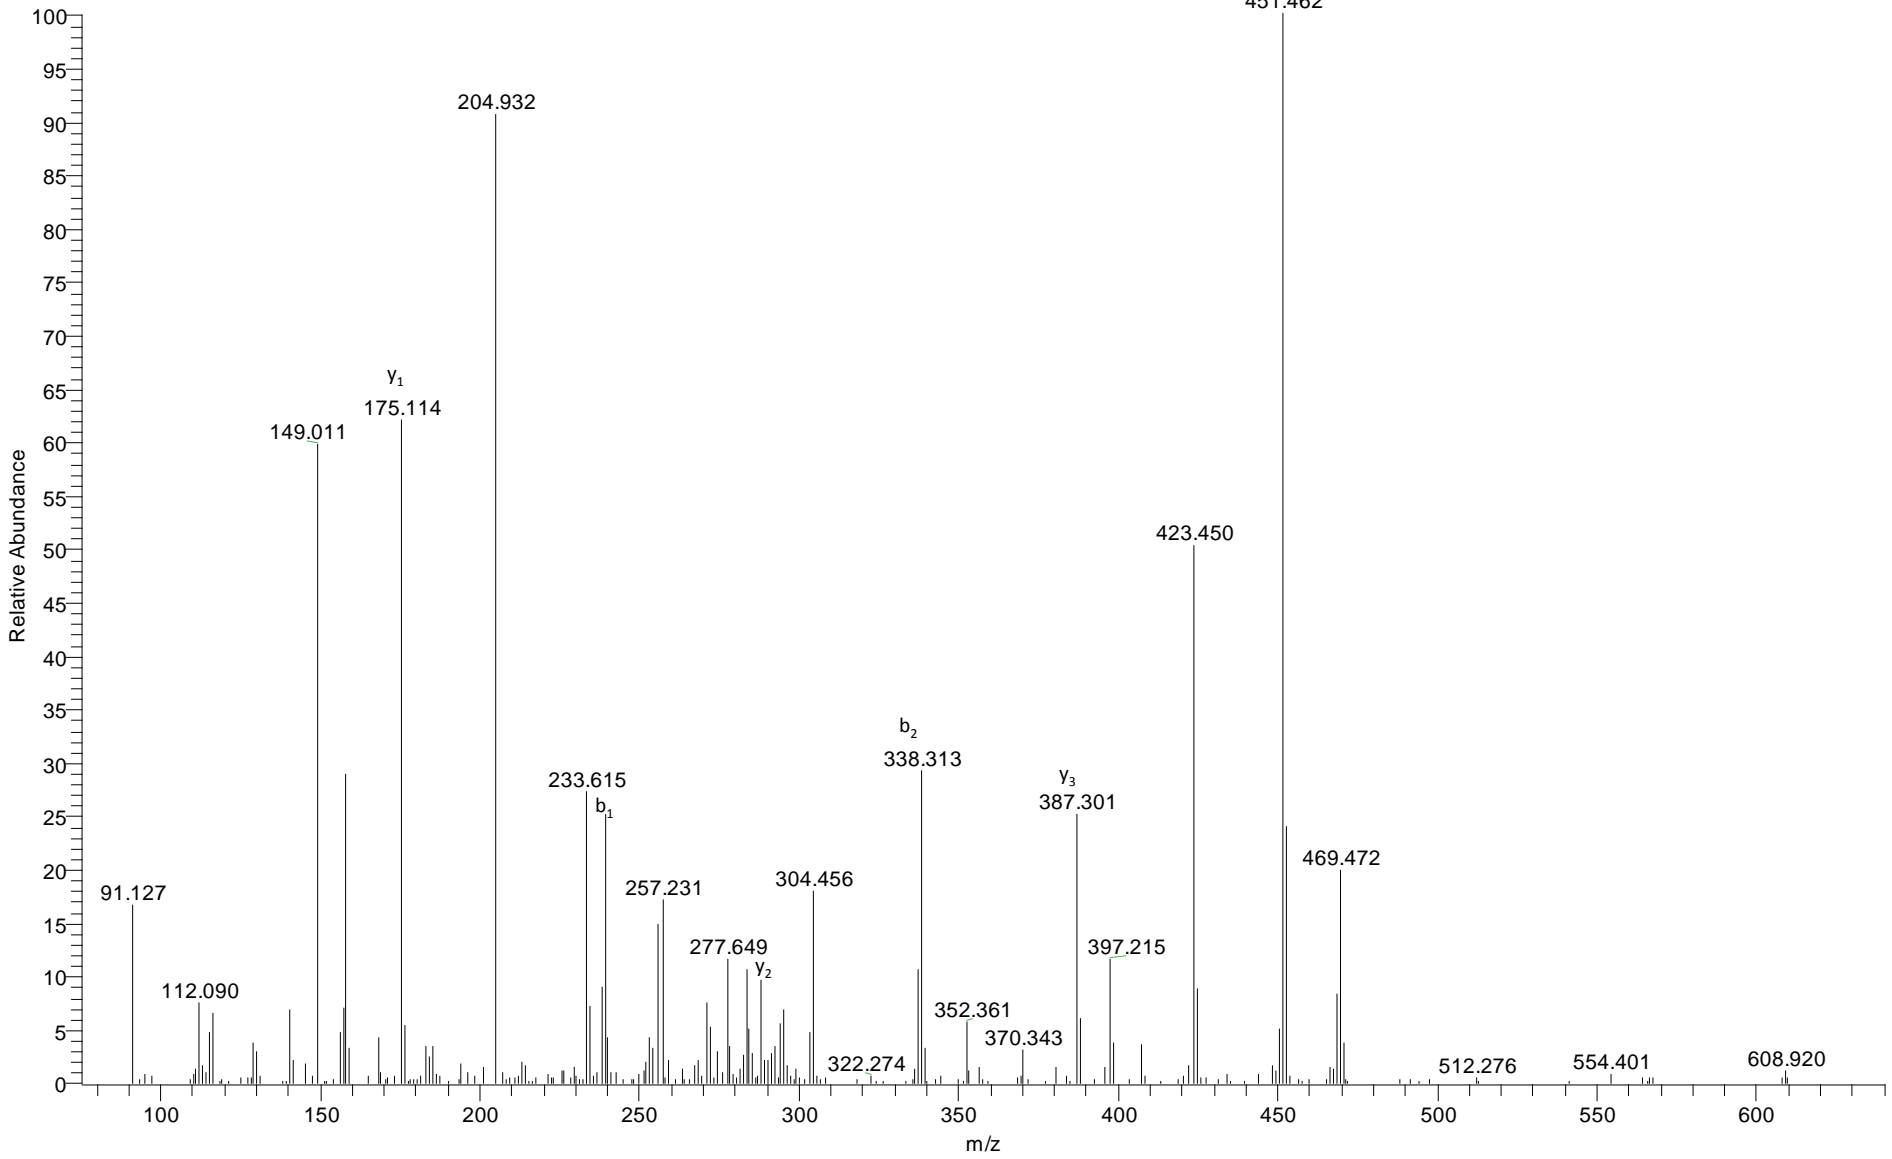

## Supplemental Figure 2

SUPPLEMENTAL FIGURE 2. Differential equations used for modeling the relative abundances of residues that can be mono-methylated (A), mono- and dimethylated (B), or mono-, di-, and trimethylated (C). In the MATLAB code (Supplemental Data), we account for dilution of the various species due to cell division in the fitting of  $\mu$ . For calculating the time required for half-maximal labeling, we fit the relative levels of a fully labeled peptide species X to equation (D) at each day after introduction to labeled media. In the equation,  $c_1$  represents the final relative level of X (more precisely, the change between the maximum relative level and the initial relative level, which is 0 for the fully labeled species), and  $c_2$  represents the time constant. Multiplying the time constant by  $\ln(2)$  yields the half-max time ( $t_{1/2}$ ) of maximal label incorporation.

A:

$$d[0:0]/dt = \alpha - k_{0 \rightarrow 1}[0:0] - k'_{0 \rightarrow 1}[0:0] + k_{1 \rightarrow 0}[1:1] + k_{1 \rightarrow 0}[1:0] - \mu_0[0:0]$$

$$d[1:0]/dt = -k_{1 \rightarrow 0}[1:0] + k'_{0 \rightarrow 1}[0:0] - \mu_1[1:0]$$

$$d[1:1]/dt = k_{0 \rightarrow 1}[0:0] - k_{1 \rightarrow 0}[1:1] - \mu_1[1:1]$$

B:

$$d[0:0]/dt = \alpha - k_{0 \rightarrow 1}[0:0] - k'_{0 \rightarrow 1}[0:0] + k_{1 \rightarrow 0}[1:1] + k_{1 \rightarrow 0}[1:0] - \mu_0[0:0]$$

$$d[1:0]/dt = -k_{1 \rightarrow 0}[1:0] + k'_{0 \rightarrow 1}[0:0] - k_{1 \rightarrow 2}[1:0] + k_{2 \rightarrow 1}[2:1] + k_{2 \rightarrow 1}[2:0] - k'_{1 \rightarrow 2}[1:0] - \mu_1[1:0]$$

$$d[1:1]/dt = -k_{1 \rightarrow 0}[1:1] + k_{0 \rightarrow 1}[0:0] - k_{1 \rightarrow 2}[1:1] + k_{2 \rightarrow 1}[2:1] + k_{2 \rightarrow 1}[2:2] - k'_{1 \rightarrow 2}[1:1] - \mu_1[1:1]$$

$$d[2:0]/dt = -2k_{2 \rightarrow 1}[2:0] + k'_{1 \rightarrow 2}[1:0] - \mu_2[2:0]$$

$$d[2:1]/dt = -2k_{2 \rightarrow 1}[2:1] + k'_{1 \rightarrow 2}[1:1] + k_{1 \rightarrow 2}[1:0] - \mu_2[2:1]$$

$$d[2:2]/dt = -2k_{2 \rightarrow 1}[2:2] + k_{1 \rightarrow 2}[1:1] - \mu_2[2:2]$$

C:

$$d[0:0]/dt = \alpha - k_{0 \rightarrow 1}[0:0] - k'_{0 \rightarrow 1}[0:0] + k_{1 \rightarrow 0}[1:1] + k_{1 \rightarrow 0}[1:0] - \mu_0[0:0]$$

$$d[1:0]/dt = -k_{1 \rightarrow 0}[1:0] + k'_{0 \rightarrow 1}[0:0] - k_{1 \rightarrow 2}[1:0] + k_{2 \rightarrow 1}[2:1] + 2k_{2 \rightarrow 1}[2:0] - k'_{1 \rightarrow 2}[1:0] - \mu_1[1:0]$$

$$d[1:1]/dt = -k_{1 \rightarrow 0}[1:1] + k_{0 \rightarrow 1}[0:0] - k_{1 \rightarrow 2}[1:1] + k_{2 \rightarrow 1}[2:1] + 2k_{2 \rightarrow 1}[2:2] - k'_{1 \rightarrow 2}[1:1] - \mu_1[1:1]$$

$$d[2:0]/dt = -2k_{2 \rightarrow 1}[2:0] + k'_{1 \rightarrow 2}[1:0] - k'_{2 \rightarrow 3}[2:0] - k_{2 \rightarrow 3}[2:0] + 3k_{3 \rightarrow 2}[3:0] + k_{3 \rightarrow 2}[3:1] - \mu_2[2:0]$$

$$d[2:1]/dt = -2k_{2 \rightarrow 1}[2:1] + k'_{1 \rightarrow 2}[1:1] + k_{1 \rightarrow 2}[1:0] - k_{2 \rightarrow 3}[2:1] + 2k_{3 \rightarrow 2}[3:2] + k_{3 \rightarrow 2}[3:1] - k'_{2 \rightarrow 3}[2:1] - \mu_2[2:1]$$

$$d[2:2]/dt = -2k_{2 \rightarrow 1}[2:2] + k_{1 \rightarrow 2}[1:1] - k_{2 \rightarrow 3}[2:2] + 3k_{3 \rightarrow 2}[3:3] + k_{3 \rightarrow 2}[3:2] - k'_{2 \rightarrow 3}[2:2] - \mu_2[2:2]$$

$$d[3:0]/dt = -3k_{3 \rightarrow 2}[3:0] + k'_{2 \rightarrow 3}[2:0] - \mu_3[3:0]$$

$$d[3:1]/dt = k_{2 \rightarrow 3}[2:0] - 3k_{3 \rightarrow 2}[3:1] + k'_{2 \rightarrow 3}[2:1] - \mu_3[3:1]$$

$$d[3:2]/dt = k_{2 \rightarrow 3}[2:1] - 3k_{3 \rightarrow 2}[3:2] + k'_{2 \rightarrow 3}[2:2] - \mu_3[3:2]$$

$$d[3:3]/dt = k_{2 \rightarrow 3}[2:2] - 3k_{3 \rightarrow 2}[3:3] - \mu_3[3:3]$$

D:

$$[X] = c_1 - c_1 \times \exp(-t/c_2)$$

# Supplemental Figure 3 (14 MS spectra slides)

SUPPLEMENTAL FIG 3. MS spectra of the turnover for all peptides analyzed in the study, from day 0 to day 1 post introduction to labeled media. For peptides that can exist as non-oxidized or oxidized forms (labeled with “ox” in Sup. Table 1), only the non-oxidized form is provided. Furthermore, for peptides that can exist in multiple charge states, only one charge state is provided.

Day 0

H3K4me1

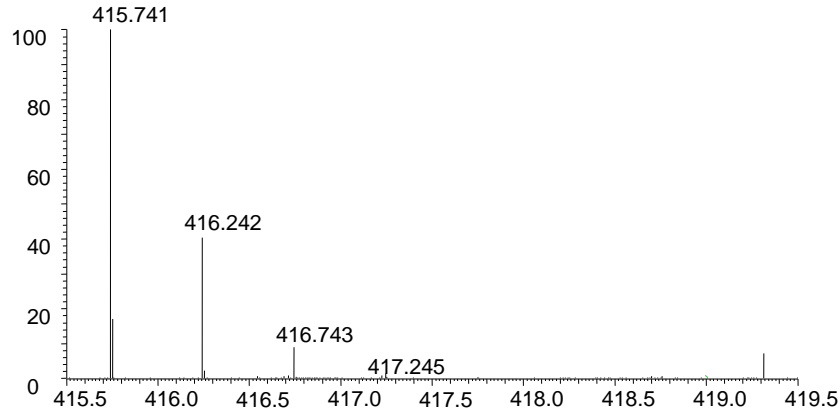

H3K18me1

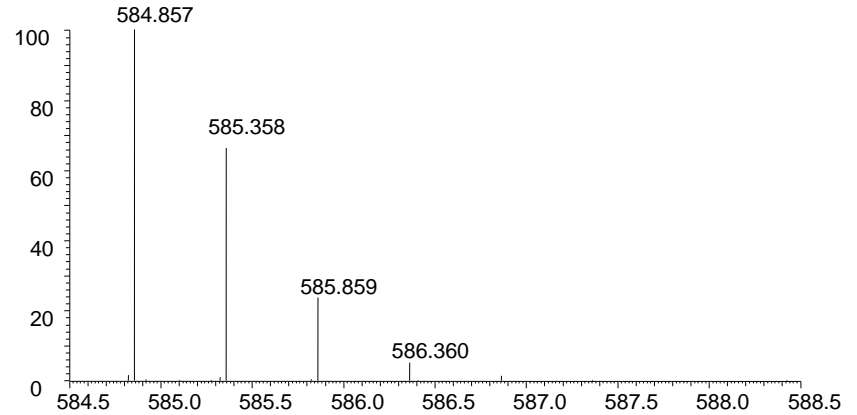

Day 1

H3K4me1

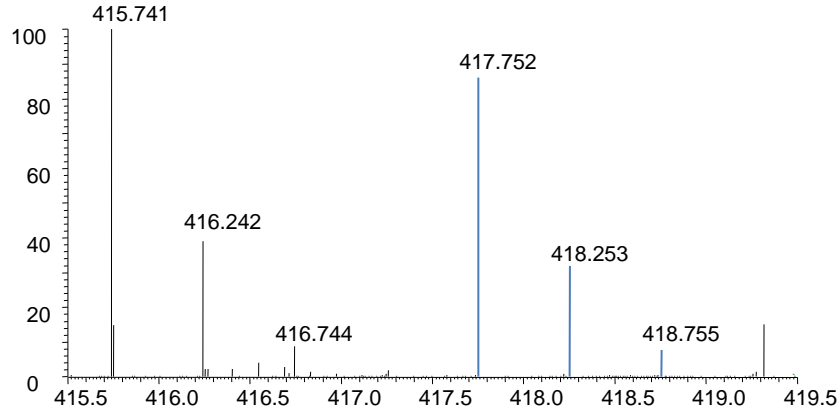

H3K18me1

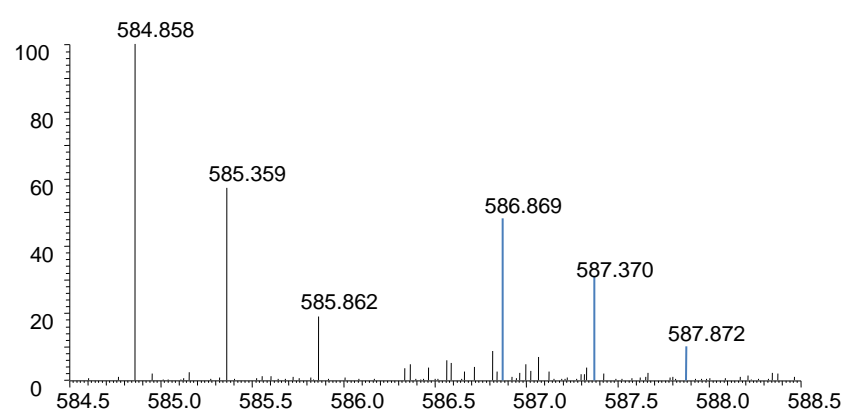

m/z

# H3K27me3

# H3K27me2K36me1

Day 0

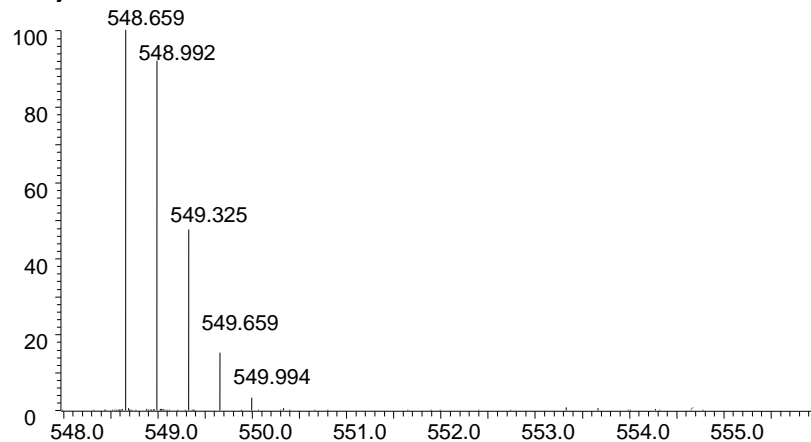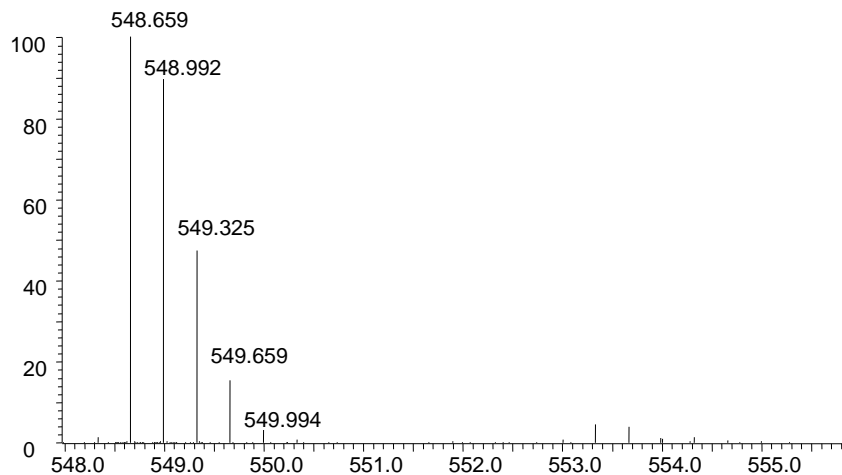

Day 1

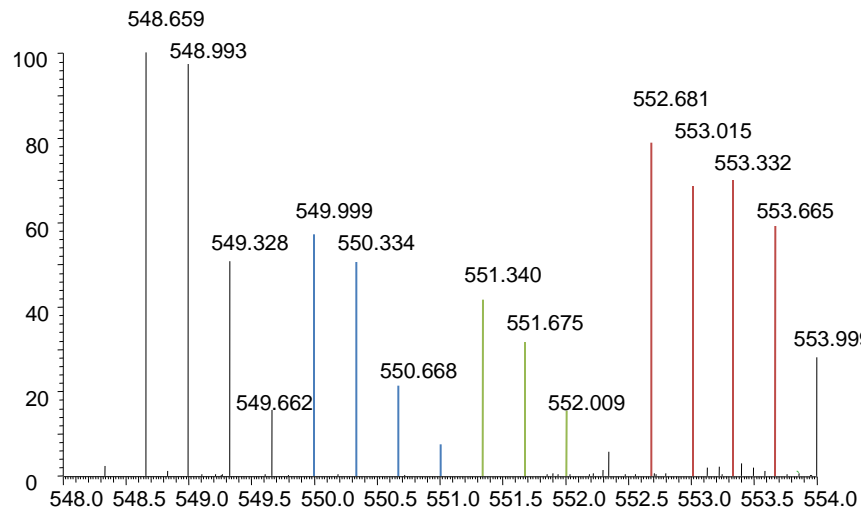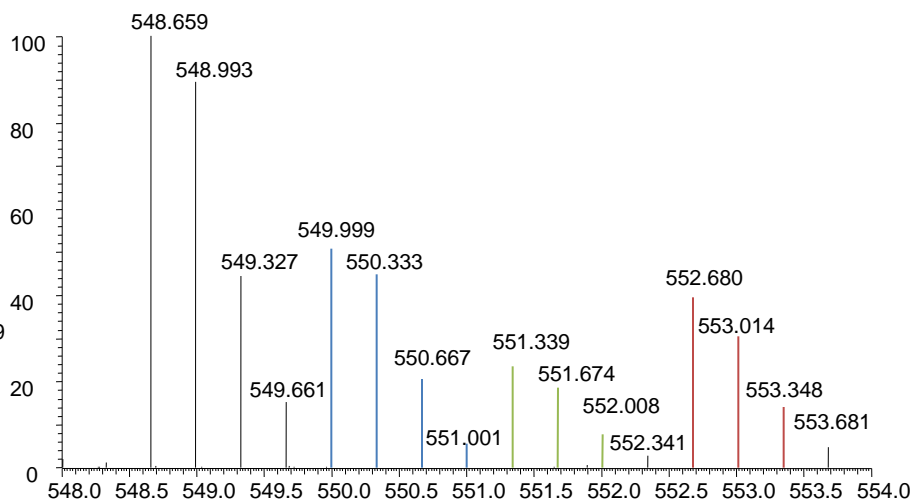

m/z

Day 0

H3K27me1K36me2

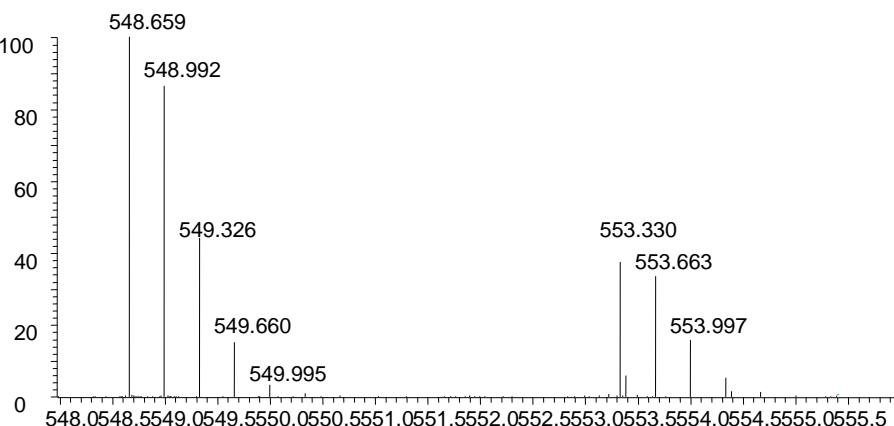

H3K27me3K36me1

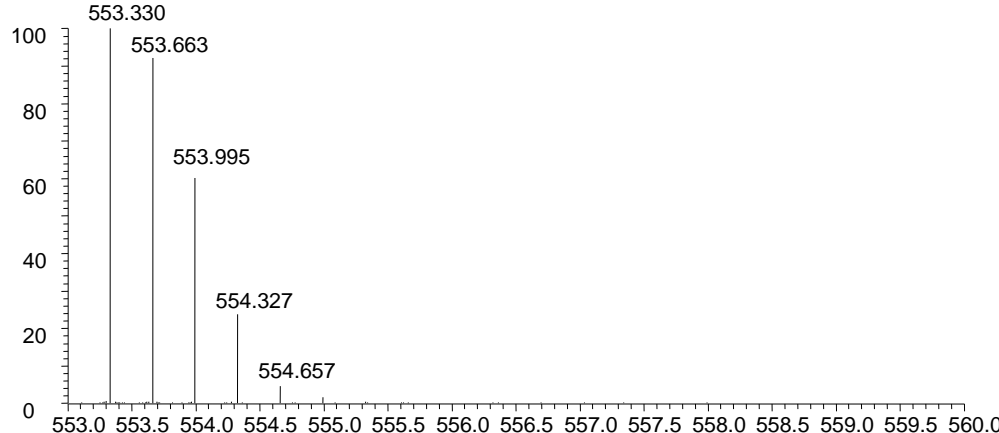

Day 1

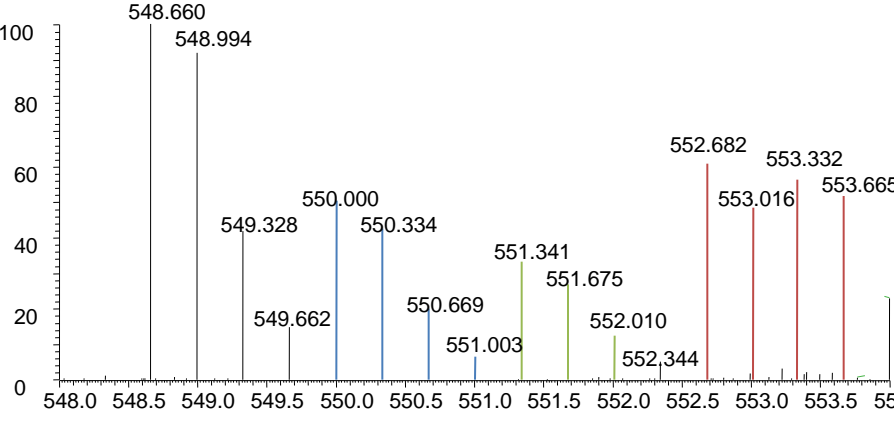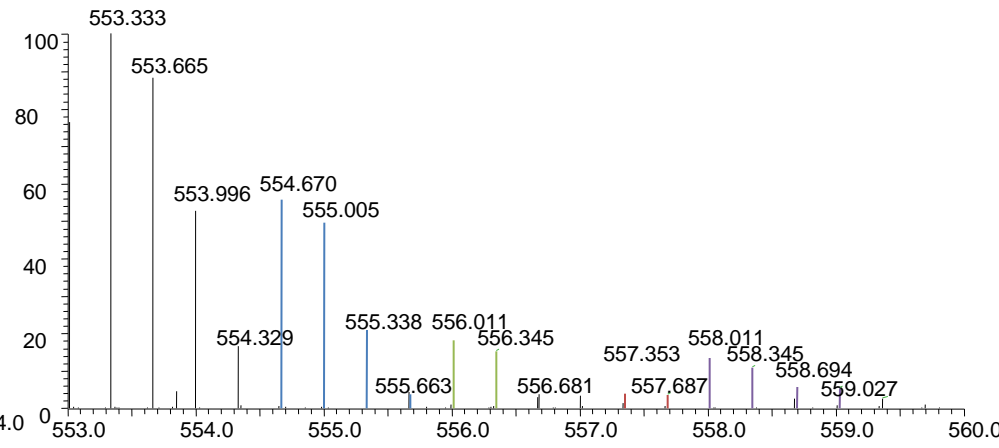

m/z

### H3K27me1K36me3

Day 0

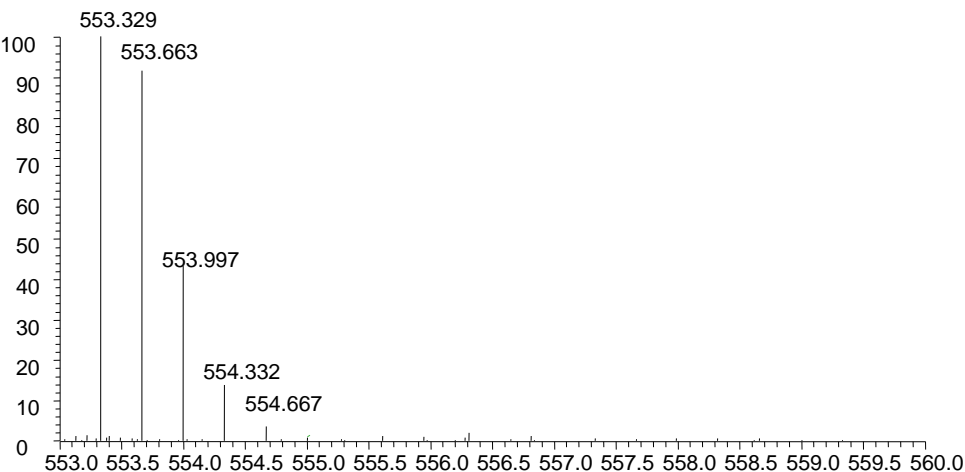

### H3K27me2K36me2

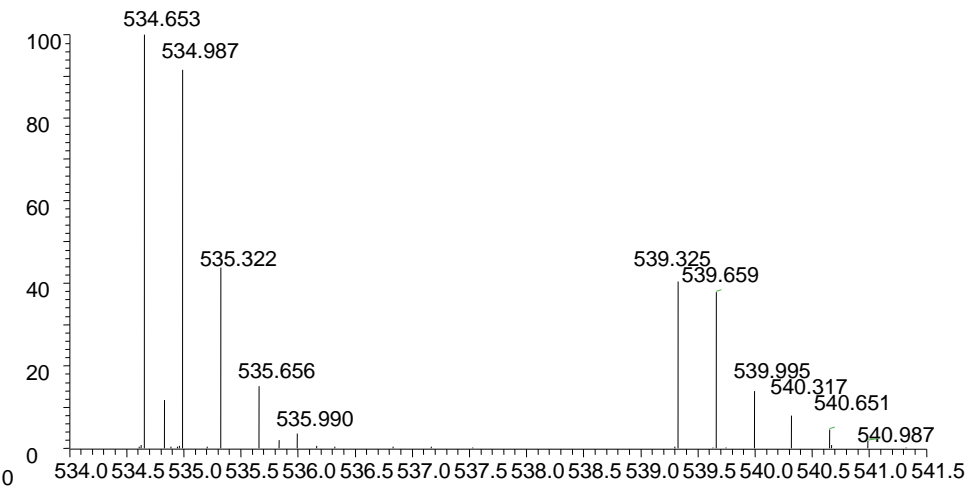

Day 1

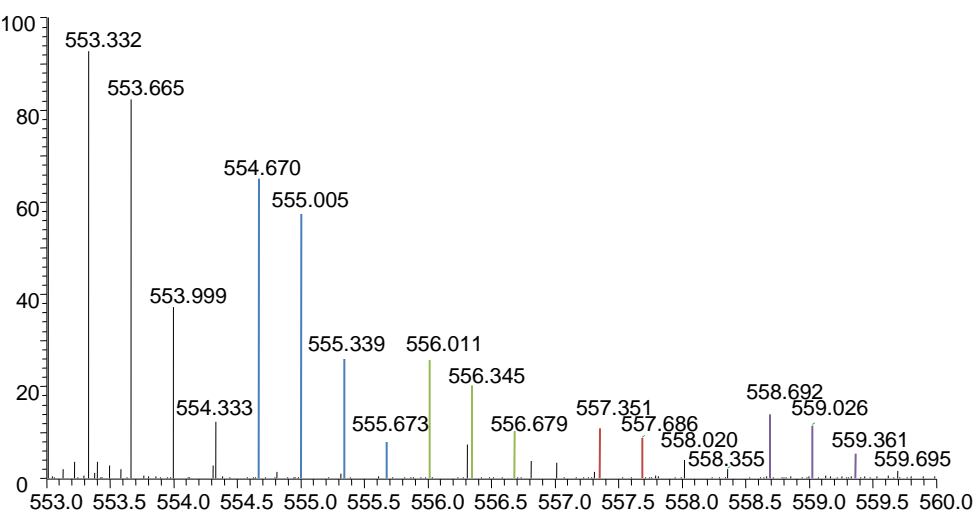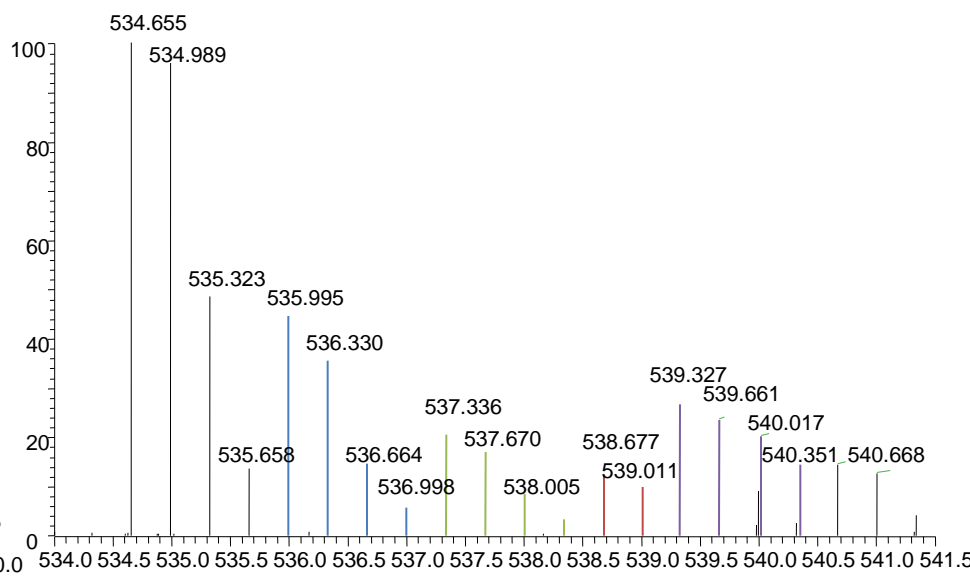

m/z

Day 0

H3K27me3K36me2

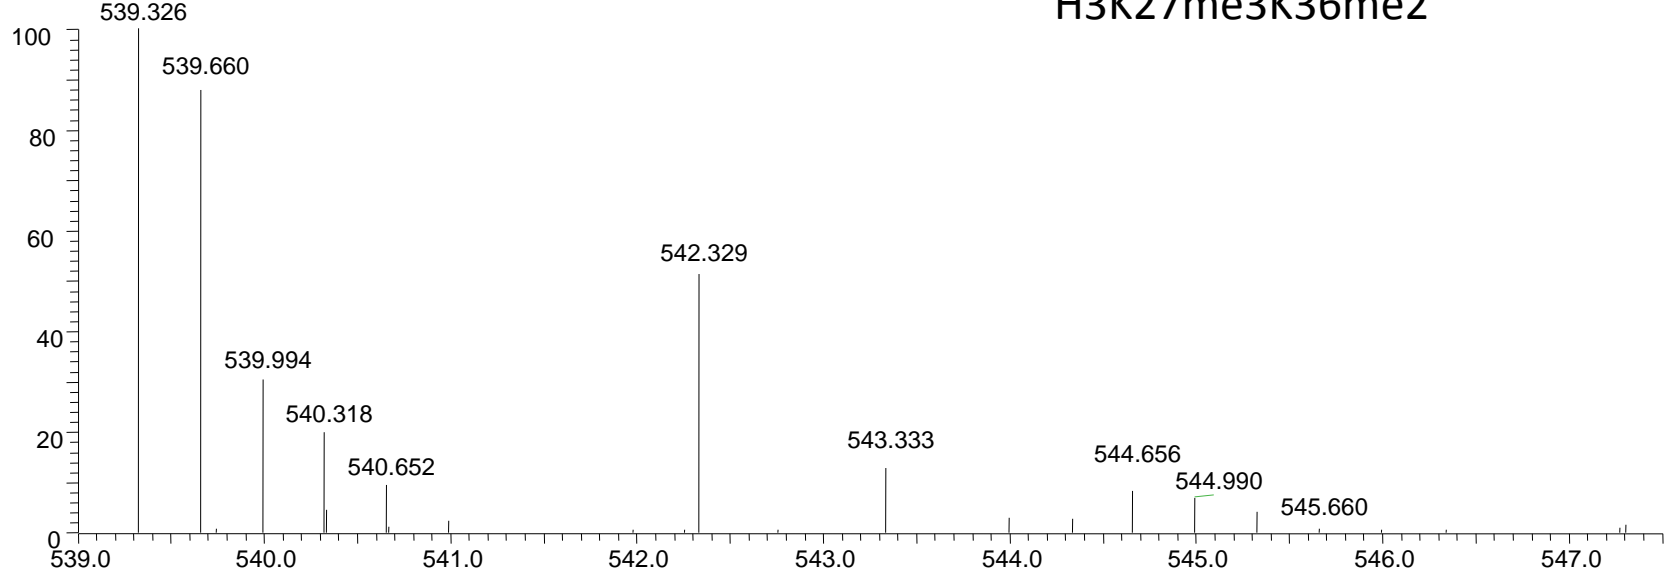

Day 1

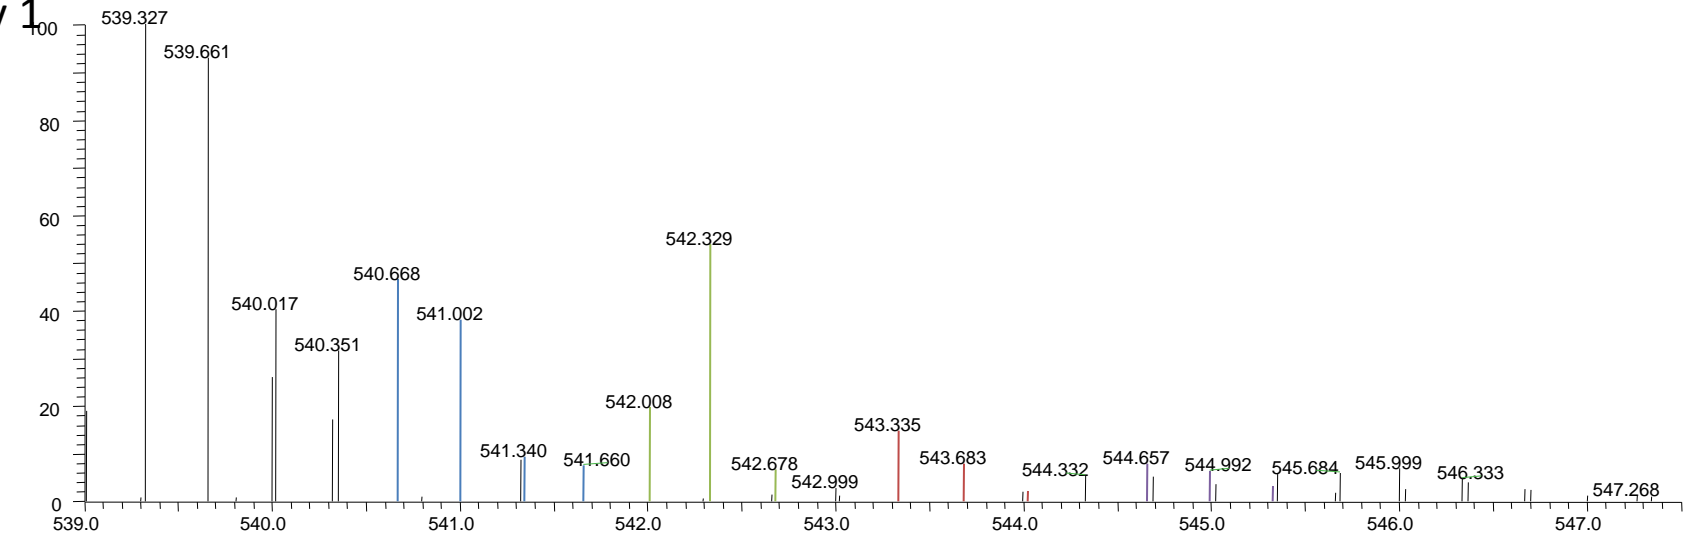

m/z

### H3K79me1

### H3K79me2

Day 0

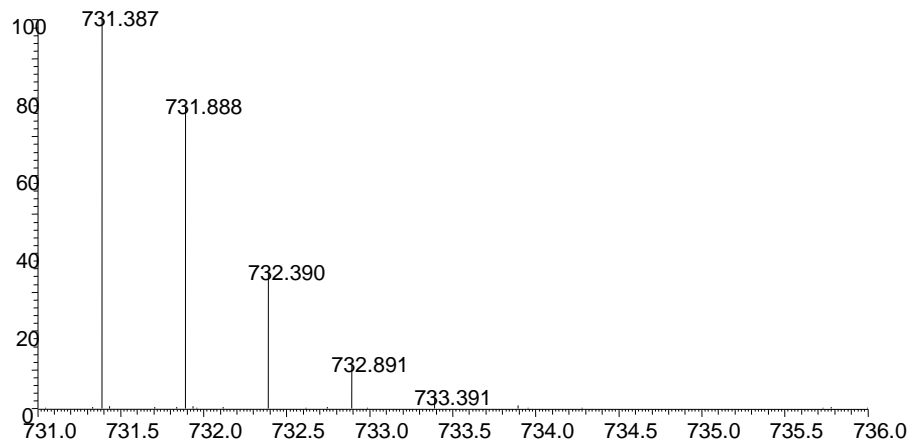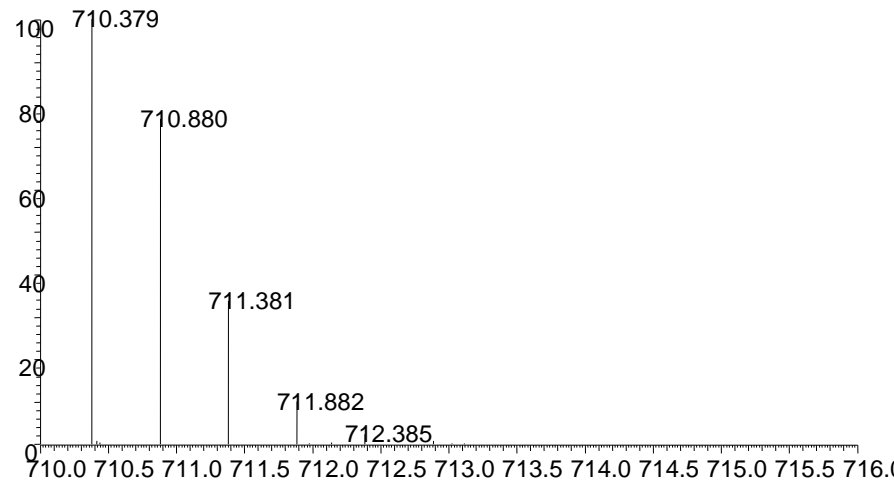

Day 1

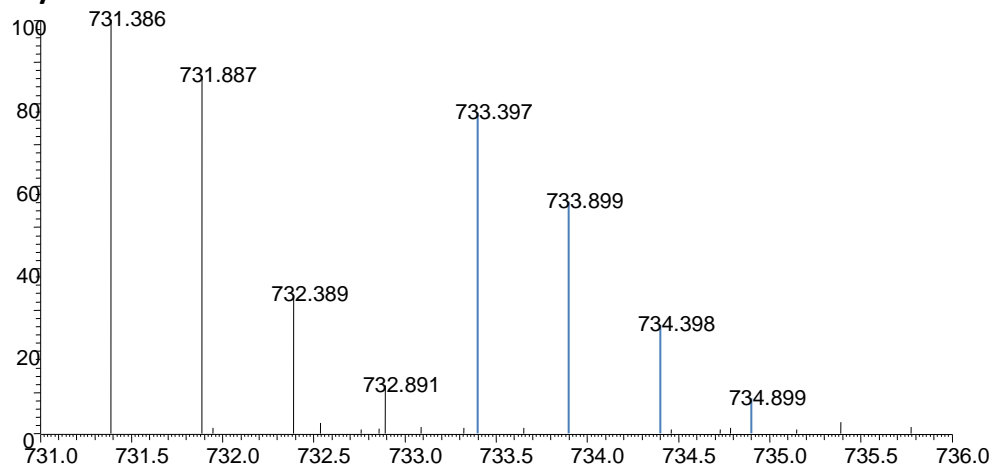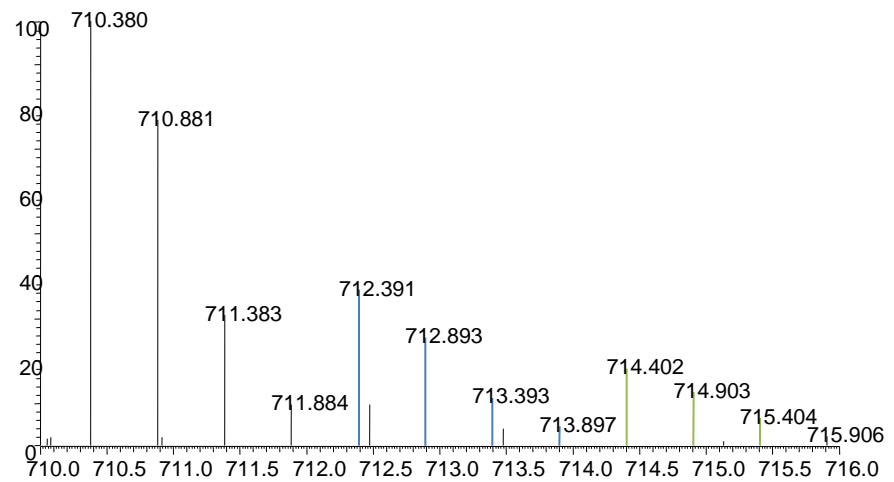

m/z



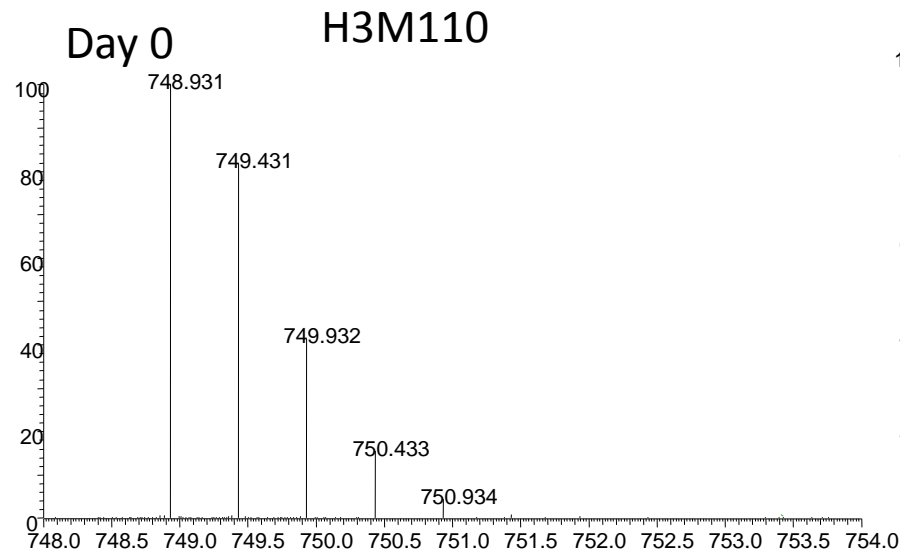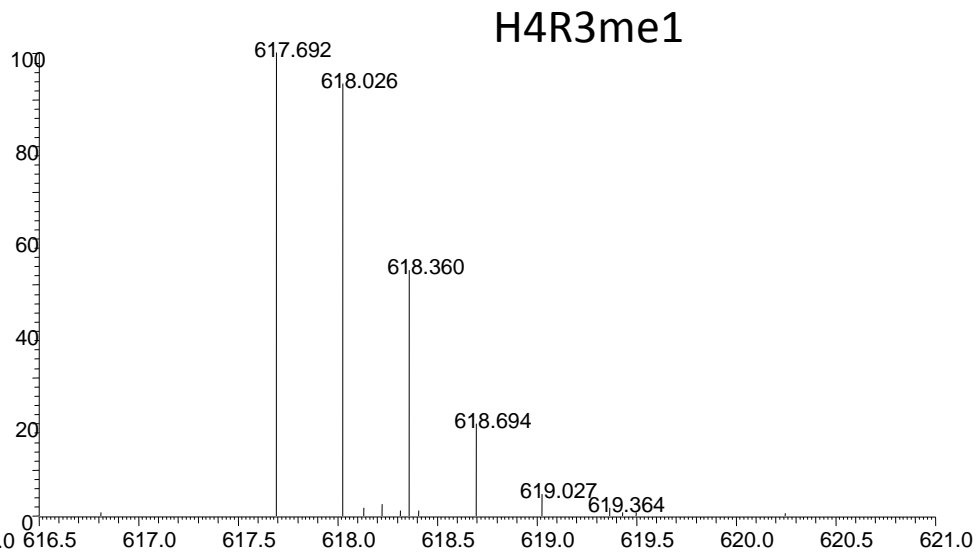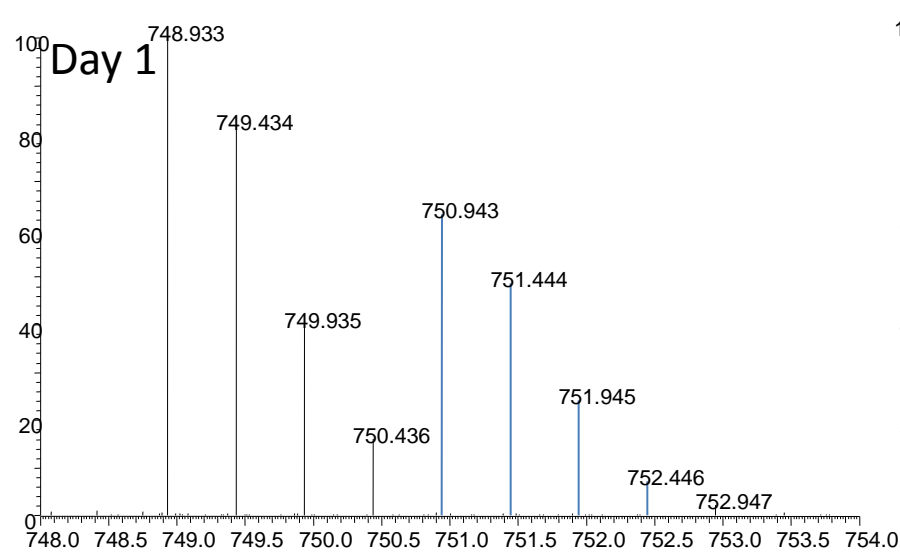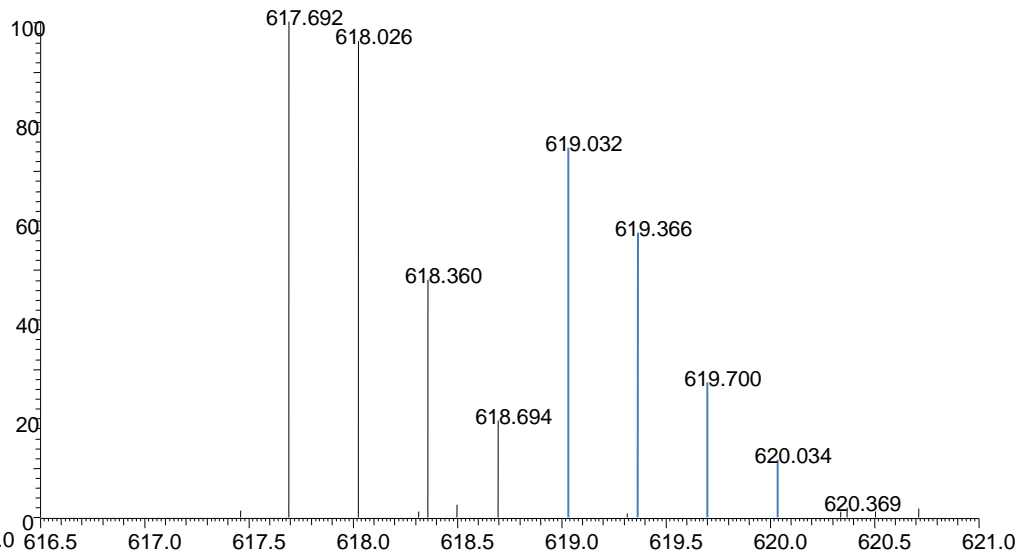

m/z

Day 0 H4K20me1

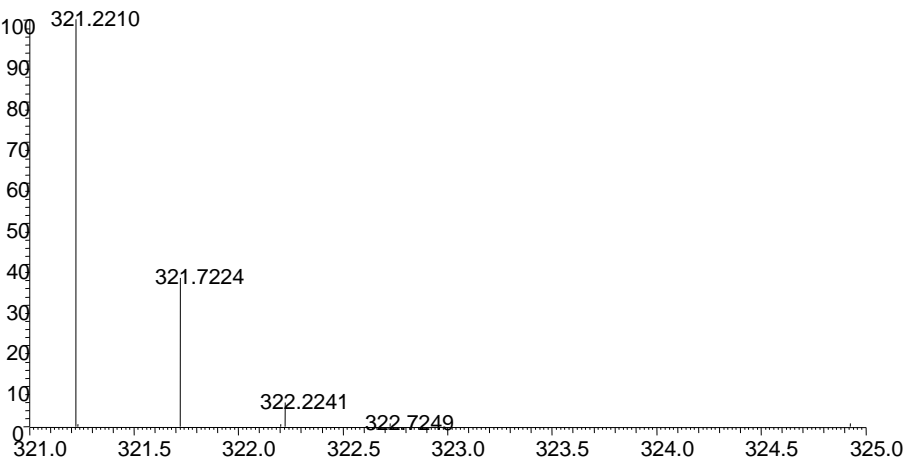

H4K20me2

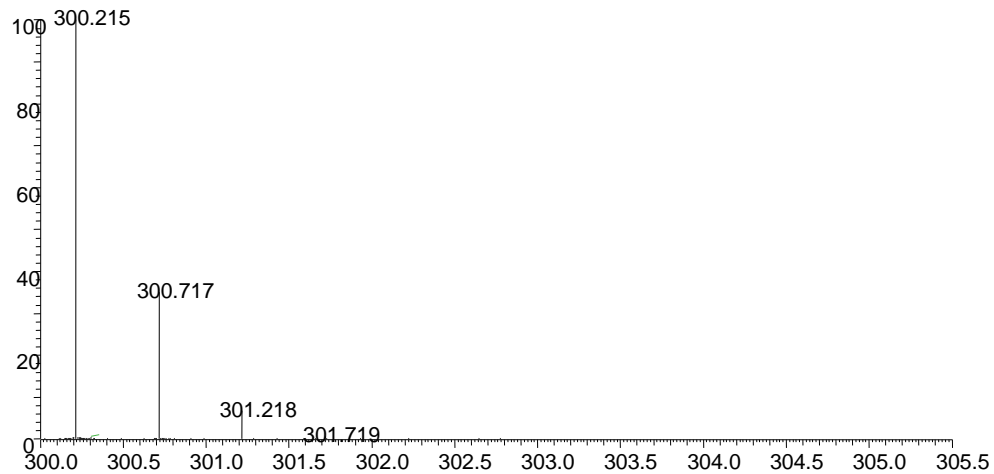

Day 1

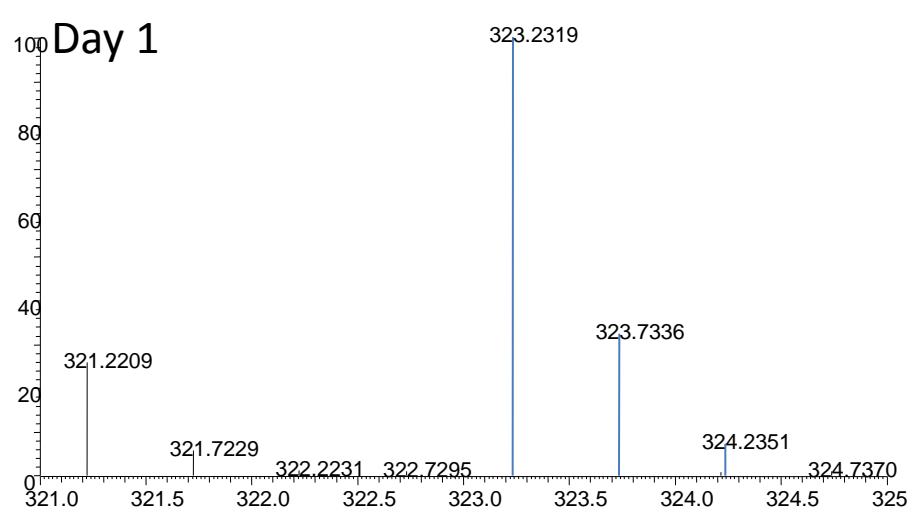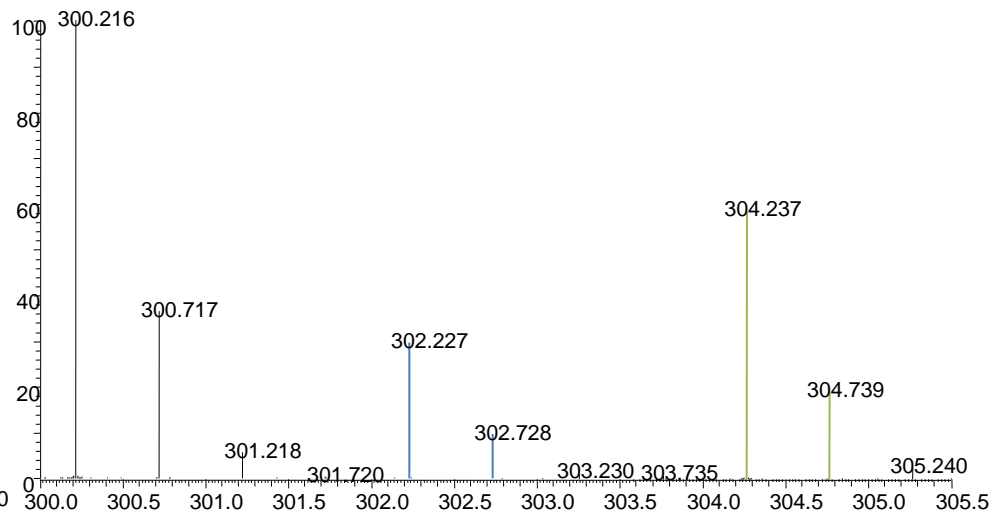

m/z

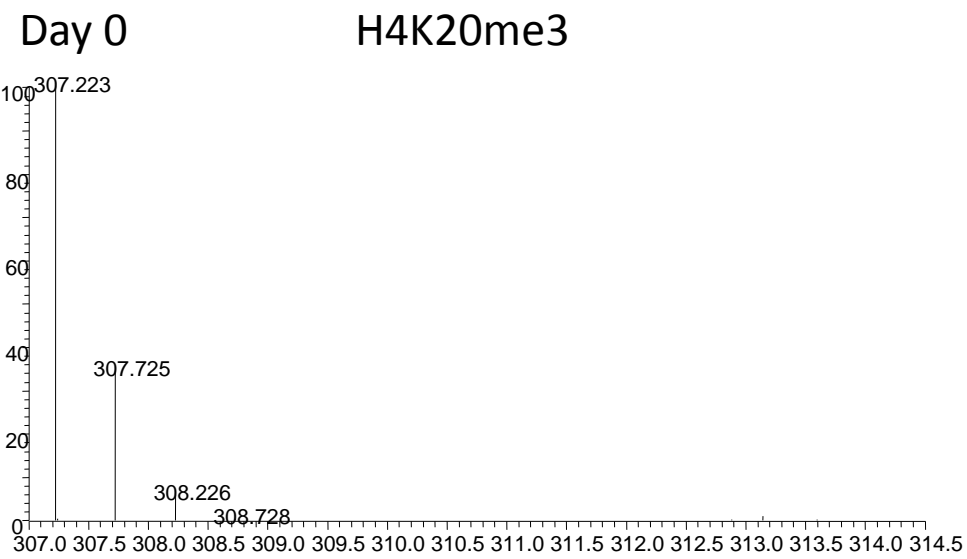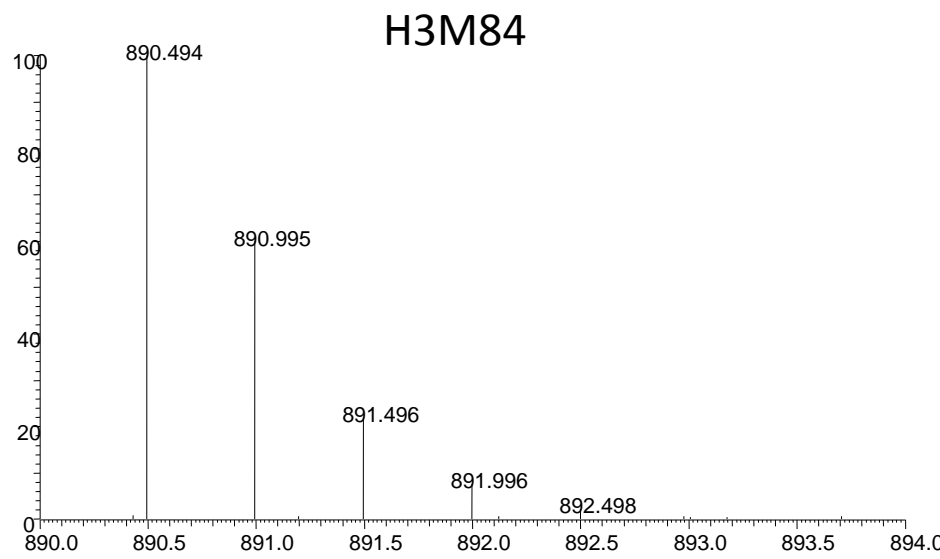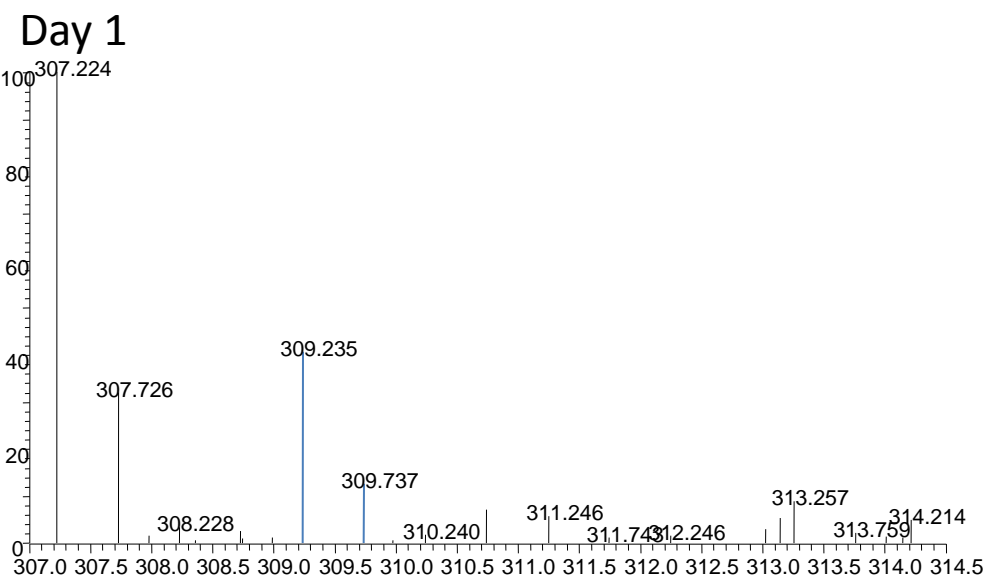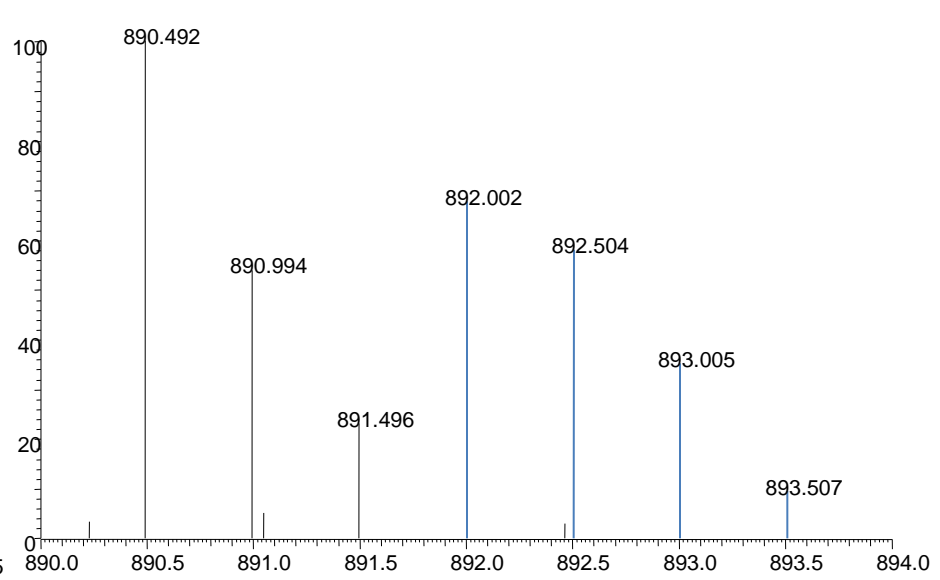

m/z

Day 0

H1.4K25me1

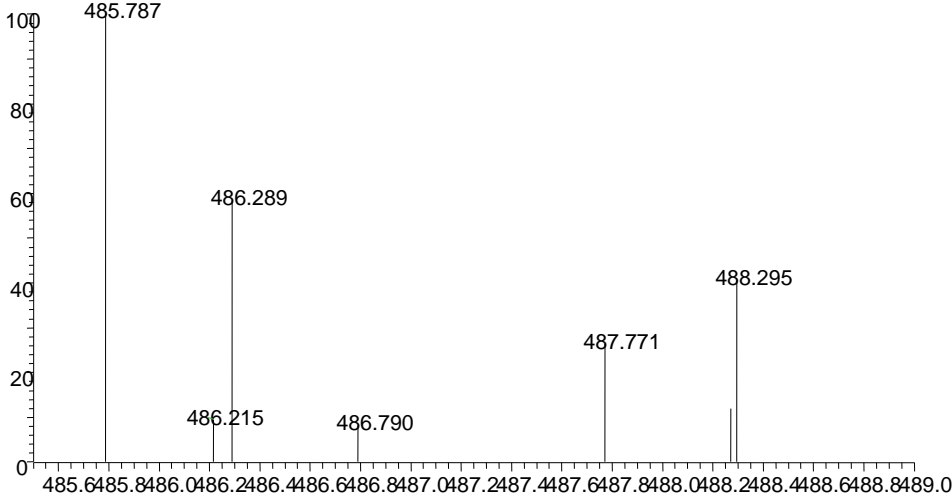

H1.4K33

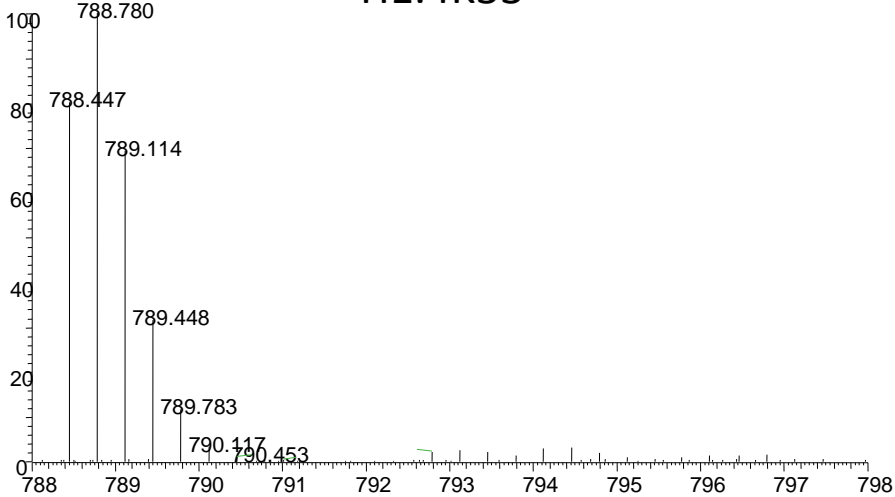

Day 1

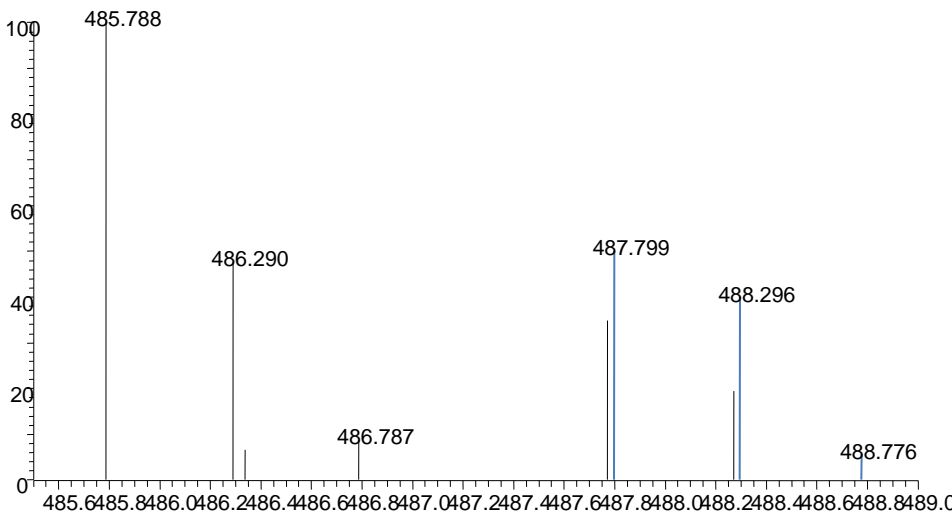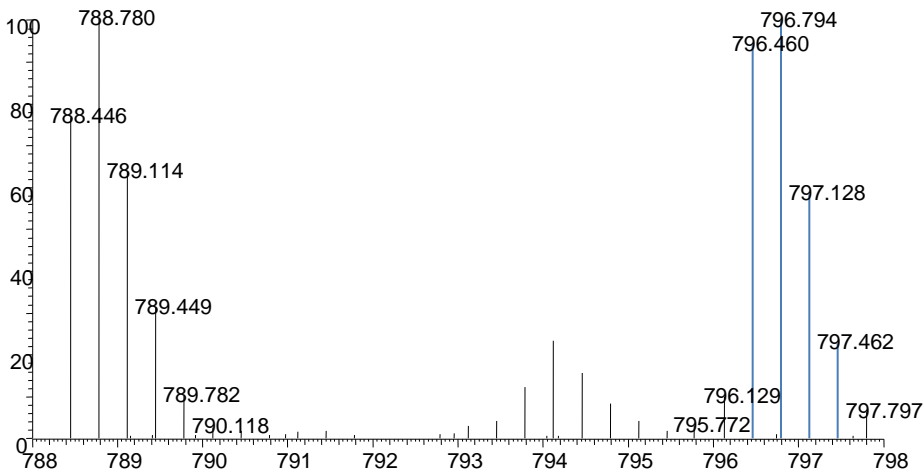

m/z

Day 0

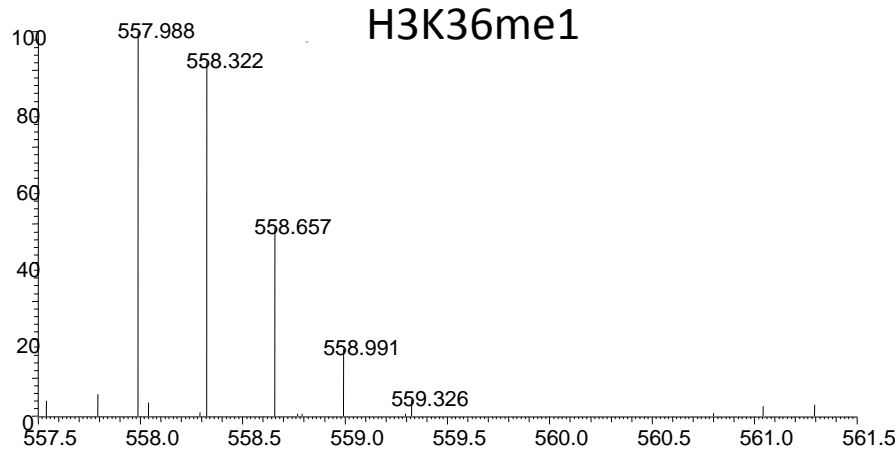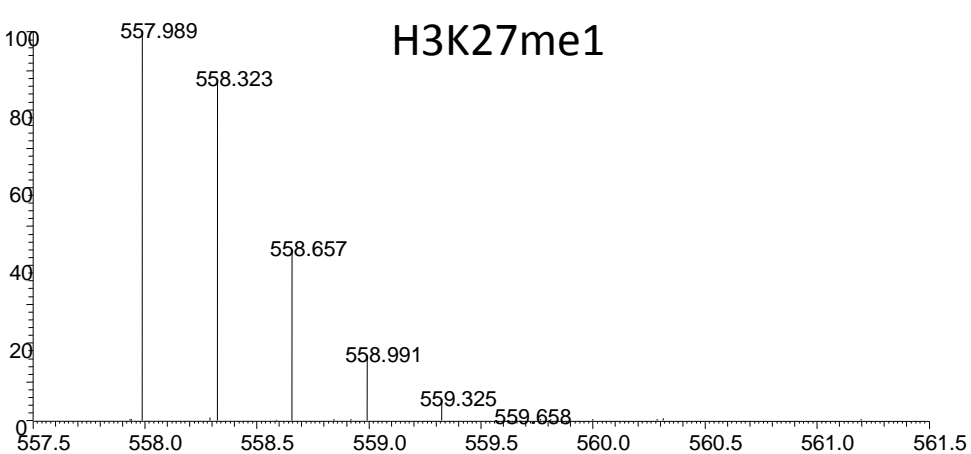

Day 1

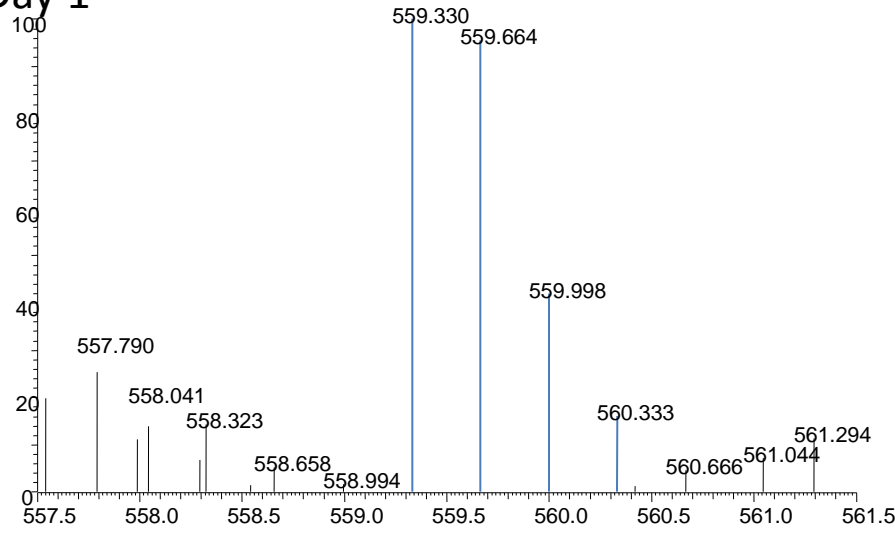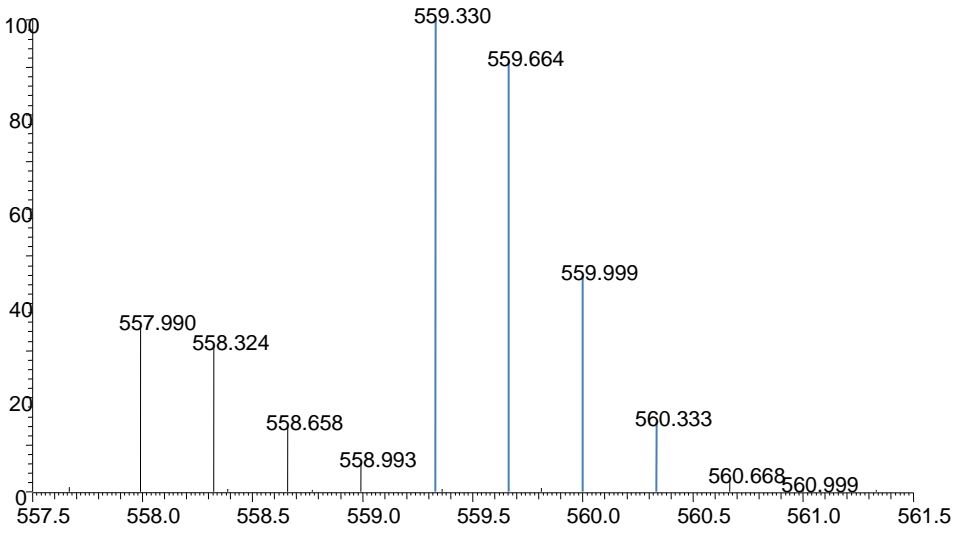

m/z

Day 0

H3K27me2

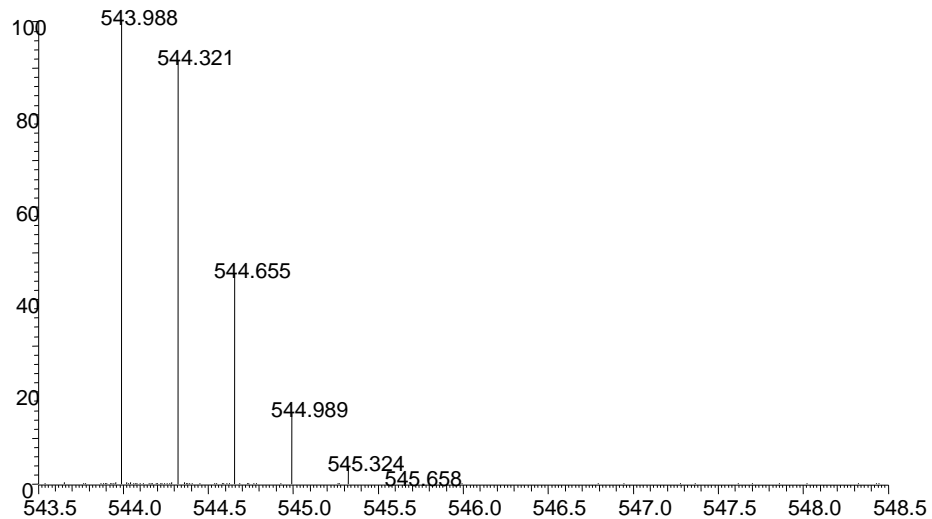

H3K36me2

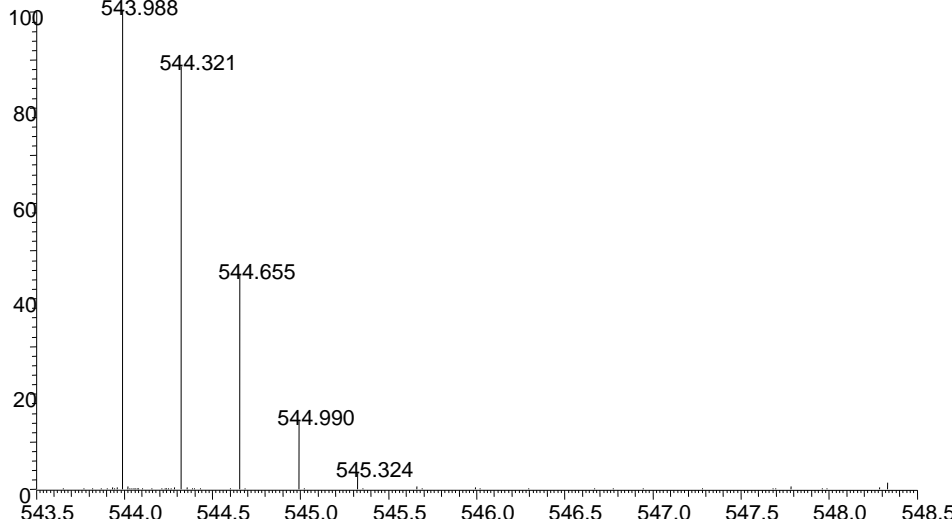

Day 1

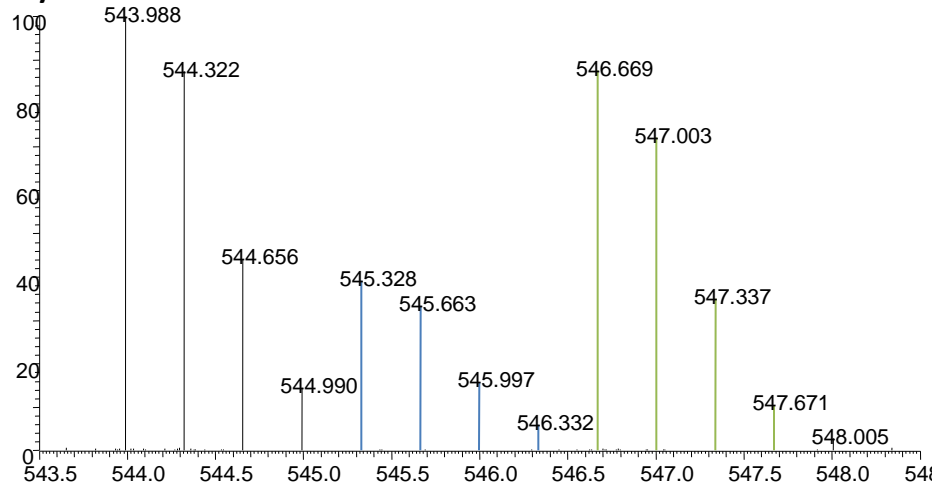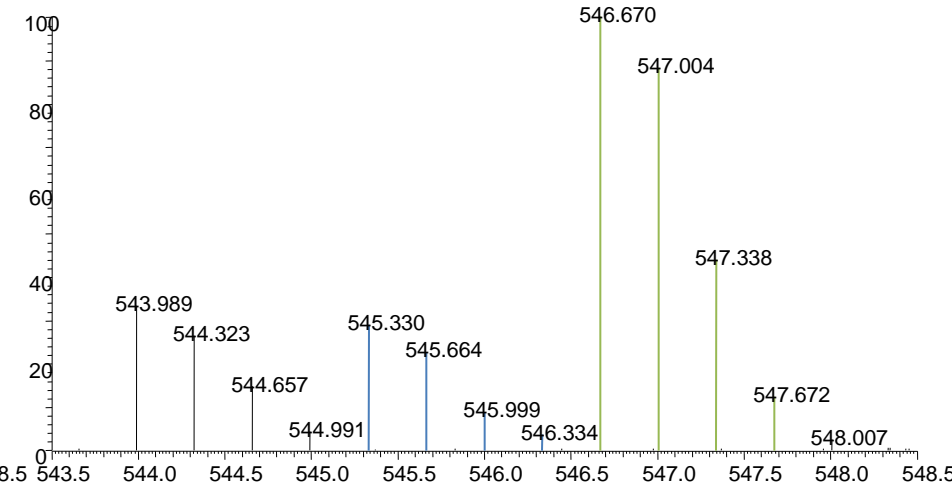

m/z

# H3K27me1K36me1

Day 0

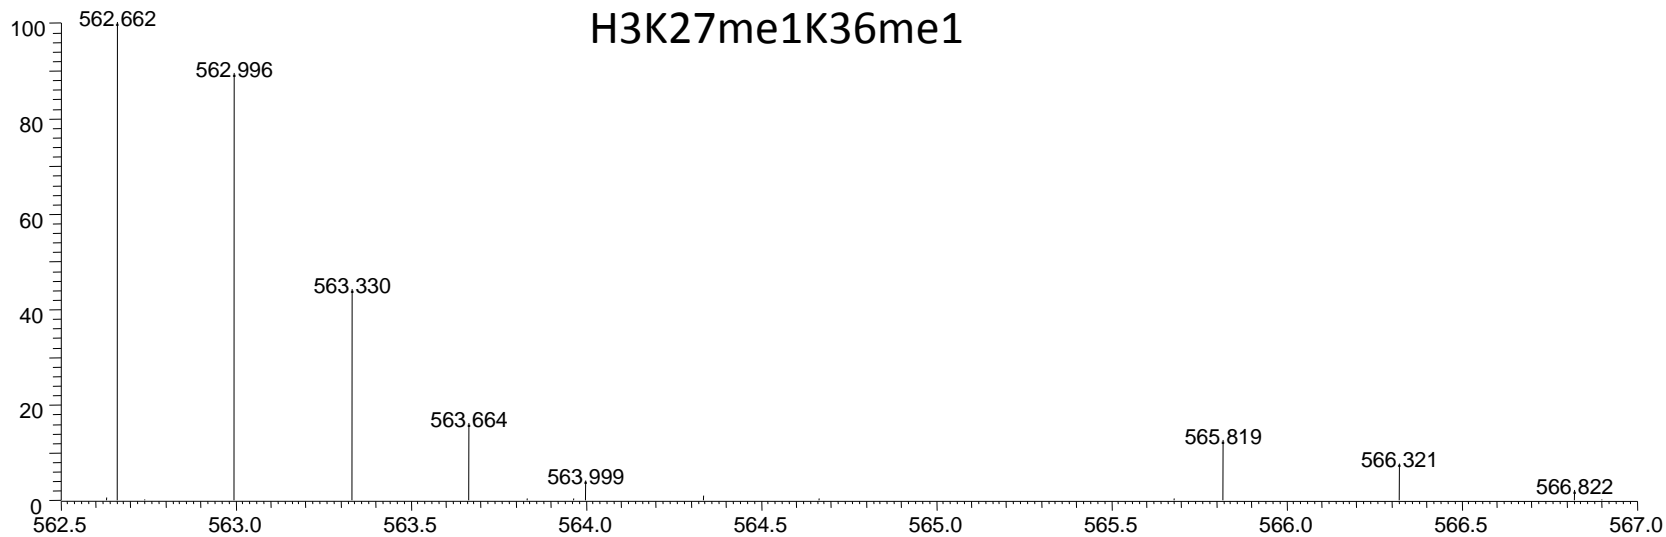

Day 1

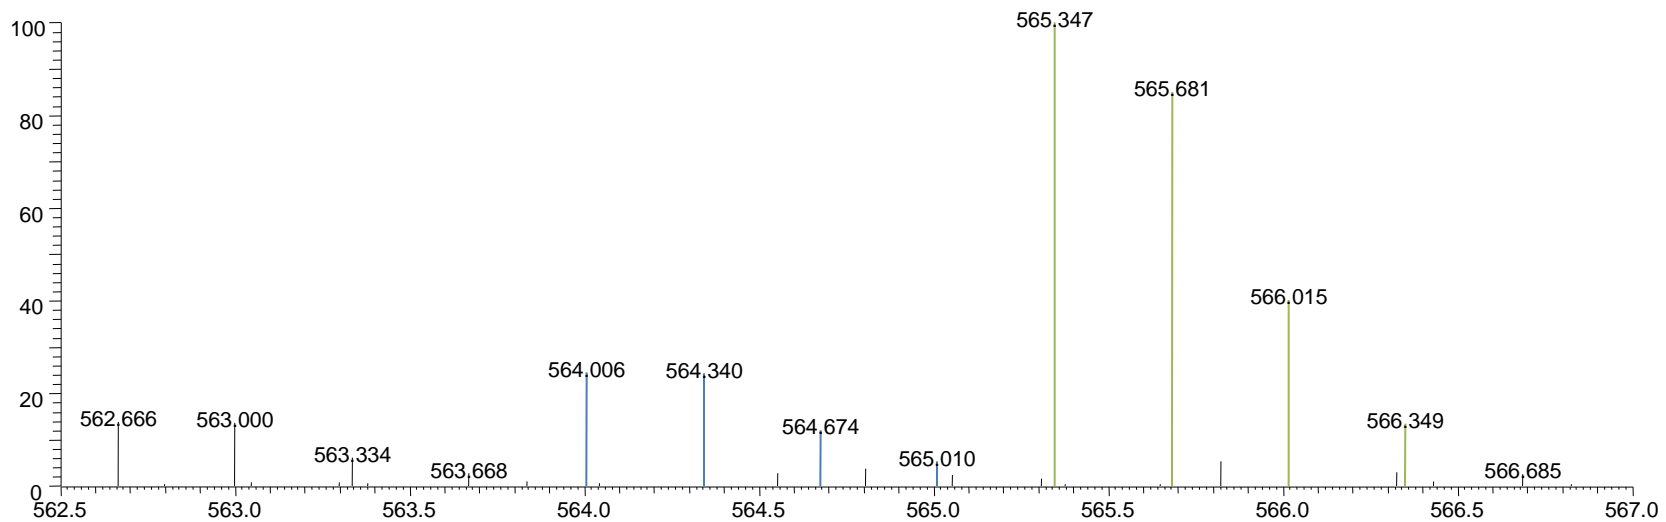

m/z

# Supplemental Fig. 4

SUPPLEMENTAL FIG 4. Relative distribution of H3K18me1, H4R3me1, H3K79me1 and me2, H3K4me1, H3K27me1, me2, and me3 and H1.4K25me1 compared to the respective overall histone turnover during the course of the pulse labeling. Markers represent averages from two technical replicates, and vertical bars denote standard error.

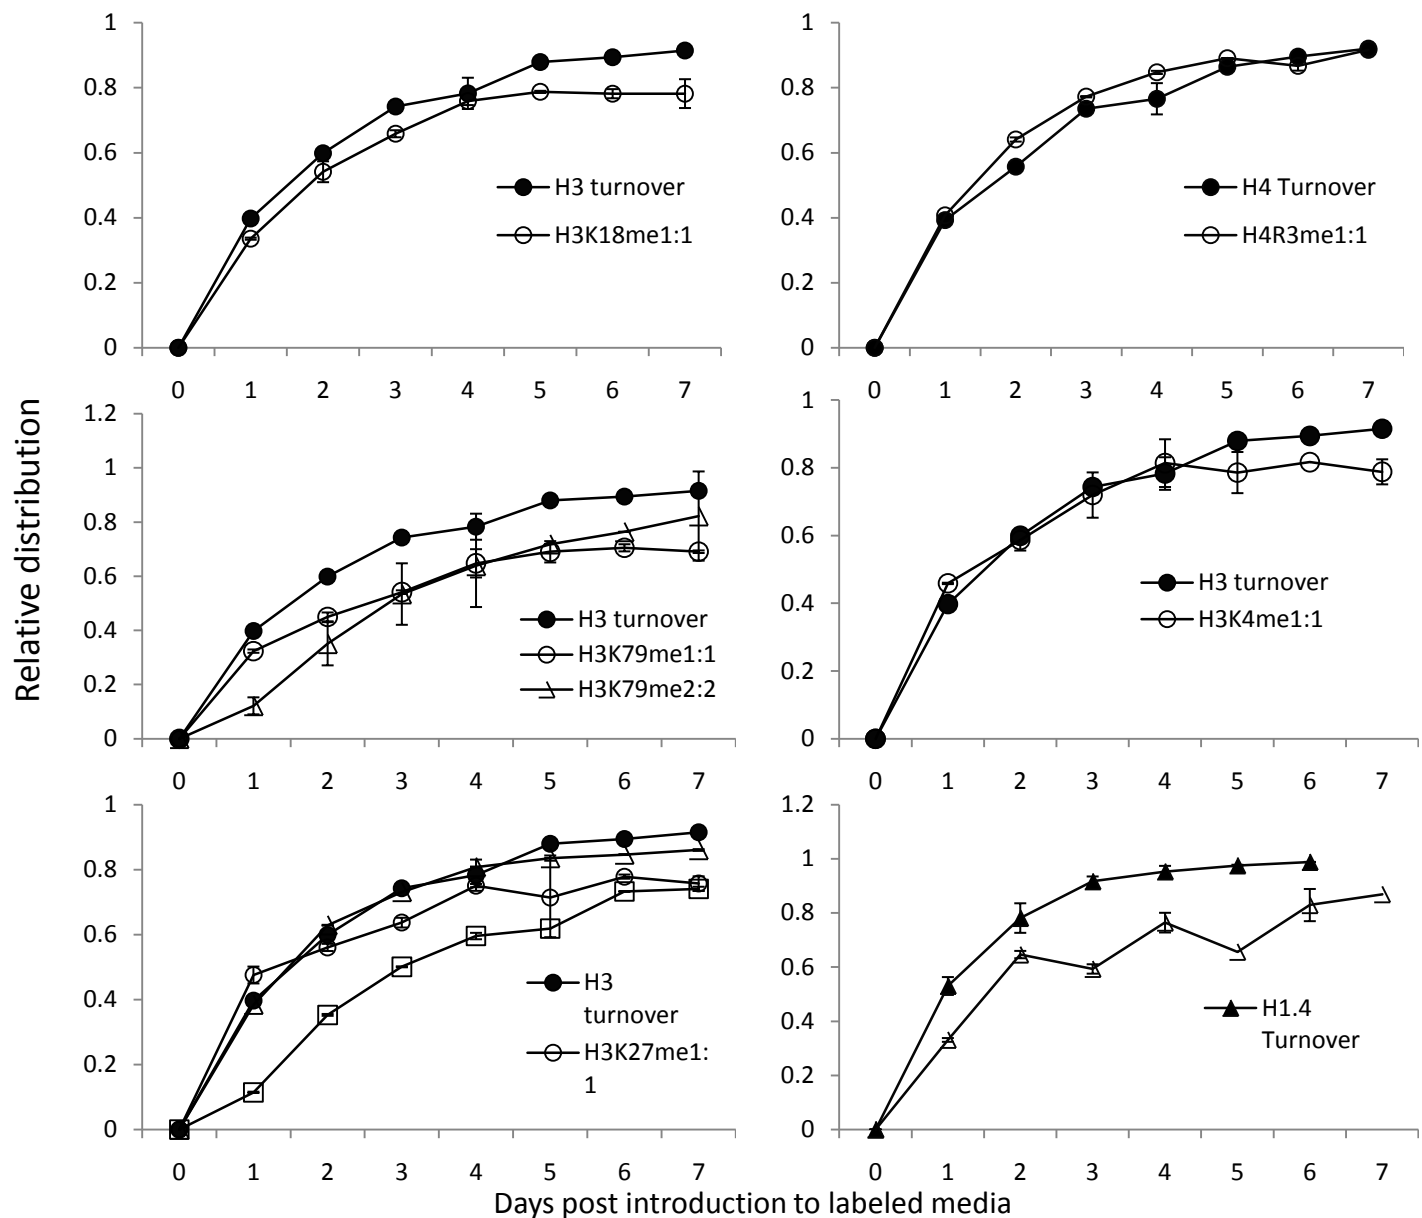



# Supplemental Fig. 5

SUPPLEMENTAL FIGURE 5. Effect of acetylation and methylation of other residues on half-life. The average half-lives of the (A) H3K9 fully labeled peptides depending on the K14 acetylation state and of the (B) H3K27 and H3K36 fully labeled peptides depending on the methylation state of K36 and K27 respectively. Vertical bars denote standard error.

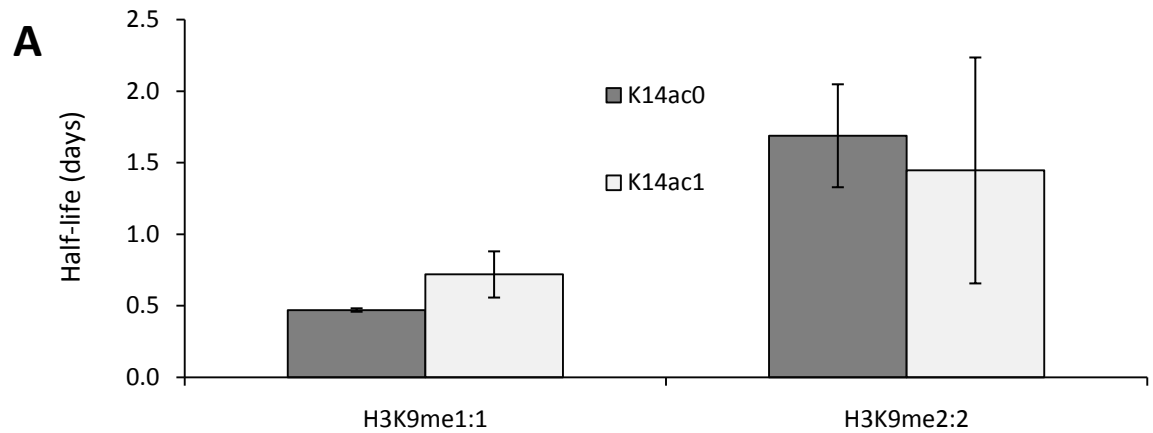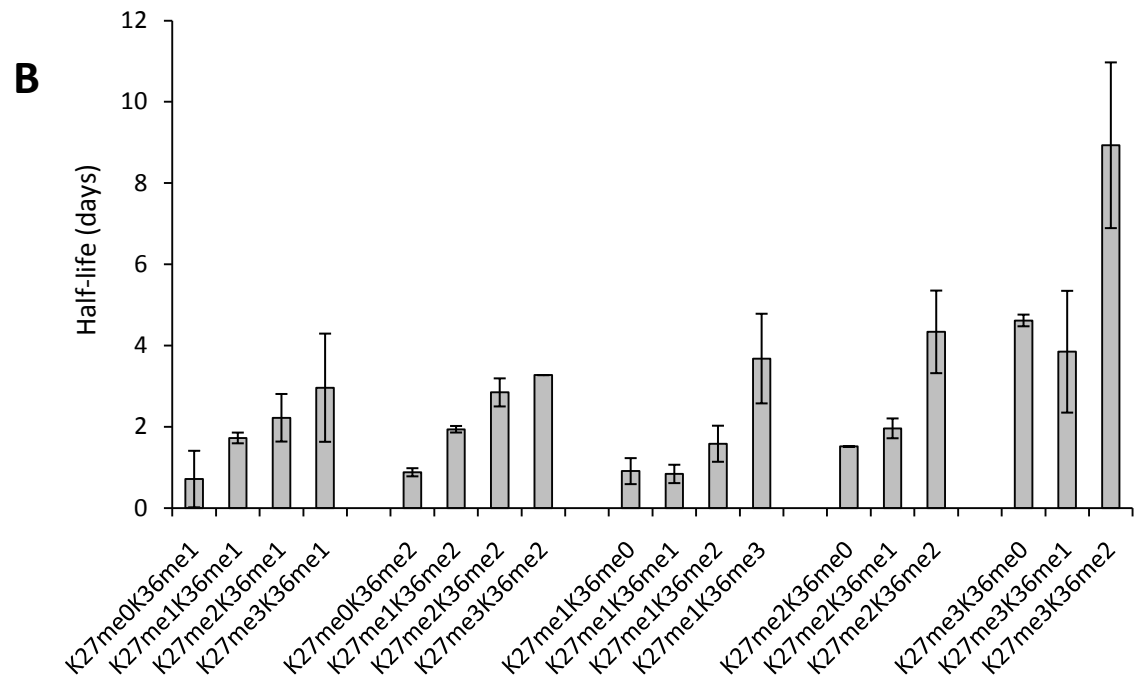

Supplement: supp_M109.063784_jbc.M109.063784-1.pdf [file supp_M109.063784_jbc.M109.063784-1.pdf]
