# Supplementary material
Source: PubMed Central journal article supplement (PMC2823435)
Supplement: supp_M109.063784_jbc.M109.063784-2.pdf [file supp_M109.063784_jbc.M109.063784-2.pdf]

**SUPPLEMENTAL TABLE 1.** The post-translationally modified histone peptides analyzed in this study, with the simplified notation, as identified by both accurate mass and MS/MS.

| Peptide (sequence; charge) <sup>a</sup>                                                                | Simplified notation | Theor.(m/z) | Obs.(m/z) |
|--------------------------------------------------------------------------------------------------------|---------------------|-------------|-----------|
| <b>Histone H1.4</b>                                                                                    |                     |             |           |
| <i>25-32 fragment</i>                                                                                  |                     |             |           |
| <sub>pr</sub> K <sub>pr</sub> SAGAAK <sub>pr</sub> R; +2                                               | H1.4K25me0:0        | 478.780     | 478.779   |
| <sub>pr</sub> K <sub>pr,me1:0</sub> SAGAAK <sub>pr</sub> R; +2                                         | H1.4K25me1:0        | 485.788     | 485.787   |
| <sub>pr</sub> K <sub>pr,me1:1</sub> SAGAAK <sub>pr</sub> R; +2                                         | H1.4K25me1:1        | 487.798     | 487.798   |
| <i>33-53 fragment</i>                                                                                  |                     |             |           |
| <sub>pr</sub> K <sub>0,pr</sub> ASGPPVSELITK <sub>0,pr</sub> AVAASK <sub>0,pr</sub> ER; +3             | H1.4K33lys3:0       | 788.447     | 788.446   |
| <sub>pr</sub> K <sub>1,pr</sub> ASGPPVSELITK <sub>1,pr</sub> AVAASK <sub>1,pr</sub> ER; +3             | H1.4K33lys3:3       | 796.455     | 796.457   |
| <b>Histone H3</b>                                                                                      |                     |             |           |
| <i>3-8 fragment</i>                                                                                    |                     |             |           |
| <sub>pr</sub> TK <sub>pr</sub> QTAR; +2                                                                | H3K4me0:0           | 408.733     | 408.733   |
| <sub>pr</sub> TK <sub>pr,me1:0</sub> QTAR; +2                                                          | H3K4me1:0           | 415.741     | 415.742   |
| <sub>pr</sub> TK <sub>pr,me1:1</sub> QTAR; +2                                                          | H3K4me1:1           | 417.751     | 417.751   |
| <i>9-17 fragment</i>                                                                                   |                     |             |           |
| <sub>pr</sub> K <sub>pr</sub> STGGK <sub>pr</sub> APR; +2                                              | H3K9me0:0           | 535.304     | 535.306   |
| <sub>pr</sub> K <sub>pr,me1:0</sub> STGGK <sub>pr</sub> APR; +2                                        | H3K9me1:0           | 542.312     | 542.313   |
| <sub>pr</sub> K <sub>pr,me1:1</sub> STGGK <sub>pr</sub> APR; +2                                        | H3K9me1:1           | 544.322     | 544.323   |
| <sub>pr</sub> K <sub>me2:0</sub> STGGK <sub>pr</sub> APR; +2                                           | H3K9me2:0           | 521.307     | 521.307   |
| <sub>pr</sub> K <sub>me2:1</sub> STGGK <sub>pr</sub> APR; +2                                           | H3K9me2:1           | 523.317     | 523.318   |
| <sub>pr</sub> K <sub>me2:2</sub> STGGK <sub>pr</sub> APR; +2                                           | H3K9me2:2           | 525.327     | 525.328   |
| <sub>pr</sub> K <sub>me3:0</sub> STGGK <sub>pr</sub> APR; +2                                           | H3K9me3:0           | 528.315     | 528.313   |
| <sub>pr</sub> K <sub>me3:1</sub> STGGK <sub>pr</sub> APR; +2                                           | H3K9me3:1           | 530.325     | 530.324   |
| <sub>pr</sub> K <sub>me3:2</sub> STGGK <sub>pr</sub> APR; +2                                           | H3K9me3:2           | 532.335     | 532.336   |
| <sub>pr</sub> K <sub>me3:3</sub> STGGK <sub>pr</sub> APR; +2                                           | H3K9me3:3           | 534.345     | 534.347   |
| <sub>pr</sub> K <sub>pr,me1:0</sub> STGGK <sub>ac</sub> APR; +2                                        | H3K9me1:0K14ac1     | 535.304     | 535.305   |
| <sub>pr</sub> K <sub>pr,me1:1</sub> STGGK <sub>ac</sub> APR; +2                                        | H3K9me1:1K14ac1     | 537.314     | 537.316   |
| <sub>pr</sub> K <sub>me2:0</sub> STGGK <sub>ac</sub> APR; +2                                           | H3K9me2:0K14ac1     | 514.299     | 514.299   |
| <sub>pr</sub> K <sub>me2:1</sub> STGGK <sub>ac</sub> APR; +2                                           | H3K9me2:1K14ac1     | 516.309     | 516.310   |
| <sub>pr</sub> K <sub>me2:2</sub> STGGK <sub>ac</sub> APR; +2                                           | H3K9me2:2K14ac1     | 518.319     | 518.321   |
| <i>18-26 fragment</i>                                                                                  |                     |             |           |
| <sub>pr</sub> K <sub>pr</sub> QLATK <sub>pr</sub> AAR; +2                                              | H3K18me0:0          | 577.849     | 577.850   |
| <sub>pr</sub> K <sub>pr,me1:0</sub> QLATK <sub>pr</sub> AAR; +2                                        | H3K18me1:0          | 584.857     | 584.858   |
| <sub>pr</sub> K <sub>pr,me1:1</sub> QLATK <sub>pr</sub> AAR; +2                                        | H3K18me1:1          | 586.867     | 586.870   |
| <sub>pr</sub> K <sub>pr</sub> QLATK <sub>ac</sub> AAR; +2                                              | H3K18me0:0K23ac1    | 570.841     | 570.842   |
| <sub>pr</sub> K <sub>ac</sub> QLATK <sub>pr</sub> AAR; +2                                              | H3K18ac1            | 570.841     | 570.842   |
| <sub>pr</sub> K <sub>ac</sub> QLATK <sub>ac</sub> AAR; +2                                              | H3K18ac1K23ac1      | 563.833     | 563.834   |
| <i>27-40 fragment</i>                                                                                  |                     |             |           |
| <sub>pr</sub> K <sub>pr</sub> SAPATGGVK <sub>pr</sub> K <sub>pr</sub> PHR; +3                          | H3K36me0:0          | 553.318     | 553.319   |
| <sub>pr</sub> K <sub>pr</sub> SAPATGGVK <sub>pr,me1:0</sub> K <sub>pr</sub> PHR; +3                    | H3K36me1:0          | 557.990     | 557.990   |
| <sub>pr</sub> K <sub>pr</sub> SAPATGGVK <sub>pr,me1:1</sub> K <sub>pr</sub> PHR; +3                    | H3K36me1:1          | 559.330     | 559.329   |
| <sub>pr</sub> K <sub>pr,me1:0</sub> SAPATGGVK <sub>pr</sub> K <sub>pr</sub> PHR; +3                    | H3K27me1:0          | 557.990     | 557.990   |
| <sub>pr</sub> K <sub>pr,me1:1</sub> SAPATGGVK <sub>pr</sub> K <sub>pr</sub> PHR; +3                    | H3K27me1:1          | 559.330     | 559.331   |
| <sub>pr</sub> K <sub>me2:0</sub> SAPATGGVK <sub>pr</sub> K <sub>pr</sub> PHR; +3                       | H3K27me2:0          | 543.987     | 543.988   |
| <sub>pr</sub> K <sub>me2:1</sub> SAPATGGVK <sub>pr</sub> K <sub>pr</sub> PHR; +3                       | H3K27me2:1          | 545.327     | 545.328   |
| <sub>pr</sub> K <sub>me2:2</sub> SAPATGGVK <sub>pr</sub> K <sub>pr</sub> PHR; +3                       | H3K27me2:2          | 546.667     | 546.668   |
| <sub>pr</sub> K <sub>pr</sub> SAPATGGVK <sub>me2:0</sub> K <sub>pr</sub> PHR; +3                       | H3K36me2:0          | 543.987     | 543.987   |
| <sub>pr</sub> K <sub>pr</sub> SAPATGGVK <sub>me2:1</sub> K <sub>pr</sub> PHR; +3                       | H3K36me2:1          | 545.327     | 545.327   |
| <sub>pr</sub> K <sub>pr</sub> SAPATGGVK <sub>me2:2</sub> K <sub>pr</sub> PHR; +3                       | H3K36me2:2          | 546.667     | 546.668   |
| <sub>pr</sub> K <sub>pr,me1:0</sub> SAPATGGVK <sub>pr,me1:0</sub> K <sub>pr</sub> PHR; +3              | H3K27me1:0K36me1:0  | 562.662     | 562.662   |
| <sub>pr</sub> K <sub>pr,me1:1</sub> SAPATGGVK <sub>pr,me1:0</sub> K <sub>pr</sub> PHR; +3 <sup>b</sup> | H3K27me1:1K36me1:0  |             |           |

|                                                                                             |                    |         |         |
|---------------------------------------------------------------------------------------------|--------------------|---------|---------|
| dr K <sub>pr,me1:0</sub> SAPATGGVK <sub>pr,me1:1</sub> K <sub>pr</sub> PHR; +3 <sup>b</sup> | H3K27me1:0K36me1:1 | 564.002 | 564.004 |
| dr K <sub>pr,me1:1</sub> SAPATGGVK <sub>pr,me1:1</sub> K <sub>pr</sub> PHR; +3              | H3K27me1:1K36me1:1 | 565.342 | 565.344 |
| dr K <sub>me3:0</sub> SAPATGGVK <sub>pr</sub> K <sub>pr</sub> PHR; +3                       | H3K27me3:0         | 548.658 | 548.658 |
| dr K <sub>me2:0</sub> SAPATGGVK <sub>pr,me1:0</sub> K <sub>pr</sub> PHR; +3                 | H3K27me2:0K36me1:0 | 548.658 | 548.660 |
| dr K <sub>pr,me1:0</sub> SAPATGGVK <sub>me2:0</sub> K <sub>pr</sub> PHR; +3                 | H3K27me1:0K36me2:0 | 548.658 | 548.660 |
| dr K <sub>me3:1</sub> SAPATGGVK <sub>pr</sub> K <sub>pr</sub> PHR; +3                       | H3K27me3:1         | 549.999 | 549.997 |
| pr K <sub>me2:1</sub> SAPATGGVK <sub>pr,me1:0</sub> K <sub>pr</sub> PHR; +3 <sup>b</sup>    | H3K27me2:1K36me1:0 |         |         |
| pr K <sub>me2:0</sub> SAPATGGVK <sub>pr,me1:1</sub> K <sub>pr</sub> PHR; +3 <sup>b</sup>    | H3K27me2:0K36me1:1 | 549.999 | 549.999 |
| pr K <sub>pr,me1:1</sub> SAPATGGVK <sub>me2:0</sub> K <sub>pr</sub> PHR; +3 <sup>b</sup>    | H3K27me1:1K36me2:0 |         |         |
| pr K <sub>pr,me1:0</sub> SAPATGGVK <sub>me2:1</sub> K <sub>pr</sub> PHR; +3 <sup>b</sup>    | H3K27me1:0K36me2:1 | 549.999 | 549.998 |
| pr K <sub>me3:2</sub> SAPATGGVK <sub>pr</sub> K <sub>pr</sub> PHR; +3                       | H3K27me3:2         | 551.339 | 551.339 |
| pr K <sub>me2:2</sub> SAPATGGVK <sub>pr,me1:0</sub> K <sub>pr</sub> PHR; +3 <sup>b</sup>    | H3K27me2:2K36me1:0 |         |         |
| pr K <sub>me2:1</sub> SAPATGGVK <sub>pr,me1:1</sub> K <sub>pr</sub> PHR; +3 <sup>b</sup>    | H3K27me2:1K36me1:1 | 551.339 | 551.339 |
| pr K <sub>pr,me1:1</sub> SAPATGGVK <sub>me2:1</sub> K <sub>pr</sub> PHR; +3 <sup>b</sup>    | H3K27me1:1K36me2:1 |         |         |
| pr K <sub>pr,me1:0</sub> SAPATGGVK <sub>me2:2</sub> K <sub>pr</sub> PHR; +3 <sup>b</sup>    | H3K27me1:0K36me2:2 | 551.339 | 551.339 |
| pr K <sub>me3:3</sub> SAPATGGVK <sub>pr</sub> K <sub>pr</sub> PHR; +3                       | H3K27me3:3         | 552.679 | 552.679 |
| pr K <sub>me2:2</sub> SAPATGGVK <sub>pr,me1:1</sub> K <sub>pr</sub> PHR; +3                 | H3K27me2:2K36me1:1 | 552.679 | 552.680 |
| pr K <sub>pr,me1:1</sub> SAPATGGVK <sub>me2:2</sub> K <sub>pr</sub> PHR; +3                 | H3K27me1:1K36me2:2 | 552.679 | 552.680 |
| pr K <sub>me3:0</sub> SAPATGGVK <sub>pr,me1:0</sub> K <sub>pr</sub> PHR; +3                 | H3K27me3:0K36me1:0 | 553.330 | 553.332 |
| pr K <sub>pr,me1:0</sub> SAPATGGVK <sub>me3:0</sub> K <sub>pr</sub> PHR; +3                 | H3K27me1:0K36me3:0 | 553.330 | 553.331 |
| pr K <sub>me3:1</sub> SAPATGGVK <sub>pr,me1:0</sub> K <sub>pr</sub> PHR; +3 <sup>b</sup>    | H3K27me3:1K36me1:0 |         |         |
| pr K <sub>me3:0</sub> SAPATGGVK <sub>pr,me1:1</sub> K <sub>pr</sub> PHR; +3 <sup>b</sup>    | H3K27me3:0K36me1:1 | 554.671 | 554.670 |
| pr K <sub>pr,me1:1</sub> SAPATGGVK <sub>me3:0</sub> K <sub>pr</sub> PHR; +3 <sup>b</sup>    | H3K27me1:1K36me3:0 |         |         |
| pr K <sub>pr,me1:0</sub> SAPATGGVK <sub>me3:1</sub> K <sub>pr</sub> PHR; +3 <sup>b</sup>    | H3K27me1:0K36me3:1 | 554.671 | 554.670 |
| pr K <sub>me3:2</sub> SAPATGGVK <sub>pr,me1:0</sub> K <sub>pr</sub> PHR; +3 <sup>b</sup>    | H3K27me3:2K36me1:0 |         |         |
| pr K <sub>me3:1</sub> SAPATGGVK <sub>pr,me1:1</sub> K <sub>pr</sub> PHR; +3 <sup>b</sup>    | H3K27me3:1K36me1:1 | 556.011 | 556.011 |
| pr K <sub>pr,me1:1</sub> SAPATGGVK <sub>me3:1</sub> K <sub>pr</sub> PHR; +3 <sup>b</sup>    | H3K27me1:1K36me3:1 |         |         |
| pr K <sub>pr,me1:0</sub> SAPATGGVK <sub>me3:2</sub> K <sub>pr</sub> PHR; +3 <sup>b</sup>    | H3K27me1:0K36me3:2 | 556.011 | 556.010 |
| pr K <sub>me3:3</sub> SAPATGGVK <sub>pr,me1:0</sub> K <sub>pr</sub> PHR; +3 <sup>b</sup>    | H3K27me3:3K36me1:0 |         |         |
| pr K <sub>me3:2</sub> SAPATGGVK <sub>pr,me1:1</sub> K <sub>pr</sub> PHR; +3 <sup>b</sup>    | H3K27me3:2K36me1:1 | 557.351 | 557.353 |
| pr K <sub>pr,me1:1</sub> SAPATGGVK <sub>me3:2</sub> K <sub>pr</sub> PHR; +3 <sup>b</sup>    | H3K27me1:1K36me3:2 |         |         |
| pr K <sub>pr,me1:0</sub> SAPATGGVK <sub>me3:3</sub> K <sub>pr</sub> PHR; +3 <sup>b</sup>    | H3K27me1:0K36me3:3 | 557.351 | 557.351 |
| pr K <sub>me3:3</sub> SAPATGGVK <sub>pr,me1:1</sub> K <sub>pr</sub> PHR; +3                 | H3K27me3:3K36me1:1 | 558.691 | 558.677 |
| pr K <sub>pr,me1:1</sub> SAPATGGVK <sub>me3:3</sub> K <sub>pr</sub> PHR; +3                 | H3K27me1:1K36me3:3 | 558.691 | 558.692 |
| pr K <sub>me2:0</sub> SAPATGGVK <sub>me2:0</sub> K <sub>pr</sub> PHR; +3                    | H3K27me2:0K36me2:0 | 534.654 | 534.654 |
| pr K <sub>me2:1</sub> SAPATGGVK <sub>me2:0</sub> K <sub>pr</sub> PHR; +3 <sup>b</sup>       | H3K27me2:1K36me2:0 |         |         |
| pr K <sub>me2:0</sub> SAPATGGVK <sub>me2:1</sub> K <sub>pr</sub> PHR; +3 <sup>b</sup>       | H3K27me2:0K36me2:1 | 535.995 | 535.994 |
| pr K <sub>me2:2</sub> SAPATGGVK <sub>me2:0</sub> K <sub>pr</sub> PHR; +3 <sup>b</sup>       | H3K27me2:2K36me2:0 |         |         |
| pr K <sub>me2:1</sub> SAPATGGVK <sub>me2:1</sub> K <sub>pr</sub> PHR; +3 <sup>b</sup>       | H3K27me2:1K36me2:1 |         |         |
| pr K <sub>me2:0</sub> SAPATGGVK <sub>me2:2</sub> K <sub>pr</sub> PHR; +3 <sup>b</sup>       | H3K27me2:0K36me2:2 | 537.335 | 537.335 |
| pr K <sub>me2:1</sub> SAPATGGVK <sub>me2:2</sub> K <sub>pr</sub> PHR; +3 <sup>b</sup>       | H3K27me2:1K36me2:2 |         |         |
| pr K <sub>me2:2</sub> SAPATGGVK <sub>me2:1</sub> K <sub>pr</sub> PHR; +3 <sup>b</sup>       | H3K27me2:2K36me2:1 | 538.675 | 538.676 |
| pr K <sub>me2:2</sub> SAPATGGVK <sub>me2:2</sub> K <sub>pr</sub> PHR; +3                    | H3K27me2:2K36me2:2 | 540.016 | 540.016 |
| pr K <sub>me3:0</sub> SAPATGGVK <sub>me2:0</sub> K <sub>pr</sub> PHR; +3                    | H3K27me3:0K36me2:0 | 539.327 | 539.326 |
| pr K <sub>me3:1</sub> SAPATGGVK <sub>me2:0</sub> K <sub>pr</sub> PHR; +3 <sup>b</sup>       | H3K27me3:1K36me2:0 |         |         |
| pr K <sub>me3:0</sub> SAPATGGVK <sub>me2:1</sub> K <sub>pr</sub> PHR; +3 <sup>b</sup>       | H3K27me3:0K36me2:1 | 540.667 | 540.667 |
| pr K <sub>me3:2</sub> SAPATGGVK <sub>me2:0</sub> K <sub>pr</sub> PHR; +3 <sup>b</sup>       | H3K27me3:2K36me2:0 |         |         |
| pr K <sub>me3:1</sub> SAPATGGVK <sub>me2:1</sub> K <sub>pr</sub> PHR; +3 <sup>b</sup>       | H3K27me3:1K36me2:1 |         |         |
| pr K <sub>me3:0</sub> SAPATGGVK <sub>me2:2</sub> K <sub>pr</sub> PHR; +3 <sup>b</sup>       | H3K27me3:0K36me2:2 | 542.007 | 542.007 |
| pr K <sub>me3:3</sub> SAPATGGVK <sub>me2:0</sub> K <sub>pr</sub> PHR; +3 <sup>b</sup>       | H3K27me3:3K36me2:0 |         |         |
| pr K <sub>me3:2</sub> SAPATGGVK <sub>me2:1</sub> K <sub>pr</sub> PHR; +3 <sup>b</sup>       | H3K27me3:2K36me2:1 |         |         |
| pr K <sub>me3:1</sub> SAPATGGVK <sub>me2:2</sub> K <sub>pr</sub> PHR; +3 <sup>b</sup>       | H3K27me3:1K36me2:2 | 543.347 | 543.343 |
| pr K <sub>me3:3</sub> SAPATGGVK <sub>me2:1</sub> K <sub>pr</sub> PHR; +3 <sup>b</sup>       | H3K27me3:3K36me2:1 |         |         |
| pr K <sub>me3:2</sub> SAPATGGVK <sub>me2:2</sub> K <sub>pr</sub> PHR; +3 <sup>b</sup>       | H3K27me3:2K36me2:2 | 544.688 | 544.688 |

|                                                       |                    |         |         |
|-------------------------------------------------------|--------------------|---------|---------|
| $prK_{me3:3}SAPATGGVK_{me2:2}K_{pr}PHR; +3$           | H3K27me3:3K36me2:2 | 546.028 | 546.029 |
| <i>73-83 fragment</i>                                 |                    |         |         |
| $prEIAQDFK_{pr}TDLR; +2$                              | H3K79me0:0         | 724.376 | 724.379 |
| $prEIAQDFK_{pr,me1:0}TDLR; +2$                        | H3K79me1:0         | 731.383 | 731.387 |
| $prEIAQDFK_{pr,me1:1}TDLR; +2$                        | H3K79me1:1         | 733.394 | 733.398 |
| $prEIAQDFK_{pr,me2:0}TDLR; +2$                        | H3K79me2:0         | 710.378 | 710.380 |
| $prEIAQDFK_{pr,me2:1}TDLR; +2$                        | H3K79me2:1         | 712.388 | 712.391 |
| $prEIAQDFK_{pr,me2:2}TDLR; +2$                        | H3K79me2:2         | 714.399 | 714.402 |
| <i>117-128 fragment</i>                               |                    |         |         |
| $prVTIM_0PK_{pr}DIQLAR$                               | H3M120met1:0       | 748.929 | 748.933 |
| $prVTIM_{0,ox}PK_{pr}DIQLAR$                          | H3M120met1:0ox     | 756.927 | 756.932 |
| $prVTIM_1PK_{pr}DIQLAR$                               | H3M120met1:1       | 750.940 | 750.944 |
| $prVTIM_{1,ox}PK_{pr}DIQLAR$                          | H3M120met1:1ox     | 758.937 | 758.942 |
| <b>Histone H4</b>                                     |                    |         |         |
| <i>1-17 fragment(4-17 for unmodified)</i>             |                    |         |         |
| $prGK_{pr}GGK_{pr}GLGK_{pr}GGAK_{pr}R; +2$            | H4R3me0:0          | 775.955 | 775.956 |
| $prGK_{pr}GGK_{pr}GLGK_{pr}GGAK_{pr}R; +3$            | “ “                | 517.639 | 517.640 |
| $acSGR_{me1:0}GK_{pr}GGK_{pr}GLGK_{pr}GGAK_{pr}R; +2$ | H4R3me1:0          | 926.032 | 926.032 |
| $acSGR_{me1:0}GK_{pr}GGK_{pr}GLGK_{pr}GGAK_{pr}R; +3$ | H4R3me1:0          | 617.690 | 617.692 |
| $acSGR_{me1:1}GK_{pr}GGK_{pr}GLGK_{pr}GGAK_{pr}R; +2$ | H4R3me1:1          | 928.042 | 928.042 |
| $acSGR_{me1:1}GK_{pr}GGK_{pr}GLGK_{pr}GGAK_{pr}R; +3$ | H4R3me1:1          | 619.030 | 619.032 |
| <i>20-23 fragment</i>                                 |                    |         |         |
| $prK_{pr}VLR; +1$                                     | H4K20me0:0         | 627.419 | 627.419 |
| $prK_{pr}VLR; +2$                                     | “ “                | 314.214 | 314.213 |
| $prK_{pr,me1:0}VLR; +1$                               | H4K20me1:0         | 641.435 | 641.435 |
| $prK_{pr,me1:0}VLR; +2$                               | “ “                | 321.222 | 321.221 |
| $prK_{pr,me1:1}VLR; +1$                               | H4K20me1:1         | 645.456 | 645.458 |
| $prK_{pr,me1:1}VLR; +2$                               | “ “                | 323.232 | 323.232 |
| $prK_{me2:0}VLR; +2$                                  | H4K20me2:0         | 300.216 | 300.215 |
| $prK_{me2:1}VLR; +2$                                  | H4K20me2:1         | 302.226 | 300.226 |
| $prK_{me2:2}VLR; +2$                                  | H4K20me2:2         | 304.237 | 304.237 |
| $prK_{me3:0}VLR; +2$                                  | H4K20me3:0         | 307.224 | 307.224 |
| $prK_{me3:1}VLR; +2$                                  | H4K20me3:1         | 309.234 | 309.235 |
| $prK_{me3:2}VLR; +2$                                  | H4K20me3:2         | 311.244 | 311.246 |
| $prK_{me3:3}VLR; +2$                                  | H4K20me3:3         | 313.255 | 313.257 |
| <i>79-92 fragment</i>                                 |                    |         |         |
| $prK_{pr}TVTAM_0DVVYALK_{pr}R$                        | H4M84met1:0        | 882.496 | 882.501 |
| $prK_{pr}TVTAM_{0,ox}DVVYALK_{pr}R$                   | H4M84met1:0ox      | 890.494 | 890.498 |
| $prK_{pr}TVTAM_1DVVYALK_{pr}R$                        | H4M84met1:1        | 884.506 | 884.511 |
| $prK_{pr}TVTAM_{1,ox}DVVYALK_{pr}R$                   | H4M84met1:1ox      | 892.504 | 892.510 |

<sup>a</sup> PTMs identified include propionylation (pr, +56 Da), acetylation (ac) and methylation (meX:Y), where X = number of total methyl groups and Y = number of labeled methyl groups. Methionine oxidation (ox) was also accounted for certain peptides. Peptides used for determining overall histone turnover (H1.4 33-53, H3 117-128, and H4 79-92 fragment) have similar simplified notation, but the specific residue is labeled (“lys” and “met” for lysine and methionine respectively).

<sup>b</sup> Unable to differentiate between peptides using MS/MS data.

**SUPPLEMENTAL TABLE 2.** The average half-max time ( $t_{1/2}$ , days) of fully labeled histone methylation sites, depending on the methylation or acetylation state of another residue on the same peptide. H3K27me3:3K36me2:2 was detected in only one run, and consequently, standard error was not determined.

| <b>PTM</b>         | <b><math>t_{1/2}</math></b> | <b>Std. Error</b> |
|--------------------|-----------------------------|-------------------|
| H3K9me1:1K14ac0    | 0.470                       | 0.012             |
| H3K9me1:1K14ac1    | 0.719                       | 0.162             |
| H3K9me2:2K14ac0    | 1.688                       | 0.360             |
| H3K9me2:2K14ac1    | 1.446                       | 0.790             |
| H3K27me1:1K36me0:0 | 0.909                       | 0.320             |
| H3K27me1:1K36me1:1 | 0.840                       | 0.226             |
| H3K27me1:1K36me2:2 | 1.584                       | 0.444             |
| H3K27me1:1K36me3:3 | 3.680                       | 1.103             |
| H3K27me2:2K36me0:0 | 1.515                       | 0.011             |
| H3K27me2:2K36me1:1 | 1.963                       | 0.244             |
| H3K27me2:2K36me2:2 | 4.337                       | 1.017             |
| H3K27me3:3K36me0:0 | 4.618                       | 0.144             |
| H3K27me3:3K36me1:1 | 3.849                       | 1.499             |
| H3K27me3:3K36me2:2 | 8.931                       | 2.040             |
| H3K27me0:0K36me1:1 | 0.714                       | 0.696             |
| H3K27me1:1K36me1:1 | 1.726                       | 0.132             |
| H3K27me2:2K36me1:1 | 2.223                       | 0.586             |
| H3K27me3:3K36me1:1 | 2.963                       | 1.332             |
| H3K27me0:0K36me2:2 | 0.881                       | 0.100             |
| H3K27me1:1K36me2:2 | 1.940                       | 0.081             |
| H3K27me2:2K36me2:2 | 2.847                       | 0.346             |
| H3K27me3:3K36me2:2 | 3.273                       | -                 |
